# Pervasive Transcription Fine-tunes Replication Origin Activity

Tito Candelli<sup>1,2,°</sup>, Julien Gros<sup>1,°,\*</sup> and Domenico Libri<sup>1,\*</sup>

<sup>1</sup> Institut Jacques Monod, CNRS UMR 7592, Université Paris Diderot, Sorbonne Paris Cité,  
75205 Paris Cedex 13, France

<sup>2</sup> (present address:) Princess Máxima Center for Pediatric Oncology, Uppsalalaan 8, 3584 CT  
Utrecht, The Netherlands

<sup>°</sup> Co-first authors

\* Correspondance to: [domenico.libri@ijm.fr](mailto:domenico.libri@ijm.fr) and [julien.gros@ijm.fr](mailto:julien.gros@ijm.fr)

Number of characters (spaces, Abstract and Figure Legends excluded): ≈ 50 000

Running title: Pervasive transcription and replication initiation in *S. cerevisiae*

15

## ABSTRACT

16

(149 words)

17

18 RNA polymerase (RNAPII) transcription occurs pervasively, which raises the important  
19 question of its functional impact on other DNA-associated processes, including replication. In budding  
20 yeast, replication originates from Autonomously Replicating Sequences (ARSs), generally located in  
21 intergenic regions. The influence of transcription on ARSs function has been studied for decades, but  
22 these earlier studies have necessarily neglected the role of non-annotated transcription. We studied  
23 the relationships between pervasive transcription and replication origin activity using high-resolution  
24 transcription maps. We show that ARSs alter the pervasive transcription landscape by pausing and  
25 terminating neighboring RNAPII transcription, thus limiting the occurrence of pervasive transcription  
26 within origins. We provide evidence that quasi-symmetrical binding of the ORC complex to ARS  
27 borders is responsible for pausing/termination. We also show that low, physiological levels of  
28 pervasive transcription impact the function of replication origins. Overall, our results have important  
29 implications for understanding the impact of genomic location on origin function.

## INTRODUCTION

30  
31  
32  
33  
34  
35  
36  
37  
38  
39  
40  
41  
42  
43  
44  
45  
46  
47  
48  
49  
50  
51  
52  
53  
54  
55  
56  
57  
58  
59  
60  
61  
62  
63  
64  
65  
66  
67  
68  
69

The annotation of transcription units has traditionally heavily relied on the detection of RNA molecules. However, in the last decade, many genome-wide studies based on the direct detection of RNA polymerase II (RNAPII) have clearly established that transcription extends largely beyond the limits of regions annotated for coding functional RNA or protein products (Jacquier, 2009; Porrua & Libri, 2015). The generalized presence of transcribing RNA polymerases, not necessarily associated to the production of stable RNAs, defines pervasive or hidden transcription, which is a conserved feature of both eukaryotic and prokaryotic transcriptomes.

In *S. cerevisiae*, pervasive transcription accounts for the production of a multitude of transcripts generally non-coding, many of which undergo degradation in the nucleus or the cytoplasm (Jacquier, 2009; Porrua & Libri, 2015). Transcription termination limits the extension of many non-coding transcription events, compensating, to some extent, the promiscuity of initiation (for recent reviews see: Jensen et al, 2013; Porrua & Libri, 2015). In *S. cerevisiae* cells, two main pathways are known for terminating normal and pervasive RNAPII transcription events (Porrua et al, 2016). The first is employed for termination of mRNA coding genes and depends on the CPF-CF (Cleavage and Polyadenylation Factor-Cleavage Factor) complex. Besides participating in the production of mRNAs, this pathway is also important for transcription termination of several classes of non-coding RNAs, namely SUTs (Stable Unannotated Transcripts) and XUTs (Xrn1-dependent Unstable Transcripts) (Marquardt et al, 2011). Transcription terminated by this pathway produces RNAs that are exported to the cytoplasm and enter translation. If they contain premature stop codons they are subject to the nonsense mediated decay and might not be detected in wild-type cells (van Dijk et al, 2011; Malabat et al, 2015).

The second pathway depends on the NNS (Nrd1-Nab3-Sen1) complex and is responsible for terminating transcription of genes that do not code for proteins. Small nucleolar RNAs (snoRNAs) and Cryptic Unstable Transcripts (CUTs), a prominent class of RNAPII pervasive transcripts, are typical targets of NNS-dependent termination. One important feature of this pathway is its association with proteins involved in nuclear RNA degradation such as the exosome and its cofactor, the Trf4-Mtr4-Air (TRAMP) complex. The released RNA is not exported to the cytoplasm but polyadenylated by TRAMP and nucleolytically attacked by the exosome that trims snoRNAs to their mature length and fully degrades CUTs.

Recent studies in yeast and other eukaryotes have shown that constitutive and regulated readthrough at terminators provides a very significant contribution to pervasive transcription (Vilborg et al, 2015; Grosso et al, 2015; Rutkowski et al, 2015; Candelli et al, 2018). Fail-safe mechanisms are in place to back up termination and restrict transcription leakage at terminators. One of these mechanisms terminates "stray" transcription by harnessing the capability of DNA-bound proteins to roadblock RNAPII. Roadblocked polymerases are then released from the DNA via their ubiquitination and likely degradation (Colin et al, 2014).

The ubiquitous average coverage of the genome by transcription, coupled to the remarkable stability of the transcription elongation complex, raises the important question of the efficient

70 coordination of machineries that must read, replicate, repair and maintain the same genomic  
71 sequences. The crosstalks between transcription and replication are paradigmatic in this respect.

72

73 Eukaryotic cells faithfully duplicate each of their chromosomes by initiating their replication  
74 from many origin sites (Bell & Labib, 2016). To ensure once-and-only-once DNA replication per cell  
75 cycle, coordination of initiation from these different sites is guaranteed by a two-step mechanism:  
76 replication origins have to be licensed before getting activated (Diffley, 2004). Licensing occurs from  
77 late mitosis to the end of G1 and consists in the deposition of pre-RCs (pre-Replication Complexes)  
78 around origin sites. To do so, ORC (Origin Recognition Complex) recognizes and binds specifically  
79 origin DNA where it recruits Cdc6 and Cdt1 to coordinate the deposition of the replicative helicase  
80 engine, the hexameric Mcm2-7 complex. At each licensed origin is deposited a pair of Mcm2-7  
81 hexamers assembled head-to-head as a still inactive double-hexamer (DH) encircling DNA. At the  
82 G1/S transition and throughout S-phase, the orderly recruitment of firing factors onto the Mcm2-7 DH  
83 activates it, ultimately triggering the building of two replisomes synthesizing DNA from the origin  
84 (Parker *et al*, 2017).

85 *S. cerevisiae* origins are specified in *cis* by the presence of Autonomously Replicating  
86 Sequences (ARSs). Within each ARS, ORC recognizes and binds specifically the ACS (ARS  
87 Consensus Sequence, 5'-WTTTATRTTTW-3'; Palzkill & Newlon, 1988; Diffley & Cocker, 1992; Bell &  
88 Stillman, 1992). The ACS oriented by its T-rich strand is generally found at the 5' ends of ARS  
89 sequences (Eaton *et al*, 2010). A-rich stretches are often present at the opposite end of ARSs and  
90 have been proposed to function as additional ACSs oriented opposite to the main ACS (Breier *et al*,  
91 2004; Yardimci & Walter, 2014). Such secondary ACSs have been shown to strengthen pre-RC  
92 assembly at ARS *in vitro* and proposed to ensure ARS function *in vivo* by driving the cooperative  
93 recruitment of a second ORC (Coster & Diffley, 2017). This is somewhat challenged by the *in vitro*  
94 reconstitution of pre-RC assembly on single DNA molecules, supporting the recruitment of only one  
95 ORC per DNA (Ticau *et al*, 2015; Duzdevich *et al*, 2015). Whether one or two ORC molecules are  
96 recruited at ARSs *in vivo* for efficient pre-RC assembly is therefore a matter of debate, and  
97 independent lines of evidence are currently missing.

98 ACS presence is necessary but not sufficient for ARS function *in vivo*, as only a small fraction  
99 of all ACSs found in the *S. cerevisiae* genome corresponds to active ARSs (Tuduri *et al*, 2010). Other  
100 factors, including the structure of chromatin, participate to origin specification and usage. On the one  
101 hand, ORC binding at the ACS shapes NFR formation, nucleosome positioning and nucleosome  
102 occupancy, which all together maximize pre-RC formation (Lipford & Bell, 2001; Eaton *et al*, 2010;  
103 Belsky *et al*, 2015; Rodriguez *et al*, 2017). On the other hand, specific histone modifications mark  
104 replication initiation sites (Unnikrishnan *et al*, 2010) and chromatin-coupled activities ensure replication  
105 forks progression and origin efficiency (Kurat *et al*, 2017; Devbhandari *et al*, 2017; Azmi *et al*, 2017).  
106 The transcription machinery could participate to the establishment of a specific chromatin landscape  
107 and/or play a more direct role in the specification and function of origins. However, to what extent  
108 annotated and non-annotated transcription at and around origins can influence replication remains  
109 unclear.

110

111           Studies have proposed that transcription might activate replication origins (Knott *et al*, 2012;  
112 Fang *et al*, 2017). The binding of general transcription factors such as Abf1 and Rap1, or even the  
113 tethering of transcription activation domains, TBP or Mediator components was shown to be required  
114 for efficient firing of a model ARS (Marahrens & Stillman, 1992; Stagljar *et al*, 1999). These findings  
115 are in apparent contrast with the demonstration that strong transcription through ARSs is detrimental  
116 for their function (Snyder *et al*, 1988; Tanaka *et al*, 1994; Chen *et al*, 1996; Mori & Shirahige, 2007;  
117 Lööke *et al*, 2010), or with the natural inactivation of intragenic origins by meiotic-specific transcription  
118 (Mori & Shirahige, 2007; Blitzblau *et al*, 2012). Origin inactivation has been correlated to the  
119 impairment of ORC binding and pre-RC assembly, possibly because of steric conflicts with  
120 transcribing RNAPII (Mori & Shirahige, 2007; Lööke *et al*, 2010). Strong transcription through origins  
121 was found to terminate, at least to some extent, within ARS sequences at cryptic termination sites,  
122 generating stable and polyadenylated transcripts (Chen *et al*, 1996; Magrath *et al*, 1998). However, it  
123 was concluded that transcription termination within ARSs and origin function are not functionally  
124 linked, as mutationally impairing either one would not affect the other. In particular it was found that  
125 transcription termination was not due to ORC roadblocking RNAPII and, conversely, that origin activity  
126 was not dependent on termination taking place within the ARS (Chen *et al*, 1996; Magrath *et al*, 1998).

127           Even if unrestricted transcription inactivates intragenic origins (Mori & Shirahige, 2007;  
128 Blitzblau *et al*, 2012), these cases hardly represent the chromosomal context of most mitotically active  
129 origins, which are intergenic (Donato *et al*, 2006; MacAlpine & Bell, 2005; Nieduszynski *et al*, 2005)  
130 and are generally not exposed to the levels of transcription found within genes. Most importantly,  
131 these earlier studies could not take into account the potential impact of annotated and non-annotated  
132 levels of pervasive transcription, which is not easily detected, due to the general instability of the RNA  
133 produced and to the poor resolution of many techniques for detecting RNAPII occupancy. Such  
134 generally low levels of transcription have been recently found to significantly impact the expression of  
135 canonical genes and to be limited by fail safe and redundant transcription termination pathways  
136 (Candelli *et al*, 2018; Roy *et al*, 2016).

137

138           We investigated here the impact of physiological levels of pervasive transcription on the  
139 function of replication origins in *S. cerevisiae*. Using nucleotide-resolution transcription maps, we  
140 studied the transcriptional landscape around and within origins, regardless of annotations. Origins  
141 generate a characteristic footprint in the ubiquitous transcriptional landscape, due to the pausing of  
142 RNAPII at the origin borders. We provide *in vivo* evidence for a quasi-symmetrical origin topology  
143 determined by the binding of a second ORC complex to a secondary ACS site opposite to the primary  
144 site, consistent with previous *in vitro* data (Coster & Diffley, 2017). Transcription terminates at the  
145 border of the primary ACS, in an ORC and pre-RC dependent manner, by a mechanism that has  
146 roadblock features. The transcriptional footprint at origins is not symmetrical and we provide evidence  
147 that RNAPII pauses upstream of the secondary ACS but mainly terminates within the ARS. The low  
148 levels of pervasive transcription that enter ARSs negatively affect the efficiency of licensing and firing,

149 with pervasive transcription incoming from the secondary ACS affecting origin function to a higher  
150 extent.

151           These results have important implications for understanding the impact of genomic location on  
152 origin specification, efficiency and timing of activation. Because pervasive transcription is conserved  
153 and generally increases with increased genome complexity, they are also susceptible to be relevant  
154 for the mechanism of replication initiation in other eukaryotes, particularly in metazoans.

## RESULTS

### ***RNAPII pausing and transcription termination occur at ARS borders***

Although considerable efforts have been made to annotate transcription units independently from the production of stable RNAs, many transcribed regions still remain imprecisely or poorly annotated in the *S. cerevisiae* genome. Addressing the potential impact of transcription on the function of replication origins therefore requires taking into account the actual physiological levels of transcription, regardless of annotation. For these reasons, we relied on high-resolution transcription maps derived from the direct detection of RNAPII by the sequencing of the nascent transcript (RNAPII PAR-CLIP, Photo-Activable Ribonucleoside-enhanced UV-Crosslink and Immunoprecipitation) (Schaughency et al, 2014). We also generated additional datasets using the analogous RNAPII CRAC, (Crosslinking Analysis of cDNAs, Granneman et al, 2009; Candelli et al, 2018). Both methods detect significant levels of transcription in many regions that lack annotations (data not shown; Candelli et al, 2018).

We retrieved a total of 228 origins that we oriented according to the direction of the T-rich strand of their proposed ACS (Nieduszynski et al, 2006). Origins were then anchored at the 5' ends of their ACS and the median distribution of RNAPII occupancy was plotted in a 1kb window around the anchoring site (**Figure 1A**). Strikingly, RNAPII signal accumulates over the 200nt preceding the T-rich strand of the ACS and sharply decreases within the 25nt immediately preceding it (**Figure 1A**, blue trace). The RNAPII signal build-up suggests that pausing occurs before the ACS, while its abrupt reduction might indicate that transcription termination occurs immediately upstream of the site. This behavior is reminiscent of roadblock termination whereby transcription elongation is impeded by factors or complexes binding the DNA, and RNA polymerase is released following its ubiquitylation (Colin et al, 2014; Roy et al, 2016; Candelli et al, 2018). RNAPII signal also builds up from antisense transcription although in a more articulated manner (**Figure 1A**, red trace) and starts declining on average 120nt upstream of the 5' border of the ACS.

Although the sharp decrease of RNAPII signal immediately preceding the ACS is suggestive of transcription termination, it is possible that RNAPII occupancy downstream of the ACS decreases because of a shorter persistency of the elongation complex in these regions, for instance because of higher transcription speed. We thus sought independent evidence of transcription termination before the ACS. Transcription termination is accompanied by release of the transcript and generally by its polyadenylation. Therefore, we mapped the distribution of polyadenylated RNA 3'-ends around origins as a proxy for transcription termination (**Figure 1B**, blue). Because roadblock termination produces RNAs that are mainly degraded in the nucleus, we also profiled the distribution of RNA 3'-ends in cells depleted for the two catalytic subunits of the exosome, Rrp6 and Dis3 (Roy et al, 2016) (**Figure 1B**, transparent red). At each position around the ACS, we scored the number of genomic sites containing at least one RNA 3'-end without taking into consideration the read count at each site. This conservative strategy determines whether termination occurs at each position, and prevents high read



195 count values from dominating the aggregate value. The distribution of RNA 3'-ends – and therefore of  
196 transcription termination events – closely mirrors the distribution of RNAPII on the T-rich strand of the  
197 ACS and peaks immediately upstream of the ACS. Note that because the whole read is taken into  
198 account to map RNAPII distribution, while only the terminal nucleotide is used to map the 3'-ends, the  
199 distribution of RNA 3'-ends is shifted downstream relative to the distribution of RNAPII. Importantly,  
200 and consistent with a roadblock mechanism, the 3'-end count upstream of the ACS is higher in the  
201 absence of the exosome (**Figure 1B**, transparent red), strongly suggesting that these termination  
202 events produce, at least to some extent, RNAs that are degraded in the nucleus.

203 These observations strongly suggest that the landscape of pervasive transcription is  
204 significantly altered by the presence of replication origins. Incoming RNAPIIs are paused with an  
205 asymmetric pattern around ARSs and termination occurs upstream of the mapped ACS.

206

207 To assess the origin of the asymmetry in RNAPII distribution, we considered the possibility  
208 that RNAPIIs transcribing in the antisense direction relative to the ACS might be paused at the level of  
209 putative secondary ACSs located downstream within the ARS. Such secondary ACSs, proposed to be  
210 positioned 70-400nt downstream and in the opposite orientation of the main ACS, have been shown to  
211 be required *in vitro* for efficient pre-RC assembly and suggested to play an important role for origin  
212 function *in vivo* (Coster & Diffley, 2017). The variable position of these secondary ACS sequences  
213 could explain why the antisense RNAPII meta-signal spreads over a larger region when ARSs are  
214 aligned to the 5' ends of their primary ACSs (**Figure 1C**). We therefore mapped such putative  
215 secondary ACSs using a consensus matrix derived from the set of known primary ACSs (Coster &  
216 Diffley, 2017) (**Table 2**). As shown on **Supplementary Figure 1A**, distances between the primary and  
217 the predicted secondary ACS distribute widely and preferentially cluster around  $\approx 100$ nt (median  
218 113.5), consistent with functional data obtained using artificial constructs (Coster & Diffley, 2017). As  
219 possibly expected, the calculated similarity scores for these predicted ACSs are generally lower than  
220 the ones calculated for the main ACSs (see the distribution in **Supplementary Figure 1B**). When we  
221 aligned origins to the first position of their predicted secondary ACSs (**Figure 1C** and **Figure 1D**, black  
222 trace) we observed a significant sharpening of the RNAPII occupancy peak compared to the alignment  
223 on their primary ACSs (**Figure 1D**, compare red to black traces). This suggests that RNAPII is indeed  
224 pausing immediately upstream of the secondary ACS. Interestingly, when we aligned polyadenylated  
225 RNA 3'-ends using the first position of the predicted secondary ACSs, we observed that transcription  
226 termination distributed preferentially  $\approx 50$ nt after the anchor (**Figure 1E**, blue trace, compare to RNAPII  
227 distribution, black trace) indicating that in most instances antisense transcription terminates  
228 downstream of the site of RNAPII pausing.

229

230 To better highlight the presence and the role of a roadblock (RB) at these origins, we  
231 examined local transcription by RNAPII CRAC under conditions in which an essential component of  
232 either the CPF-CF or the NNS termination pathways is affected, i.e. in an *rna15-2* mutant at the non-  
233 permissive temperature, or by depleting Nrd1 by the auxin-degron method (Candelli *et al*, 2018). We  
234 reasoned that defects in CPF-CF or the NNS pathways would affect the levels of neighboring



235 readthrough transcription directed towards these origins and consequently increase the transcriptional  
236 loads challenging the roadblocks. Representative examples are shown in **Figure 2**.

237 In the case of *ARS305* (**Figure 2A**), low levels of readthrough transcription are found at the  
238 terminators of the adjacent transcription units (*YCL049C* or *CUT040*) and are subjected to roadblock  
239 termination at both the main (blue) or the putative secondary ACSs (red, overlaps with the previously  
240 mapped B4 element (Huang & Kowalski, 1996)), respectively. Increase in readthrough transcription at  
241 the *YCL049C* gene in *rna15-2* cells (sense transcription, light green track) or at *CUT040* upon *Nrd1*  
242 depletion (antisense transcription, light pink track), leads to increased accumulation of RNAPII at both  
243 ACSs and to transcription invading the ARS.

244 Two ACSs were previously mapped for *ARS413* (**Figure 2B**): sense ACS1 (Eaton *et al*, 2010)  
245 and antisense ACS2 (Nieduszynski *et al*, 2006). Transcription on the plus strand is strongly  
246 roadblocked at ACS1, while transcription on the minus strand is roadblocked at both ACS2 and ACS1.  
247 In both cases, transcription derives only from the upstream genes (*YDL073W* and *YDL072C*,  
248 respectively) because no additional initiation sites could be detected, even in cytoplasmic and nuclear  
249 RNA degradation mutants (data not shown). When the transcription load was increased by affecting  
250 the termination of *YDL073W* and *YDL072C* in *rna15-2* cells at the non-permissive temperature (light  
251 green tracks), RNAPII occupancy at the RBs increases and some readthrough within the ARS occurs.  
252 This example strongly suggests that both mapped ACSs are occupied by the ORC complex, although  
253 it is not clear whether they function in conjunction or alternatively in different cells.

254 Two additional examples are shown in **Figure 2**. In the case of *ARS431* (**Figure 2C**), the RB  
255 is more prominent on the site of the primary ACS and increases when the transcriptional load is higher  
256 due to readthrough from the upstream gene, *YDR297W*, in *rna15-2* cells. On the contrary, a prominent  
257 site of RB at the secondary ACS is observed at *ARS453* (or *ARS432.5*; **Figure 2D**), while the RB at  
258 primary ACS cannot be observed because transcription of *CUT523* appears to terminate efficiently  
259 upstream.

260  
261 Taken together, these results suggest that primary and secondary ACSs, both presumably  
262 bound by ORC, can induce RNAPII pausing at the borders of replication origins. However, while  
263 RNAPII generally pauses and terminates upstream of primary ACS sequences, RNAPII often pauses  
264 at secondary ACS but terminates downstream. Importantly, such ARS footprint in the pervasive  
265 transcription landscape (**Figure 2**) provides independent *in vivo* evidence of the existence of  
266 secondary ACS sequences (Coster & Diffley, 2017), while metaanalyses (**Figure 1**) strongly suggest a  
267 general functional difference between primary and secondary ACSs with regards to incoming  
268 transcription.

269  
270 ***Termination of transcription at ARSs is mediated by ORC binding to the DNA***

271  
272 Transcription termination around origins might depend on many termination factors. The main  
273 transcription termination pathways in *S. cerevisiae*, NNS- and CPF-dependent, rely on the recognition  
274 of termination signals on the nascent RNA. Release of the polymerase occurs therefore after the

275 termination signals that have been transcribed and recognized. Transcription termination by  
276 roadblock, on the other hand, ensues from a collision of the transcription elongation complex with a  
277 DNA bound protein, and therefore occurs upstream of the termination signal. Another characteristic  
278 feature of roadblock termination is that the released RNA is subject to exosome-dependent  
279 degradation. Both features, termination upstream of the termination signal and nuclear degradation of  
280 the released transcripts, are compatible with the notion that roadblock termination occurs at origins.  
281 Still, it remains possible that termination at the immediate borders of origins depends on conserved  
282 external signals allowing the recruitment of CPF- or NNS- components. According to the position of  
283 RNAPII pausing, the most likely roadblocking factor would be the ORC complex bound to the ACS.

284 We therefore first verified that termination depends on the ACS sequence and to this end we  
285 cloned a 500bp DNA fragment containing *ARS305* in a reporter system allowing the detection of  
286 transcription termination (Porrua et al, 2012) (**Figure 3**). This fragment conferred ACS-dependent  
287 mitotic maintenance to a centromeric version of the reporter construct, indicating that it is a functional  
288 ARS (**Supplementary Figure 2**). In this system, a test terminator sequence is cloned between two  
289 promoters, the downstream of which allows the expression of a reporter gene, *CUP1*, which is  
290 required for yeast growth in the presence of copper ions (**Figure 3A**). Transcription from the upstream  
291 promoter interferes with and thus inactivates the promoter driving expression of *CUP1* unless the test  
292 sequence contains a terminator. Copper resistant is therefore a reliable, positive read out of the  
293 presence of a transcription terminator in the cloned sequence. Consistent with the notion that  
294 termination occurs at replication origins, insertion of *ARS305* in the orientation dictated by the T-rich  
295 strand of the ACS conferred robust copper-resistant growth to yeast cells (**Figure 3B**). Importantly,  
296 copper resistance was abolished when the ACS was mutated, strongly suggesting that termination is  
297 strictly dependent on the integrity of the ORC binding site.

298 This notion was further supported by Northern blot analysis of the transcripts produced when a  
299 shorter *ARS305* fragment containing the ACS and the downstream 154nt were introduced in the same  
300 reporter construct (**Figure 3C**). A short transcript witnessing the occurrence of termination was readily  
301 detected in the presence of *ARS305* (lane 3). Consistent with the notion that roadblock termination  
302 occurs at *ARS305*, the transcript released was subject to exosomal degradation and was stabilized by  
303 deletion of Rrp6 (lane 4). This short RNA disappeared when the ACS sequence was mutated, to the  
304 profit of a longer species resulting from termination downstream of *ARS305*, confirming the ACS-  
305 dependency of termination (lane 5). *ARS305* contains, in addition to the ACS, two motifs, B1 and B4,  
306 required for full origin function (Huang & Kowalski, 1996). Interestingly, B4 is located roughly 100nt  
307 downstream of the ACS, and coincides with a predicted secondary ACS required for efficient  
308 symmetrical loading of the pre-RC (**Figure 2** and **Table 2**) (Coster & Diffley, 2017). To assess whether  
309 the primary ACS is sufficient to induce transcription termination, we mutated both B1 and B4, alone or  
310 in combination, and assessed the level of termination by Northern blot. As shown in lanes 6 and 7,  
311 mutation of B4 had the strongest effect on termination, which was very similar to the effect observed  
312 when the main ACS was mutated. Mutation of B1 had a minor but significant effect. From these  
313 experiments, we conclude that the high affinity ORC binding site alone is necessary but not sufficient

314 for inducing transcription termination at *ARS305*, and that the secondary ACS (B4) and the B1 motif  
315 are additionally required.

316

317 To provide independent evidence that ORC bound to the ARS triggers transcription  
318 termination by a roadblock mechanism, we took advantage of the finding that many sequences with a  
319 perfect match to the ACS consensus do not bind ORC. We used published coordinates of ACSs  
320 bound (ORC-ACSs) or not recognized (nr-ACSs) by the ORC complex in ORC-ChIP-seq experiments  
321 (Eaton et al, 2010), and mapped transcripts 3'-ends (Roy et al, 2016) as a proxy for the occurrence of  
322 transcription termination (**Figures 4A, 4B**). As previously, we oriented each ARS according to the  
323 direction of the T-rich ORC-ACS or nr-ACS. As expected, the distribution of transcription termination  
324 events around the set of ORC-bound ACSs is very similar to the one observed around replication  
325 origins mapped by Nieduszynski et al. (Nieduszynski et al, 2006) (compare **Figure 4A** and **Figure**  
326 **1B**). As in the previous analysis, many unstable transcripts are produced by termination around origins  
327 as witnessed by the overall higher level of 3'-ends mapped in an exosome-deficient strain (**Figure 4A**).  
328 The distribution of RNA 3'-ends around the set of nr-ACSs is however radically different, with  
329 transcription events presumably crossing the nr-ACS in both directions and terminating downstream  
330 (**Figure 4B**). Interestingly, at nr-ACSs, the amounts of 3'-ends detected are very similar in wild-type  
331 conditions or upon depletion of both Rrp6 and Dis3 subunits of the nuclear exosome, indicating that  
332 termination downstream of nr-ACSs does not produce unstable transcripts and is presumably  
333 dependent on the CPF pathway (**Figure 4B**).

334 Because the ACS sequence is nearly identical in the two datasets, it is unlikely that it alone  
335 could be responsible for the termination pattern observed at ORC-ACSs. These observations are  
336 consistent with the notion that the presence of ORC bound to the ACS is necessary to roadblock  
337 transcribing RNAPII, which releases a fraction of unstable RNAs. To substantiate these findings we  
338 set up to assess directly the impact of ORC depletion on transcribing RNAPII at two model origins,  
339 *ARS404* and *ARS1004*, located downstream of the *YDL227C* and *YJL217W* genes, respectively. In  
340 both cases, RNAPII signals are present immediately upstream of the T-rich strand of the ACS,  
341 presumably because of transcription events reading through the upstream terminator that are  
342 roadblocked at the site of ORC binding (**Figure 4C**). To assess the efficiency of the roadblock we  
343 measured RNA levels immediately upstream and downstream of the T-rich strand of each ACS in a  
344 strand-specific manner by RT-quantitative PCR (**Figure 4C, 4D**). Because no transcription initiation  
345 can be detected at either one of the two ACSs (data not shown), RNA signals detected downstream of  
346 the ACS are most likely due to molecules that initiate upstream and cross the ACS. We therefore  
347 expressed the efficiency of the roadblock as the ratio between the signals downstream and upstream  
348 of the ACS. Release of the roadblock is expected to increase this ratio because more RNAPII  
349 molecule would traverse the ACS. To affect binding of ORC to the ACS we used two thermosensitive  
350 mutants of two ORC subunits, *Orc2-1* and *Orc5-1*, which affect the binding of ORC to the DNA  
351 (Santocanale & Diffley, 1996; Loo *et al*, 1995; Yuan *et al*, 2017; Shimada *et al*, 2002). As shown in  
352 **Figure 4D**, ORC roadblock at *ARS404* and *ARS1004* is efficient, allowing only between 1-10% of the  
353 incoming transcription to cross the ACS in wild-type cells or under permissive temperature for all

354 mutants (**Figure 4D**, 23°C). When the binding of ORC to the ACS was affected in *orc2-1* and *orc5-1*  
355 cells at 37°C, a marked increase in the fraction of RNAPII going through the roadblock is observed,  
356 indicating that binding of the ORC complex to the ACS is necessary to terminate upstream incoming  
357 transcription.

358 Cdc6 binds DNA cooperatively with ORC and contributes to origin specification by  
359 participating to pre-RC assembly (Speck et al, 2005; Speck & Stillman, 2007; Yuan et al, 2017 and  
360 references therein). The thermosensitive mutant Cdc6-1 (Hartwell et al, 1973) which is affected in pre-  
361 RC assembly at the restrictive temperature (Cocker et al, 1996), still does not preclude ORC to  
362 footprint at candidate ARSs (Santocanale & Diffley, 1996). Remarkably, the transcriptional roadblock  
363 was markedly reduced in a *cdc6-1* mutant at the non-permissive temperature, to a similar extent as for  
364 the *orc2-1* and *orc5-1* mutants. This indicates that the assembly of an ORC•Cdc6 complex, or the full  
365 complement of the pre-RC at the candidate ARS, is essential for efficiently roadblocking RNAPII.

366

367 From these results, we conclude that the stable binding of the ORC complex to the ACS is  
368 necessary but not sufficient to efficiently terminate incoming transcription at ARS by a roadblock  
369 mechanism.

370

### 371 ***Impact of local pervasive transcription on ARS function***

372

373 In spite of the presence of bordering roadblocks, low levels of pervasive transcription, which  
374 presumably originates in neighboring regions and cross the sites of ORC occupancy, were detected  
375 within replication origins (**Figures 1-3**). To assess the impact of local physiological levels of  
376 transcription within ARS, we sought correlations between total RNAPII occupancy on both ARS  
377 strands in a window of 100nt starting at the first base of the primary ACS, and licensing efficiency or  
378 origin activation (Hawkins et al, 2013) We ordered the origins described by Nieduszynski et al.  
379 (Nieduszynski et al, 2006) according to the levels of transcription at and immediately downstream of  
380 the T-rich ACS and compared the licensing efficiency of the 30 origins having the highest transcription  
381 levels to the rest of the population (160 origins) for which replication metrics were available (total of  
382 190 origins) (**Supplementary Table 1**). We found that the efficiency of licensing was significantly  
383 lower for the origins having the highest levels of transcription (**Figure 5A**; p=0.003). We also found  
384 that origins having the highest levels of transcription display a lower probability of firing compared to  
385 the rest of the population (**Figure 5B**; p=0.012).

386

387 The effect observed on origin firing might be a consequence of the impact of transcription on  
388 licensing. However, it is also possible that local levels of pervasive transcription impact origin  
389 activation after licensing. To address this possibility, we focused on the 30 origins that have the  
390 highest levels of incoming transcription as defined by the levels of RNAPII occupancy preceding  
391 (**Figure 6A**; "A") and following (**Figure 6A**; "C") a 200nt window aligned at the 5' end of the ACS  
392 (**Figure 6A**; "B") (**Supplementary Table 2, Supplementary Table 3**). Consistent with the previous  
393 analyses performed on all origins, transcription over "B" strongly anticorrelated with origin competence

394 ( $p=2*10^{-4}$ ; **Figure 6B**) and efficiency ( $p=5*10^{-5}$ ; **Figure 6C**). When we plotted the probability of  
395 licensing ( $P_L$ ) against the probability of firing ( $P_F$ ), we identified two classes of origins: the first that  
396 aligns almost perfectly on the diagonal ( $R^2=0.99$ ; **Figure 6D**, red) contains origins that fire with high  
397 probability once licensed. The second contains on the contrary origins firing with a lower probability,  
398 even when efficiently licensed (**Figure 6D**, black). As the probability of firing ( $P_F$ ) is the product of the  
399 probability of licensing ( $P_L$ ) by the probability of firing once licensing has occurred ( $P_{FIL}$ ), the latter is  
400 defined by the ratio  $P_F/P_L$ . We then sought correlations between the total level of transcription over  
401 each ARS and the efficiency with which it is activated at the post-licensing step ( $P_{FIL}$ ). Strikingly,  
402 origins that have a high  $P_{FIL}$  are generally insensitive to transcription (**Figure 6E**, red); on the contrary,  
403 origins that have a low  $P_{FIL}$  are markedly sensitive to the levels of overlapping transcription ( $R^2=0.55$ ;  
404  $p=0.002$ ; **Figure 6E**, black). This generally holds true when the median time of firing (Hawkins et al,  
405 2013) is considered: origins with a high  $P_{FIL}$  are generally firing earlier and in a manner that is  
406 independent from transcription levels over B (**Figure 6F**, red), while, conversely, origins that have a  
407 low  $P_{FIL}$  tends to fire later when transcription over B increases ( $R^2=0.44$ ;  $p=0.009$ ; **Figure 6F**, black).

408

409 We conclude that the efficiency of origin licensing generally negatively correlates with the  
410 levels of pervasive transcription within the ARS. Interestingly, a class of origins exists for which the  
411 local levels of transcription also impact origin activation after licensing.

412

#### 413 ***Asymmetry of origin sensitivity to transcription***

414

415 It has been suggested that the ORC complex binds secondary ACS with lower affinity relative  
416 to the primary ACS (Coster & Diffley, 2017). If the affinity of ORC binding to DNA reflected its  
417 efficiency at roadblocking RNA polymerases, the existence of both primary and secondary ACSs  
418 might imply that incoming transcription upstream of the primary ACS (defined as "sense" transcription)  
419 might be roadblocked more efficiently than incoming transcription upstream of the secondary ACS  
420 (defined as "antisense" transcription). As a consequence, antisense transcription would be more  
421 susceptible to affect origin function. To assess the functional impact of this asymmetry, we turned to a  
422 natural model case, *ARS1206*, which immediately follows *HSP104*, a gene activated during heat  
423 shock (**Figure 7A**).

424

425 We cloned the *HSP104* coding sequence and the following *ARS1206* under the control of a  
426 doxycyclin-repressible promoter ( $P_{TETOFF}$ ), similar in strength and characteristics to the *HSP104*  
427 promoter (Mouaikel et al, 2013) (**Figure 7A**). We verified that the *HSP104* gene is transcribed and  
428 produces an RNA similar in size to the endogenous *HSP104* RNA (data not shown), implicating that  
429 transcription termination occurs efficiently in this construct. This is expected to allow origin function,  
430 even under conditions of the strong transcription levels induced by the TET promoter. Indeed after  
431 deletion of *ARS1*, which is present in the plasmid backbone, the plasmid could still be maintained in  
432 yeast cells, showing that it can rely on *ARS1206* for replication (data not shown; **Figure 7D**).



433 We recently showed that transcription readthrough at canonical terminators is widespread in  
434 yeast and is one important component of pervasive transcription (Candelli et al, 2018). Although  
435 *ARS1206* is active, we predicted that the low levels of transcription reading through the *HSP104*  
436 terminator might impact its efficiency in an orientation-dependent manner. To test this hypothesis, we  
437 inverted the orientation of *ARS1206* on the plasmid, so that transcription from *HSP104* would  
438 approach the origin from its secondary ACS side (**Figure 7A**). We observed equivalent levels of  
439 *HSP104* expression from plasmids containing *ARS1206* in the sense (pS) or the antisense (pAS)  
440 orientation (**Figure 7B**) and concluded that transcription termination, which would have created  
441 unstable RNAs when impaired (Libri et al, 2002), occurred still efficiently upon *ARS1206* inversion.  
442 Consistently, high resolution Northern blot analysis of the 3'-ends of the *HSP104* RNA produced by pS  
443 and pAS confirmed that the site of polyadenylation was not altered by inversion of *ARS1206* and no  
444 readthrough RNAs could be detected (**Figure 7C**). Strikingly, when pS or pAS were transformed into  
445 wild-type cells, and yeasts were grown in a medium non-selective for plasmid maintenance for the  
446 same number of generations, *ARS1206* supported plasmid maintenance more efficiently when present  
447 on the sense (pS) relative to the antisense (pAS) orientation (**Figure 7D**).

448 This result is consistent with the notion that constitutive readthrough transcription from the  
449 *HSP104* gene affects origin function more markedly when approaching *ARS1206* from the side of the  
450 secondary ACS. This result is also consistent with the notion that incoming transcription is  
451 roadblocked more efficiently by ORC binding to the primary ACS as opposed to the secondary ACS, in  
452 line with the expected lower affinity of the latter interaction. To consolidate this result, we took  
453 advantage of previous work demonstrating that the *orc2-1* mutation has a stronger impact on the  
454 binding of ORC to ACSs having a poor match to the consensus, even at permissive temperature  
455 (Hoggard et al, 2013). If binding of ORC to the ACS is the limiting factor for the functional asymmetry  
456 we observe, then affecting binding of ORC to the secondary, lower affinity site by the *orc2-1* mutation  
457 should exacerbate the instability of the pAS plasmid. Indeed, while pS could be as efficiently  
458 maintained in wild-type and *orc2-1* cells, pAS raised only sick uracil auxotroph transformants in the  
459 *orc2-1* background, indicating that it could not be efficiently propagated (**Figure 7E**).

460  
461 We conclude that although ORC binding to the primary and secondary ACS can roadblock  
462 RNAPII and participate to the shielding of origins from pervasive transcription, this protection occurs  
463 asymmetrically at origin borders.

## DISCUSSION

464  
465  
466  
467  
468  
469  
470  
471  
472  
473  
474  
475  
476  
477  
478  
479  
480  
481  
482  
483  
484  
485  
486  
487  
488  
489  
490  
491  
492  
493  
494  
495  
496  
497  
498  
499  
500  
501  
502  
503

Transcription by RNA polymerase II occurs largely beyond annotated regions and produces a wealth of non-coding RNAs. Such non-coding transcription events have the potential to alter the chromatin landscape and affect in many ways the dynamics of other chromatin-associated processes. They originate from non-canonical transcription start site usage or from transcription termination leakage, as recently shown in the yeast and mammalian systems (Vilborg *et al*, 2015; Grosso *et al*, 2015; Rutkowski *et al*, 2015; Candelli *et al*, 2018). Although the frequency of these events is generally low, the persistence of RNA polymerases is dependent on the speed of elongation and the occurrence of pausing and termination, potentially leading to significant occupancy at specific genomic locations where they could have a function. The crosstalks between transcription and replication have been traditionally analyzed in the context of strong levels of transcription, which, aside from a few specific cases, do not represent the natural exclusion of replication origins from regions of robust and generally constitutive transcription (MacAlpine & Bell, 2005; Nieduszynski *et al*, 2005; Donato *et al*, 2006). We studied here the impact of pervasive transcription on the specification and the function of replication origins. We demonstrate that origins have asymmetric properties in terms of the resistance to incoming transcription, and provide support for the *in vivo* topology of replication factors assembly at ARSs. The inherent protection of replication origins by transcription roadblocks limits the extent of transcription events within these regions. Nevertheless, polymerases that cross the roadblock borders impact both the efficiency of licensing and origin firing, demonstrating that physiological levels of pervasive transcription can shape the replication program of the cell. Importantly, since the global transcriptional landscape is sensitive to changes dictated by different physiological or stress conditions, pervasive transcription is susceptible to regulate the replication program according to cellular needs.

### ***Replication initiates in regions of active transcription***

Based on the presence and relative orientation of stable annotated transcripts, early studies have concluded that replication origins are excluded from regions of active transcription (Donato *et al*, 2006; Nieduszynski *et al*, 2005). To the light of our results it is clear that this notion needs to be revisited: if origins are generally excluded from regions of *genic* transcription, they dwell in a transcriptionally active environment populated by RNA polymerases that generate pervasive transcription events. These events have multiple origins. When ARSs are located in between divergent genes or more generally upstream of a gene, they might be exposed to natural levels of divergent transcription due to the intrinsic bidirectionality of promoters. When they are located downstream of a gene, they are potentially exposed to transcription naturally reading through termination signals (Candelli *et al*, 2018), which, depending on the level of expression of the gene and the robustness of termination signals, can be consequential.

### ***Transcription termination occurs around and within origins***



504

505           Nonetheless, origins are not porous to surrounding transcription and the presence of one ARS  
506 generates a characteristic footprint in the local RNAPII occupancy signal. When origins are oriented  
507 according to the main ORC binding site, the ACS, RNAPII signal is found to accumulate to some  
508 extent, depending on the levels of incoming transcription (**Figures 1A, 2**), and sharply decrease in  
509 correspondence of the ACS. We provide several lines of evidence supporting the notion that RNAPII is  
510 paused at the site of ORC binding and that transcription termination occurs by a roadblock  
511 mechanism. First, we observed a relative enrichment of RNA 3'-ends coinciding with the descending  
512 RNAPII signal, indicating that termination occurs at or before transcription has proceeded through the  
513 termination signal (the ACS). Second, a fraction of the RNAs produced are sensitive to exosomal  
514 degradation (Colin *et al*, 2014; Candelli *et al*, 2018). Third, mutation of the ORC binding site prevents  
515 efficient termination in our reporter system. Finally, mutational inactivation of ORC and Cdc6 erases  
516 the roadblock and allows transcription to cross the ACS at two natural model origins.

517           These findings are seemingly in contrast with earlier reports showing that inserting model  
518 ARSs in a context of strong transcription leads to transcription termination *within* ARSs independently  
519 of the ORC binding site or other sequence signals required for origin function in replication (Chen *et al*,  
520 1996; Magrath *et al*, 1998). One possibility is that the cloned fragments in these early studies  
521 accidentally contain transcription termination signals, some of which were not annotated when these  
522 experiments were performed. This is likely the case for *ARS305* and *ARS209* that both contain a CUT  
523 directed antisense to the T-rich strand-oriented ACS. *ARS416* (*ARS1*) and *ARS209*, also used in  
524 these studies, might also contain termination signals from the contiguous *TRP1* and *HHF1* genes,  
525 respectively. Another possibility is that transcription termination occurred both at the roadblock site  
526 (the ACS) and internally, but the former was missed because of the poor stability of the RNA  
527 produced. As discussed below, we also found evidence of internal termination, but preferentially when  
528 examining the fate of antisense transcription (i.e. entering the ARS from the opposite side of the main  
529 ACS oriented by its T-rich strand).

530           The transcriptional footprint observed for antisense transcription shows a large peak when  
531 origins are aligned on the main ACS but condenses into a well-defined peak when the alignment is  
532 done on the presumed secondary ORC binding sites (Coster & Diffley, 2017) (**Figure 1D**), suggesting  
533 that RNAPII indeed pauses at these sites. However, transcription termination, inferred from the  
534 distribution of RNA 3'-ends, occurs downstream of the putative secondary ACS, within the ARS body  
535 (**Figure 1E**). Because these RNAs are stable, we suggest that they are generated by CPF-dependent  
536 termination, possibly because RNAPII encounters cryptic termination signals, or because the ARS  
537 chromatin environment prompts termination. Whether the occurrence of internal termination has  
538 functional implications for origin function is unclear; nevertheless, our analyses suggest that the  
539 presence of antisense RNAPIIs within the origin is important for modulating its function (see below).

540

541           ***Topological organization of replication origin factors detected by transcriptional***  
542 ***footprinting***

543

544 We propose that the asymmetrical distribution of RNAPII at ARS borders relates to the "quasi-  
545 symmetrical" model for pre-RC assembly on chromatin, as proposed by Coster and Diffley (Coster &  
546 Diffley, 2017). Earlier data suggested that binding of a single ORC molecule at a primary ACS is  
547 necessary and sufficient to drive the deposition of one Mcm2-7 double-hexamer (DH) around one  
548 DNA molecule (Ticau *et al*, 2015). However, given the topology of ORC binding to DNA (Lee & Bell,  
549 1997; Bleichert *et al*, 2017) and the chirality of Mcm2-7 DH (Remus *et al*, 2009), a drastic  
550 conformational change would be required to assemble one Mcm2-7 DH with only one ORC (Zhai *et al*,  
551 2017; Bleichert *et al*, 2018). The quasi-symmetrical model, in contrast, postulates that two distinct  
552 ORC molecules bind cooperatively each ARS at two distinct ACS sequences. One ORC binds the  
553 "primary" ACS to load one half of the pre-RC, while the second ORC binds a "secondary", degenerate  
554 ACS, to load the other half of the pre-RC in opposite orientation (Yardimci & Walter, 2014; Coster &  
555 Diffley, 2017). Each Mcm2-7 hexamer translocating towards the other would then form the Mcm2-7  
556 DH.

557 The transcriptional footprinting profile around origins shows an antisense RNAPII signal  
558 peaking at aligned potential secondary ACSs identified by their match to the consensus (Coster &  
559 Diffley, 2017), which testifies to the general functional significance of secondary ACSs prediction. The  
560 distribution of distances between the two 5' ends of the two ACSs has a mode of 110nt, which is  
561 consistent with the expected physical occupancy of at least one Mcm2-7 DH (Remus *et al*, 2009). This  
562 distance is also consistent with the optimal distance between the two ACSs for a functional  
563 cooperation in pre-RC complex formation *in vitro* (Coster & Diffley, 2017). We show that, presumably  
564 because of the average lower affinity of ORC binding to the secondary ACS, transcription termination  
565 does not occur upstream of the latter but within the ARS, where RNAPII could favor the translocation  
566 of one Mcm2-7 hexamer towards the other, or "push" a pre-RC intermediate (Warner *et al*, 2017) or  
567 the DH away or against the high affinity ORC binding site. On a case-by-case basis, it can be  
568 envisioned that antisense transcription might even favor origin firing, or participate to the specification  
569 of the position of licensing factors (Belsky *et al*, 2015).

570

### 571 **Functional implications for pervasive transcription at ARS**

572

573 As highlighted above, early studies examined the impact of transcription on origin function by  
574 driving strong transcription through candidate ARSs (Murray & Cesareni, 1986; Snyder *et al*, 1988;  
575 Chen *et al*, 1996; Kipling & Kearsley, 1989), or estimated the transcriptional output at ARSs based on  
576 the relative orientation of stable annotated transcripts (Nieduszynski *et al*, 2005; Donato *et al*, 2006).  
577 To the light of the recent, more extensive appreciation of the transcriptional landscape, these studies  
578 did not address the impact of local, physiological levels of transcription on origin function. Our results  
579 demonstrate that the predominant presence of replication origins at the 3'-ends of annotated genes or  
580 upstream of promoters in the *S. cerevisiae* genome (MacAlpine & Bell, 2005; Nieduszynski *et al*, 2005;  
581 Donato *et al*, 2006) does not preclude ARS from being challenged by transcription. Rather, pervasive  
582 transcription is likely to play an important role in fine-tuning origin function and influence their  
583 efficiency and the timing of activation.

584           The licensing of origin is predominantly sensitive to transcription within the ARS, which might  
585 have been expected. The presence of transcribing polymerases might prevent pre-RC assembly or  
586 ORC binding to the ACS (Mori & Shirahige, 2007; Lööke *et al*, 2010). Transcription through promoters  
587 has been shown to inhibit *de novo* transcription initiation by increasing nucleosome occupancy in  
588 these regions and lead to the establishment of chromatin marks characteristic of elongating  
589 transcription. We propose that transcription through origins might induce similar changes that are  
590 susceptible to outcompete binding of ORC and/or pre-RC formation.

591           Once licensing has occurred, firing ensues a series of steps leading to Mcm2-7 DH activation.  
592 It was surprising to observe that firing once licensing has occurred is also sensitive to the levels of  
593 local pervasive transcription, possibly implying that post-licensing activation steps are also somehow  
594 sensitive to the presence of transcribing RNAPII. An alternative, interesting possibility is that  
595 transcription complexes might push the Mcm2-7 DH away from the main site of initiation (Gros *et al*,  
596 2015). As a consequence, the actual position of replication initiation would be altered with a given  
597 frequency: replication might still initiate but in a more dispersed manner around the origin and would  
598 not be taken into consideration in the computation of initiation events. A final possibility is that pre-RC  
599 formation is to some extent reversible, and transcription might alter to some extent the equilibrium by  
600 occupying ARS sequences at a post-licensing but pre-activation step. The subset of origins that we  
601 found to be insensitive to transcription might be less prone to sliding or have a slower rate of pre-RC  
602 disassembly, which would make them less likely to be influenced by transcription.

603           The topological organization of replication origins and transcription units has been studied in  
604 many organisms, with the general consensus that the replication program is relatively flexible and  
605 adapts to the changing transcriptional environment during development or cellular differentiation in  
606 multicellular organisms (Powell *et al*, 2015; Petryk *et al*, 2016; Pourkarimi *et al*, 2016). The rapidly  
607 dividing *S.cerevisiae* has maintained some of this adaptation of replication to the needs of  
608 transcription, e.g. during meiotic differentiation (Blitzblau *et al*, 2012). Origin specification nonetheless  
609 relies on a relatively strict requirement for defined ARS sequences, which is possibly more efficient,  
610 but also less flexible for adapting to alterations in the transcription program and more sensitive to  
611 pervasive transcription. Transcription termination and RNAPII pausing at origin borders are some of  
612 the strategies that shape the local pervasive transcription landscape to the profit of origin function, and  
613 mute disruptive interferences into fine tuning of origin efficiency and activity.

## MATERIAL AND METHODS

614  
615  
616  
617  
618  
619  
620  
621  
622  
623  
624  
625  
626  
627  
628  
629  
630  
631  
632  
633  
634  
635  
636  
637  
638  
639  
640  
641  
642  
643  
644  
645  
646  
647  
648  
649  
650  
651  
652  
653

### ***Yeast strains - oligonucleotides - plasmids***

Yeast strains, oligonucleotides and plasmids used in this study are reported in **Table 1**.

### ***Metagene analyses***

#### *RNAPII occupancy*

For each feature included in the analysis, we extracted the polymerase occupancy values at every position around the feature and plotted the median over all the values for that position in the final aggregate plot.

#### *Transcription termination around origins*

To estimate the extent of transcription termination around replication origins, we considered the detection of 3'-ends of polyadenylated transcripts as a proxy for termination events. We counted, for each position, the number of origins for which at least one 3'-end could be mapped at that position. We then plotted the final score per-position in the aggregate plot.

#### *Analysis of termination at ORC-ACS and nr-ACS*

ORC-ACSs are defined as the best match to the consensus under ORC ChIP peaks (Eaton *et al*, 2010). nr-ACSs are defined as sequences containing a nearly identical motif that are not occupied by ORC as defined by ChIP analysis (Eaton *et al*, 2010).

### ***Correlation between transcription and replication metrics***

For the boxplot analyses shown in **Figure 5**, we selected 190 origins out of the 228 described in Nieduszynski *et al*. (Nieduszynski *et al*, 2006) for which replication metrics were available (Hawkins *et al*, 2013) and considered the RNAPII read counts in the 100nt following the 5' end of the ACS, in the sense and antisense direction (**Supplementary Table 1**). Origins were ranked based on the transcription levels to establish two groups, one of high and one of low transcription, which were compared in terms of licensing and firing efficiencies. A Student t-test (two tailed, same variance, unpaired samples) was used to estimate the statistical significance of the differences between the two distributions of values.

For the correlation analyses shown in **Figure 6**, we selected origins with the highest levels of incoming transcription by considering a total coverage higher than 10 read counts in an area of 200 bp upstream of the area of origin activity, both on the T-rich and A-rich strand of the ACS consensus sequence (regions "A" and "C", **Figure 5**) (**Supplementary Table 2**). Then we summed the total read coverage over the area of origin activity (region "B", **Figure 5**) on both sense and antisense strand (**Supplementary Table 3**). This value was then correlated with different measures of replication activity.

### ***Secondary ACS mapping***

The coordinates of the predicted secondary ACSs are reported in **Table 2**. To map putative secondary ACS sequences, we considered a nucleotide frequency matrix for the ACS consensus

654 sequence (Coster & Diffley, 2017) and produced a PWM (Position Weight Matrix) using the function  
655 PWM from the R Bioconductor package "biostrings" using default options. We used the "matchPWM"  
656 function from "biostrings" to look for the best match for putative secondary ACSs in the range between  
657 the position +10 to +400 relative to the main ACS. We then calculated the distribution of distances  
658 between the main and the putative secondary ACSs and the distribution of matching scores  
659 (**Supplementary Figure 1**). For the metaanalyses shown in **Figure 1D-E** we restricted this analysis to  
660 a shorter range, considering that secondary ACSs located less than 70nt or more than 200nt might not  
661 be biologically significant. The position and scores of all putative sense and antisense ACSs used for  
662 the metaanalyses are shown in **Table 2**.

663

### 664 **Plasmid constructions**

665 Oligonucleotides used for cloning and plasmids raised are reported in **Table 1**. P<sub>TETOFF</sub>-  
666 *HSP104::ARS305::HSP104* P<sub>GAL1-CUP1</sub> (2 $\mu$ , *URA3*) plasmids were constructed by inserting a 548bp  
667 fragment containing the wild-type *ARS305*, as defined in OriDB v2.1.0 (<http://cerevisiae.oridb.org>;  
668 chrIII:39,158-39,706) in vector pDL454 (Porrua *et al*, 2012) by homologous recombination in yeast  
669 cells. *ARS305* was PCR amplified from genomic DNA using primers DL3370 and DL3371. Mutations  
670 in *ARS305* were obtained by inserting linkers by stitching PCR and homologous recombination in  
671 yeast in regions A, B1 and B4 corresponding to Lin4, Lin22 and Lin102, respectively (Huang &  
672 Kowalski, 1996).

673 P<sub>TETOFF</sub>-*HSP104-ARS1206* (pDL214) plasmid was constructed by inserting the *HSP104* gene  
674 and the downstream genomic region containing the *HSP104* terminator and *ARS1206* into pCM188  
675 (*ARS1*, *CEN4*, *URA3*) by homologous recombination in yeast. *ARS1* was removed from pDL214 by  
676 cleavage with NheI and repaired by homologous recombination using a fragment lacking *ARS1* to  
677 obtain "pS". P<sub>TETOFF</sub>-*HSP104-6021sra* (or "pAS") was constructed by reversing *ARS1206* orientation in  
678 "pS" using homologous recombination in yeast.

679

### 680 **RNA analyses**

681 RNAs were prepared by the hot phenol method as previously described (Libri *et al*, 2002).  
682 Northern blot analyses were performed with current protocols and membranes were hybridized to the  
683 indicated radiolabeled probe (5'-end labelled oligonucleotide probes or PCR fragments labeled by  
684 random-priming in ULTRAhyb-Oligo or ULTRAhyb ultrasensitive hybridization buffers (Ambion)) at  
685 42°C overnight. Oligonucleotides used for generating labeled probes are reported in **Table 1**. RNase  
686 H cleavage was performed by annealing 50pmoles of each oligonucleotide to 20 $\mu$ g of total RNAs in 1X  
687 RNase H buffer (NEB) followed by addition of 2U of RNase H (NEB) and incubation at 30°C for 45  
688 minutes. Reaction was stopped by addition of 200mM sodium-acetate pH 5.5 and cleavage products  
689 were phenol extracted and ethanol precipitated. Pellets were resuspended in one volume of Northern  
690 sample loading buffer and the equivalent of 10 $\mu$ g of total RNAs were analyzed by Northern blot on a  
691 2% TBE1X agarose gel. Oligonucleotides used for RNase H cleavage assay are reported in **Table 1**.

692 For RT-qPCR analyses, RNAs were reverse transcribed with 200U of M-MLV reverse  
693 transcriptase (ThermoFisher) and strand specific primers for 45 minutes at 37°C. Reactions were

694 diluted 10 times before qPCR analyses. Quantitative PCRs were performed on a LightCycler 480  
695 (Roche) in 384-Multiwell plates (Roche) in 10 $\mu$ L reactions that contained 1% of the reverse  
696 transcription mix and 0.25pmoles of each priming oligonucleotides. Quantification was performed  
697 using the  $\Delta\Delta$ Ct method. "No RT" controls were systematically analyzed in parallel. Each transcription  
698 level reported represents the mean of three independent RNA extractions each assayed in duplicate  
699 qPCRs. Error bars represent standard deviations. Oligonucleotides used for RT-qPCR are reported in  
700 **Table 1**. Unless indicated otherwise, transcription levels were normalized to *ACT1* mRNA levels.

701

### 702 ***Plasmid-loss assay***

703 Cells were transformed with the indicated *ARS1206*-borne (*CEN4*, *URA3*) plasmid and plated  
704 on complete synthetic medium lacking uracile. Single transformants were used to inoculate liquid  
705 cultures of CSM -URA that were grown to saturation. Saturated cultures were back diluted into rich  
706 medium and maintained in logarythmic phase (i.e. below 0.8 OD<sub>600</sub>) for the indicated number of  
707 generations. Aliquots were pelleted, rinsed with water and seven-fold serial dilutions were spotted on  
708 YPD and CSM -URA, starting at 0.3 OD<sub>600</sub>. Growth on YPD plates was used to infer that the same  
709 numbers of cells were spotted, while reduced numbers of cells growing on CSM -URA reflected  
710 plasmid loss over the indicated number of generations.

711

## ACKNOWLEDGMENTS

712

713 We wish to thank Etienne Schwob (IGMM, Montpellier) for providing us with the *orc2-1*, *orc5-1*  
714 and *cdc6-1* strains. Dirk Remus (MSKCC, New-York), Philippe Pasero (IGH, Montpellier) and  
715 members of both Pasero and Libri laboratories for critical reading of the manuscript and fruitful  
716 discussions. Julien Soudet and Françoise Stutz (University of Geneva, Geneva) for sharing results  
717 before publication. This work was supported by the Centre National de la Recherche Scientifique  
718 (C.N.R.S.), the Fondation pour la Recherche Medicale (F.R.M., programme équipes 2013), l'Agence  
719 National pour la Recherche (A.N.R., grant ANR-16-CE12-0022-01), the Labex Who Am I? (ANR-11-  
720 LABX-0071 and Idex ANR-11-IDEX-0005-02). T.C. and J.G. were supported by fellowships from the  
721 French Ministry of Research and the Ligue Nationale contre le Cancer (allocation GB/MA/CD/IQ –  
722 12031), respectively.

723

724

## AUTHORS CONTRIBUTION

725

726 Conceptualization: D.L., T.C., J.G.; Methodology: T.C., J.G. Software: T.C.; Analysis: D.L.,  
727 T.C., J.G.; Investigation: D.L., T.C., J.G.; Writing – Original Draft: J.G., D.L.; Writing, Review and  
728 Editing: D.L., T.C., J.G.; Funding Acquisition: J.G., D.L.; Supervision: J.G., D.L.



729  
730  
731  
732  
733  
734  
735  
736  
737  
738  
739  
740  
741  
742  
743  
744  
745  
746  
747  
748  
749  
750  
751  
752  
753  
754  
755  
756  
757  
758  
759  
760  
761  
762  
763  
764  
765  
766  
767  
768  
769  
770  
771  
772  
773  
774  
775  
776  
777  
778  
779  
780

## REFERENCES

- Azmi IF, Watanabe S, Maloney MF, Kang S, Belsky JA, MacAlpine DM, Peterson CL & Bell SP (2017) Nucleosomes influence multiple steps during replication initiation. *eLife* **6**:  
Bell SP & Labib K (2016) Chromosome Duplication in *Saccharomyces cerevisiae*. *Genetics* **203**: 1027–1067  
Bell SP & Stillman B (1992) ATP-dependent recognition of eukaryotic origins of DNA replication by a multiprotein complex. *Nature* **357**: 128–134  
Belsky JA, MacAlpine HK, Lubelsky Y, Hartemink AJ & MacAlpine DM (2015) Genome-wide chromatin footprinting reveals changes in replication origin architecture induced by pre-RC assembly. *Genes Dev.* **29**: 212–224  
Bleichert F, Botchan MR & Berger JM (2017) Mechanisms for initiating cellular DNA replication. *Science* **355**:  
Bleichert F, Leitner A, Aebersold R, Botchan MR & Berger JM (2018) Conformational control and DNA-binding mechanism of the metazoan origin recognition complex. *Proc. Natl. Acad. Sci. U. S. A.* **115**: E5906–E5915  
Blitzblau HG, Chan CS, Hochwagen A & Bell SP (2012) Separation of DNA replication from the assembly of break-competent meiotic chromosomes. *PLoS Genet.* **8**: e1002643  
Breier AM, Chatterji S & Cozzarelli NR (2004) Prediction of *Saccharomyces cerevisiae* replication origins. *Genome Biol.* **5**: R22  
Candelli T, Challal D, Briand J-B, Boulay J, Porrua O, Colin J & Libri D (2018) High-resolution transcription maps reveal the widespread impact of roadblock termination in yeast. *EMBO J.* **37**:  
Chen S, Reger R, Miller C & Hyman LE (1996) Transcriptional terminators of RNA polymerase II are associated with yeast replication origins. *Nucleic Acids Res.* **24**: 2885–2893  
Cocker JH, Piatti S, Santocanale C, Nasmyth K & Diffley JF (1996) An essential role for the Cdc6 protein in forming the pre-replicative complexes of budding yeast. *Nature* **379**: 180–182  
Colin J, Candelli T, Porrua O, Boulay J, Zhu C, Lacroute F, Steinmetz LM & Libri D (2014) Roadblock termination by reb1p restricts cryptic and readthrough transcription. *Mol. Cell* **56**: 667–680  
Coster G & Diffley JFX (2017) Bidirectional eukaryotic DNA replication is established by quasi-symmetrical helicase loading. *Science* **357**: 314–318  
Devbhandari S, Jiang J, Kumar C, Whitehouse I & Remus D (2017) Chromatin Constrains the Initiation and Elongation of DNA Replication. *Mol. Cell* **65**: 131–141  
Diffley JF & Cocker JH (1992) Protein-DNA interactions at a yeast replication origin. *Nature* **357**: 169–172  
Diffley JFX (2004) Regulation of early events in chromosome replication. *Curr. Biol. CB* **14**: R778-786  
van Dijk EL, Chen CL, d'Aubenton-Carafa Y, Gourvenec S, Kwapisz M, Roche V, Bertrand C, Silvain M, Legoix-Ne P, Loeillet S, Nicolas A, Thermes C & Morillon A (2011) XUTs are a class of Xrn1-sensitive antisense regulatory non-coding RNA in yeast. *Nature* **475**: 114–7  
Donato JJ, Chung SCC & Tye BK (2006) Genome-wide hierarchy of replication origin usage in *Saccharomyces cerevisiae*. *PLoS Genet.* **2**: e141  
Duzdevich D, Warner MD, Ticau S, Ivica NA, Bell SP & Greene EC (2015) The dynamics of eukaryotic replication initiation: origin specificity, licensing, and firing at the single-molecule level. *Mol. Cell* **58**: 483–494  
Eaton ML, Galani K, Kang S, Bell SP & MacAlpine DM (2010) Conserved nucleosome positioning defines replication origins. *Genes Dev.* **24**: 748–753  
Fang D, Lengronne A, Shi D, Forey R, Skrzypczak M, Ginalski K, Yan C, Wang X, Cao Q, Pasero P & Lou H (2017) Dbf4 recruitment by forkhead transcription factors defines an upstream rate-limiting step in determining origin firing timing. *Genes Dev.* **31**: 2405–2415  
Granneman S, Kudla G, Petfalski E & Tollervey D (2009) Identification of protein binding sites on U3 snoRNA and pre-rRNA by UV cross-linking and high-throughput analysis of cDNAs. *Proc. Natl. Acad. Sci. U. S. A.* **106**: 9613–9618

- 781 Gros J, Kumar C, Lynch G, Yadav T, Whitehouse I & Remus D (2015) Post-licensing  
782 Specification of Eukaryotic Replication Origins by Facilitated Mcm2-7 Sliding along DNA. *Mol. Cell* **60**:  
783 797–807
- 784 Grosso AR, Leite AP, Carvalho S, Matos MR, Martins FB, Vítor AC, Desterro JMP, Carmo-  
785 Fonseca M & de Almeida SF (2015) Pervasive transcription read-through promotes aberrant  
786 expression of oncogenes and RNA chimeras in renal carcinoma. *eLife* **4**:  
787 Hartwell LH, Mortimer RK, Culotti J & Culotti M (1973) Genetic Control of the Cell Division  
788 Cycle in Yeast: V. Genetic Analysis of cdc Mutants. *Genetics* **74**: 267–286
- 789 Hawkins M, Retkute R, Müller CA, Saner N, Tanaka TU, de Moura APS & Nieduszynski CA  
790 (2013) High-resolution replication profiles define the stochastic nature of genome replication initiation  
791 and termination. *Cell Rep.* **5**: 1132–1141
- 792 Hoggard T, Shor E, Müller CA, Nieduszynski CA & Fox CA (2013) A Link between ORC-origin  
793 binding mechanisms and origin activation time revealed in budding yeast. *PLoS Genet.* **9**: e1003798
- 794 Huang RY & Kowalski D (1996) Multiple DNA elements in ARS305 determine replication origin  
795 activity in a yeast chromosome. *Nucleic Acids Res.* **24**: 816–823
- 796 Jacquier A (2009) The complex eukaryotic transcriptome: unexpected pervasive transcription  
797 and novel small RNAs. *Nat Rev Genet* **10**: 833–44
- 798 Jensen TH, Jacquier A & Libri D (2013) Dealing with pervasive transcription. *Mol. Cell* **52**:  
799 473–484
- 800 Kipling D & Kearsey SE (1989) Analysis of expression of hybrid yeast genes containing ARS  
801 elements. *Mol. Gen. Genet. MGG* **218**: 531–535
- 802 Knott SRV, Peace JM, Ostrow AZ, Gan Y, Rex AE, Viggiani CJ, Tavaré S & Aparicio OM  
803 (2012) Forkhead transcription factors establish origin timing and long-range clustering in *S. cerevisiae*.  
804 *Cell* **148**: 99–111
- 805 Kurat CF, Yeeles JTP, Patel H, Early A & Diffley JFX (2017) Chromatin Controls DNA  
806 Replication Origin Selection, Lagging-Strand Synthesis, and Replication Fork Rates. *Mol. Cell* **65**:  
807 117–130
- 808 Lee DG & Bell SP (1997) Architecture of the yeast origin recognition complex bound to origins  
809 of DNA replication. *Mol. Cell. Biol.* **17**: 7159–7168
- 810 Libri D, Dower K, Boulay J, Thomsen R, Rosbash M & Jensen TH (2002) Interactions between  
811 mRNA export commitment, 3'-end quality control, and nuclear degradation. *Mol Cell Biol* **22**: 8254–66
- 812 Lipford JR & Bell SP (2001) Nucleosomes positioned by ORC facilitate the initiation of DNA  
813 replication. *Mol. Cell* **7**: 21–30
- 814 Loo S, Fox CA, Rine J, Kobayashi R, Stillman B & Bell S (1995) The origin recognition  
815 complex in silencing, cell cycle progression, and DNA replication. *Mol. Biol. Cell* **6**: 741–756
- 816 Lööke M, Reimand J, Sedman T, Sedman J, Järvinen L, Värvi S, Peil K, Kristjuhan K, Vilo J &  
817 Kristjuhan A (2010) Relicensing of transcriptionally inactivated replication origins in budding yeast. *J.*  
818 *Biol. Chem.* **285**: 40004–40011
- 819 MacAlpine DM & Bell SP (2005) A genomic view of eukaryotic DNA replication. *Chromosome*  
820 *Res. Int. J. Mol. Supramol. Evol. Asp. Chromosome Biol.* **13**: 309–326
- 821 Magrath C, Lund K, Miller CA & Hyman LE (1998) Overlapping 3'-end formation signals and  
822 ARS elements: tightly linked but functionally separable. *Gene* **222**: 69–75
- 823 Malabat C, Feuerbach F, Ma L, Saveanu C & Jacquier A (2015) Quality control of transcription  
824 start site selection by nonsense-mediated-mRNA decay. *eLife* **4**:  
825 Marahrens Y & Stillman B (1992) A yeast chromosomal origin of DNA replication defined by  
826 multiple functional elements. *Science* **255**: 817–823
- 827 Marquardt S, Hazelbaker DZ & Buratowski S (2011) Distinct RNA degradation pathways and  
828 3' extensions of yeast non-coding RNA species. *Transcription* **2**: 145–154
- 829 Mori S & Shirahige K (2007) Perturbation of the activity of replication origin by meiosis-specific  
830 transcription. *J. Biol. Chem.* **282**: 4447–4452
- 831 Mouaikel J, Causse SZ, Rougemaille M, Daubenton-Carafa Y, Blugeon C, Lemoine S, Devaux  
832 F, Darzacq X & Libri D (2013) High-frequency promoter firing links THO complex function to heavy  
833 chromatin formation. *Cell Rep.* **5**: 1082–1094

- 834 Murray JA & Cesareni G (1986) Functional analysis of the yeast plasmid partition locus STB.  
835 *EMBO J.* **5**: 3391–3399
- 836 Nieduszynski CA, Blow JJ & Donaldson AD (2005) The requirement of yeast replication  
837 origins for pre-replication complex proteins is modulated by transcription. *Nucleic Acids Res.* **33**:  
838 2410–2420
- 839 Nieduszynski CA, Knox Y & Donaldson AD (2006) Genome-wide identification of replication  
840 origins in yeast by comparative genomics. *Genes Dev.* **20**: 1874–1879
- 841 Palzkill TG & Newlon CS (1988) A yeast replication origin consists of multiple copies of a  
842 small conserved sequence. *Cell* **53**: 441–450
- 843 Parker MW, Botchan MR & Berger JM (2017) Mechanisms and regulation of DNA replication  
844 initiation in eukaryotes. *Crit. Rev. Biochem. Mol. Biol.* **52**: 107–144
- 845 Petryk N, Kahli M, d'Aubenton-Carafa Y, Jaszczyszyn Y, Shen Y, Silvain M, Thermes C, Chen  
846 C-L & Hyrien O (2016) Replication landscape of the human genome. *Nat. Commun.* **7**: 10208
- 847 Porrua O, Boudvillain M & Libri D (2016) Transcription Termination: Variations on Common  
848 Themes. *Trends Genet. TIG* **32**: 508–522
- 849 Porrua O, Hobor F, Boulay J, Kubicek K, D'Aubenton-Carafa Y, Gudipati RK, Stefl R & Libri D  
850 (2012) In vivo SELEX reveals novel sequence and structural determinants of Nrd1-Nab3-Sen1-  
851 dependent transcription termination. *EMBO J.* **31**: 3935–3948
- 852 Porrua O & Libri D (2015) Transcription termination and the control of the transcriptome: why,  
853 where and how to stop. *Nat. Rev. Mol. Cell Biol.* **16**: 190–202
- 854 Pourkarimi E, Bellush JM & Whitehouse I (2016) Spatiotemporal coupling and decoupling of  
855 gene transcription with DNA replication origins during embryogenesis in *C. elegans*. *eLife* **5**:
- 856 Powell SK, MacAlpine HK, Prinz JA, Li Y, Belsky JA & MacAlpine DM (2015) Dynamic loading  
857 and redistribution of the Mcm2-7 helicase complex through the cell cycle. *EMBO J.* **34**: 531–543
- 858 Remus D, Beuron F, Tolun G, Griffith JD, Morris EP & Diffley JFX (2009) Concerted loading of  
859 Mcm2-7 double hexamers around DNA during DNA replication origin licensing. *Cell* **139**: 719–730
- 860 Rodriguez J, Lee L, Lynch B & Tsukiyama T (2017) Nucleosome occupancy as a novel  
861 chromatin parameter for replication origin functions. *Genome Res.* **27**: 269–277
- 862 Roy K, Gabunilas J, Gillespie A, Ngo D & Chanfreau GF (2016) Common genomic elements  
863 promote transcriptional and DNA replication roadblocks. *Genome Res.* **26**: 1363–1375
- 864 Rutkowski AJ, Erhard F, L'Hernault A, Bonfert T, Schilhabel M, Crump C, Rosenstiel P,  
865 Efstathiou S, Zimmer R, Friedel CC & Dölken L (2015) Widespread disruption of host transcription  
866 termination in HSV-1 infection. *Nat. Commun.* **6**: 7126
- 867 Santocanale C & Diffley JF (1996) ORC- and Cdc6-dependent complexes at active and  
868 inactive chromosomal replication origins in *Saccharomyces cerevisiae*. *EMBO J.* **15**: 6671–6679
- 869 Schaugency P, Merran J & Corden JL (2014) Genome-wide mapping of yeast RNA  
870 polymerase II termination. *PLoS Genet.* **10**: e1004632
- 871 Shimada K, Pasero P & Gasser SM (2002) ORC and the intra-S-phase checkpoint: a  
872 threshold regulates Rad53p activation in S phase. *Genes Dev.* **16**: 3236–3252
- 873 Snyder M, Sapolsky RJ & Davis RW (1988) Transcription interferes with elements important  
874 for chromosome maintenance in *Saccharomyces cerevisiae*. *Mol. Cell. Biol.* **8**: 2184–2194
- 875 Speck C, Chen Z, Li H & Stillman B (2005) ATPase-dependent cooperative binding of ORC  
876 and Cdc6 to origin DNA. *Nat. Struct. Mol. Biol.* **12**: 965–971
- 877 Speck C & Stillman B (2007) Cdc6 ATPase activity regulates ORC x Cdc6 stability and the  
878 selection of specific DNA sequences as origins of DNA replication. *J. Biol. Chem.* **282**: 11705–11714
- 879 Stagljar I, Hübscher U & Barberis A (1999) Activation of DNA replication in yeast by  
880 recruitment of the RNA polymerase II transcription complex. *Biol. Chem.* **380**: 525–530
- 881 Tanaka S, Halter D, Livingstone-Zatchej M, Reszel B & Thoma F (1994) Transcription through  
882 the yeast origin of replication ARS1 ends at the ABFI binding site and affects extrachromosomal  
883 maintenance of minichromosomes. *Nucleic Acids Res.* **22**: 3904–3910
- 884 Ticau S, Friedman LJ, Ivica NA, Gelles J & Bell SP (2015) Single-molecule studies of origin  
885 licensing reveal mechanisms ensuring bidirectional helicase loading. *Cell* **161**: 513–525
- 886 Tuduri S, Tourrière H & Pasero P (2010) Defining replication origin efficiency using DNA fiber

- 887 assays. *Chromosome Res. Int. J. Mol. Supramol. Evol. Asp. Chromosome Biol.* **18**: 91–102
- 888 Unnikrishnan A, Gafken PR & Tsukiyama T (2010) Dynamic changes in histone acetylation
- 889 regulate origins of DNA replication. *Nat. Struct. Mol. Biol.* **17**: 430–437
- 890 Vilborg A, Passarelli MC, Yario TA, Tycowski KT & Steitz JA (2015) Widespread Inducible
- 891 Transcription Downstream of Human Genes. *Mol. Cell* **59**: 449–461
- 892 Warner MD, Azmi IF, Kang S, Zhao Y & Bell SP (2017) Replication origin-flanking roadblocks
- 893 reveal origin-licensing dynamics and altered sequence dependence. *J. Biol. Chem.* **292**: 21417–21430
- 894 Yardimci H & Walter JC (2014) Prereplication-complex formation: a molecular double take?
- 895 *Nat. Struct. Mol. Biol.* **21**: 20–25
- 896 Yuan Z, Riera A, Bai L, Sun J, Nandi S, Spanos C, Chen ZA, Barbon M, Rappsilber J, Stillman
- 897 B, Speck C & Li H (2017) Structural basis of Mcm2-7 replicative helicase loading by ORC-Cdc6 and
- 898 Cdt1. *Nat. Struct. Mol. Biol.* **24**: 316–324
- 899 Zenklusen D, Larson DR & Singer RH (2008) Single-RNA counting reveals alternative modes
- 900 of gene expression in yeast. *Nat Struct Mol Biol* **15**: 1263–71
- 901 Zhai Y, Li N, Jiang H, Huang X, Gao N & Tye BK (2017) Unique Roles of the Non-identical
- 902 MCM Subunits in DNA Replication Licensing. *Mol. Cell* **67**: 168–179

903  
904  
905  
906  
907  
908  
909  
910  
911  
912  
913  
914  
915  
916  
917  
918  
919  
920  
921  
922  
923  
924  
925  
926  
927  
928  
929

## FIGURE LEGENDS

### Figure 1: Metasite analysis of RNAPII occupancy and transcription termination at replication origins.

(A). RNAPII PAR-CLIP metaprofile at replication origins. 228 confirmed ARSs were oriented according to the direction of the T-rich strand of their proposed ACSs (blue arrow) (Nieduszynski *et al*, 2006) and aligned at the 5' ends of the oriented ACSs (red dashed line). The median number of RNAPII reads (Schaughency *et al.*, 2014) calculated for each position is plotted. Transcription proceeding along the T-rich strand of the ACS is represented in blue and considered to be sense, while transcription on the opposite strand is plotted in red and considered to be antisense. (B). Distribution of poly(A)+ RNA 3'-ends at genomic regions surrounding replication origins. Origins were oriented and anchored as in A. 3'-ends reads (Roy *et al.*, 2016) of RNAs extracted from wild-type cells (WT, blue) or cells in which both Rrp6 and Dis3 were depleted from the nucleus (*RRP6-DIS3-AA*, transparent red) were plotted. At each position around the anchor, the presence or absence of an RNA 3'-end was scored independently of the read count. (C). Scheme of replication origins anchored at different ACS sequences. Left: sense polymerases transcribing upstream of primary ACSs (blue arrows) are colored in blue, while antisense polymerases transcribing upstream of secondary ACSs (orange arrows) are colored in red. Right: ARSs oriented according to antisense transcription were aligned at the 5' ends of the primary ACSs (top, corresponds to red trace in D) or at the 5' ends of the secondary ACSs (bottom, corresponds to black trace in D). (D). RNAPII PAR-CLIP metaprofile of antisense transcription aligned either to the 5' ends of the primary (red) or the secondary (black) ACSs, as shown in C. As in A, the median number of RNAPII reads calculated for each position is plotted. (E). Distributions of RNA 3'-ends and RNAPII at genomic regions aligned at secondary ACSs. Origins were oriented and aligned as in D. At each position around the anchor, presence or absence of an RNA 3'-end was scored independently of the read count (left y-axis). The distribution of RNAPII already shown in C is reported here for comparison (right y-axis).

### Figure 2: RNAPII occupancy at individual ARS detected by CRAC analysis.

RNAPII occupancy at sites of roadblock detected upstream *ARS305* (A), *ARS413* (B), *ARS431* (C) and *ARS432.5* (or *ARS453*, D) by CRAC (Candelli *et al*, 2018). The pervasive transcriptional landscape at these ARSs is observed in wild-type cells (WT, blue) or cells bearing a mutant allele for an essential component of the CPF-CF transcription termination pathway (*rna15-2*, green) at permissive (25°C, dark colors) or non-permissive temperature (37°C, light colors). In the case of *ARS305* (A), RNAPII occupancy is also shown in cells rapidly depleted for an essential component of the NNS transcription termination pathway through the use of an auxin-inducible degron tag (Nrd1-AID; (-) Auxin: no depletion, dark pink; (+) Auxin: depletion, light pink).

939

### Figure 3: Analysis of transcription termination at *ARS305*.

(A). Scheme of the reporter system (Porrua *et al.*, 2012) used to assess termination at *ARS305*.  $P_{TETOFF}$ : doxycycline-repressible promoter;  $P_{GAL}$ : *GAL1* promoter. Termination of transcription at a



943 candidate sequence (blue) allows growth on copper containing plates while readthrough transcription  
944 inhibits the *GAL1* promoter and leads to copper sensitivity, as indicated. **(B)**. Growth assay of yeasts  
945 bearing reporters containing a Reb1-dependent terminator, (Colin *et al*, 2014, used as a positive  
946 control), or *ARS305* (lanes 1 and 3, respectively). Variants containing mutations in the Reb1 binding  
947 site (Reb1 BS "-") or the ACS sequence are spotted for comparison (lanes 2 and 4, respectively). **(C)**.  
948 Northern blot analysis of *P<sub>TET</sub>* transcripts produced in wild-type and *rrp6Δ* cells from reporters  
949 containing either a Reb1 binding site (Reb1 BS, lanes 1-2) or wild-type or mutant *ARS305* sequences,  
950 as indicated (lanes 3-8). Transcripts terminated within *ARS305* or at the *CUP1* terminator are  
951 highlighted.

952

#### 953 **Figure 4: Role of ORC in the roadblock of RNAPII at origins.**

954 **(A)**. Distribution of RNA 3'-ends at genomic regions aligned at ACS sequences recognized by ORC  
955 (ORC-ACS) as defined by Eaton et al. (Eaton et al., 2010) (i.e. defined based on the best match to the  
956 consensus associated to each ORC-ChIP peak). Each origin was oriented according to the direction of  
957 the T-rich strand of its ORC-ACS and regions were aligned at the 5' ends of the ORC-ACSs. As in **1B**,  
958 RNA 3'-ends (Roy et al., 2016) were from transcripts expressed in wild-type cells (blue) or from cells  
959 depleted for exosome components (transparent red). At each position around the anchor, presence or  
960 absence of an RNA 3'-end was scored independently of the read count. Distributions of RNA 3'-ends  
961 both on the sense (top) and the antisense (bottom) strands relative to the ORC-ACSs are plotted. **(B)**.  
962 Same as in **A** except that genomic regions were aligned at ACS sequences not recognized by ORC  
963 (nr-ACS) as defined by Eaton et al. (Eaton et al., 2010) (i.e. defined as ACS motifs for which no ORC  
964 ChIP signal could be detected). **(C)**. Quantification of the roadblock at individual ARSs. For each ARS,  
965 the snapshot includes the upstream gene representing the incoming transcription. The distribution of  
966 RNA polymerase II (dark blue) detected by CRAC (Candelli et al., 2018) at *ARS404* (left) and  
967 *ARS1004* (right) oriented according to the direction of their T-rich ACS strands is shown. The positions  
968 of the qPCR amplicons used for the RT-qPCR analyses in **D** are indicated. **(D)**. RT-qPCR analysis of  
969 transcriptional readthrough at *ARS404* and *ARS1004*. Wild-type, *orc2-1*, *orc5-1* and *cdc6-1* cells were  
970 cultured at permissive temperature and maintained at permissive (23°C, blue) or non-permissive  
971 (37°C, red) temperature for 3 hours. The level of readthrough transcription at *ARS404* (left) or  
972 *ARS1004* ACS (right) was estimated by the ratio of RT-qPCR signals after and before the ACS, as  
973 indicated. Data were corrected by measuring the efficiency of qPCR for each couple of primers in  
974 each reaction. Values represent the average of at least three independent experiments. Error bars  
975 represent standard deviation.

976

#### 977 **Figure 5: Local pervasive transcription impacts origin competence and efficiency.**

978 Transcription levels were assessed in the first 100 nt of each ARS, starting at the 5' end of the ACS,  
979 by adding RNAPII read counts (Schaughency et al., 2014) on both strands of the region. Origins were  
980 ranked based on transcription levels and the origins having the highest transcription levels (30/192,  
981 grey boxplots) were compared to the rest of the population (162/192, white boxplots). Origin metrics  
982 (licensing, **5A**, and firing efficiency, **5B**) for the two classes of origins were retrieved from (Hawkins et

983 al., 2013). Boxplots were generated with BoxPlotR (<http://shiny.chemgrid.org/boxplotr/>); center lines  
984 show the medians; box limits indicate the 25th and 75th percentiles; whiskers extend 1.5 times the  
985 interquartile range (IQR) from the 25th and 75th percentiles. Notches are  $1.58 \cdot \text{IQR} / n^{1/2}$ .

986

987 **Figure 6: Correlations between transcription and origin function.**

988 (A). Origins were first selected based on the levels of pervasive transcription to which they are  
989 exposed, calculated by adding RNAPII reads (Schaughency et al., 2014) over the "A" (sense direction)  
990 or the "C" (antisense direction) regions. For the selected ARSs, levels of pervasive transcription were  
991 then calculated over the "B" region by summing RNAPII reads over the "B<sub>a</sub>" (sense direction) and the  
992 "B<sub>as</sub>" (antisense direction) regions, as indicated in the scheme. (B). Correlation between transcription  
993 over the ARS and origin competence. (C). Correlation between transcription over the ARS and origin  
994 efficiency. (D). Identification of two classes of origins, one that fires with high probability when  
995 licensing has occurred (high P<sub>FIL</sub>, red dots) and the other that fires less efficiently once licensed (low  
996 P<sub>FIL</sub>, black dots). (E). Correlation between P<sub>FIL</sub> and transcription. The efficiency of firing at the post-  
997 licensing step correlates with the levels of pervasive transcription only for origins with low P<sub>FIL</sub> (black  
998 dots). Origins that fire very efficiently once licensing occurred (P<sub>FIL</sub> ≈ 1) are generally not sensitive to  
999 pervasive transcription (red dots). (F). Origins with a low P<sub>FIL</sub> (black dots) have a firing time that  
1000 correlates with pervasive transcription, while origins with high P<sub>FIL</sub> (red dots) fire early independently of  
1001 pervasive transcription levels.

1002

1003 **Figure 7: Asymmetry of origin sensitivity to pervasive transcription.**

1004 (A). Top: pervasive transcriptional landscape detected by RNAPII CRAC (Candelli *et al*, 2018) at  
1005 *YLL026W* (*HSP104*) and *ARS1206* in wild-type cells, both on Watson (blue) and Crick (red) strands,  
1006 at 25°C (dark colors) and 37°C (light colors). The 5' ends and the sequences of the proposed primary  
1007 ACS and the predicted secondary ACS for *ARS1206* are shown. Bottom: schemes of the reporters  
1008 containing the *HSP104* gene and *ARS1206* placed under the control of a doxycycline-repressible  
1009 promoter (*P<sub>TETOFF</sub>*). The position of the amplicon used for the qPCR in B is shown. pS and pAS differ  
1010 for the orientation of *ARS1206*, with the primary (pS) or the secondary ACS (pAS) exposed to  
1011 constitutive readthrough transcription from *HSP104*. The sequence and the organization of the  
1012 relevant region are indicated on the right for each plasmid. The positions of the oligonucleotides used  
1013 for RNaseH cleavage (black arrows) and of the probe used in C are also indicated. The sequences of  
1014 the oligonucleotides is reported in **Table 1**, with the following correspondence: cleaving oligo "a" =  
1015 DL163; Northern probe = DL164; cleaving oligo "b" = DL473; cleaving oligo "c" = DL3991; cleaving  
1016 oligo "d" = DL3994. (B). Quantification by RT-qPCR of the *HSP104* mRNA levels expressed from pS  
1017 or pAS in the presence or absence of 5µg/mL doxycycline. The position of the qPCR amplicon is  
1018 reported in A. (C). Northern blot analysis of *HSP104* transcripts extracted from wild-type cells and  
1019 subjected to RNase H treatment before electrophoresis using oligonucleotides "a-d" (positions shown  
1020 in A). All RNAs were cleaved with oligonucleotide "a" to decrease the size of the fragments analyzed  
1021 and detect small differences in size. Cleavage with oligonucleotide "b" (oligo-dT) (lanes 3, 4) allowed  
1022 erasing length heterogeneity due to poly(A) tails. Oligonucleotides "c" and "d" were added in reactions



1023 run in lanes 1 and 6, respectively, to detect possible longer products that might originate from  
1024 significant levels of transcription readthrough from *HSP104*, if the inversion of *ARS1206* were to alter  
1025 the transcription termination efficiency. Products of RNase H degradation were run on a denaturing  
1026 agarose gel and analyzed by Northern blot using a radiolabeled *HSP104* probe (position shown in **A**).  
1027 **(D)**. Stability of plasmids depending on *ARS1206* for replication as a function of ARS orientation. pS or  
1028 pAS was transformed in wild-type cells and single transformants were grown and maintained in  
1029 logarithmic phase in YPD for several generations. To assess the loss of the transformed plasmid,  
1030 cells were retrieved at the indicated number of generations and serial dilutions spotted on YPD (left) or  
1031 minimal media lacking uracile (right) for 2 or 3 days, respectively, at 30°C. **(E)**. Mutation of *ORC2*  
1032 affects more severely the stability of pAS compared to pS. Transformation of pS and pAS in wild-type  
1033 (*ORC2*, "-") or mutant (*orc2-1*, "+") cells. Pictures were taken after 5 days of incubation at permissive  
1034 temperature (23°C).

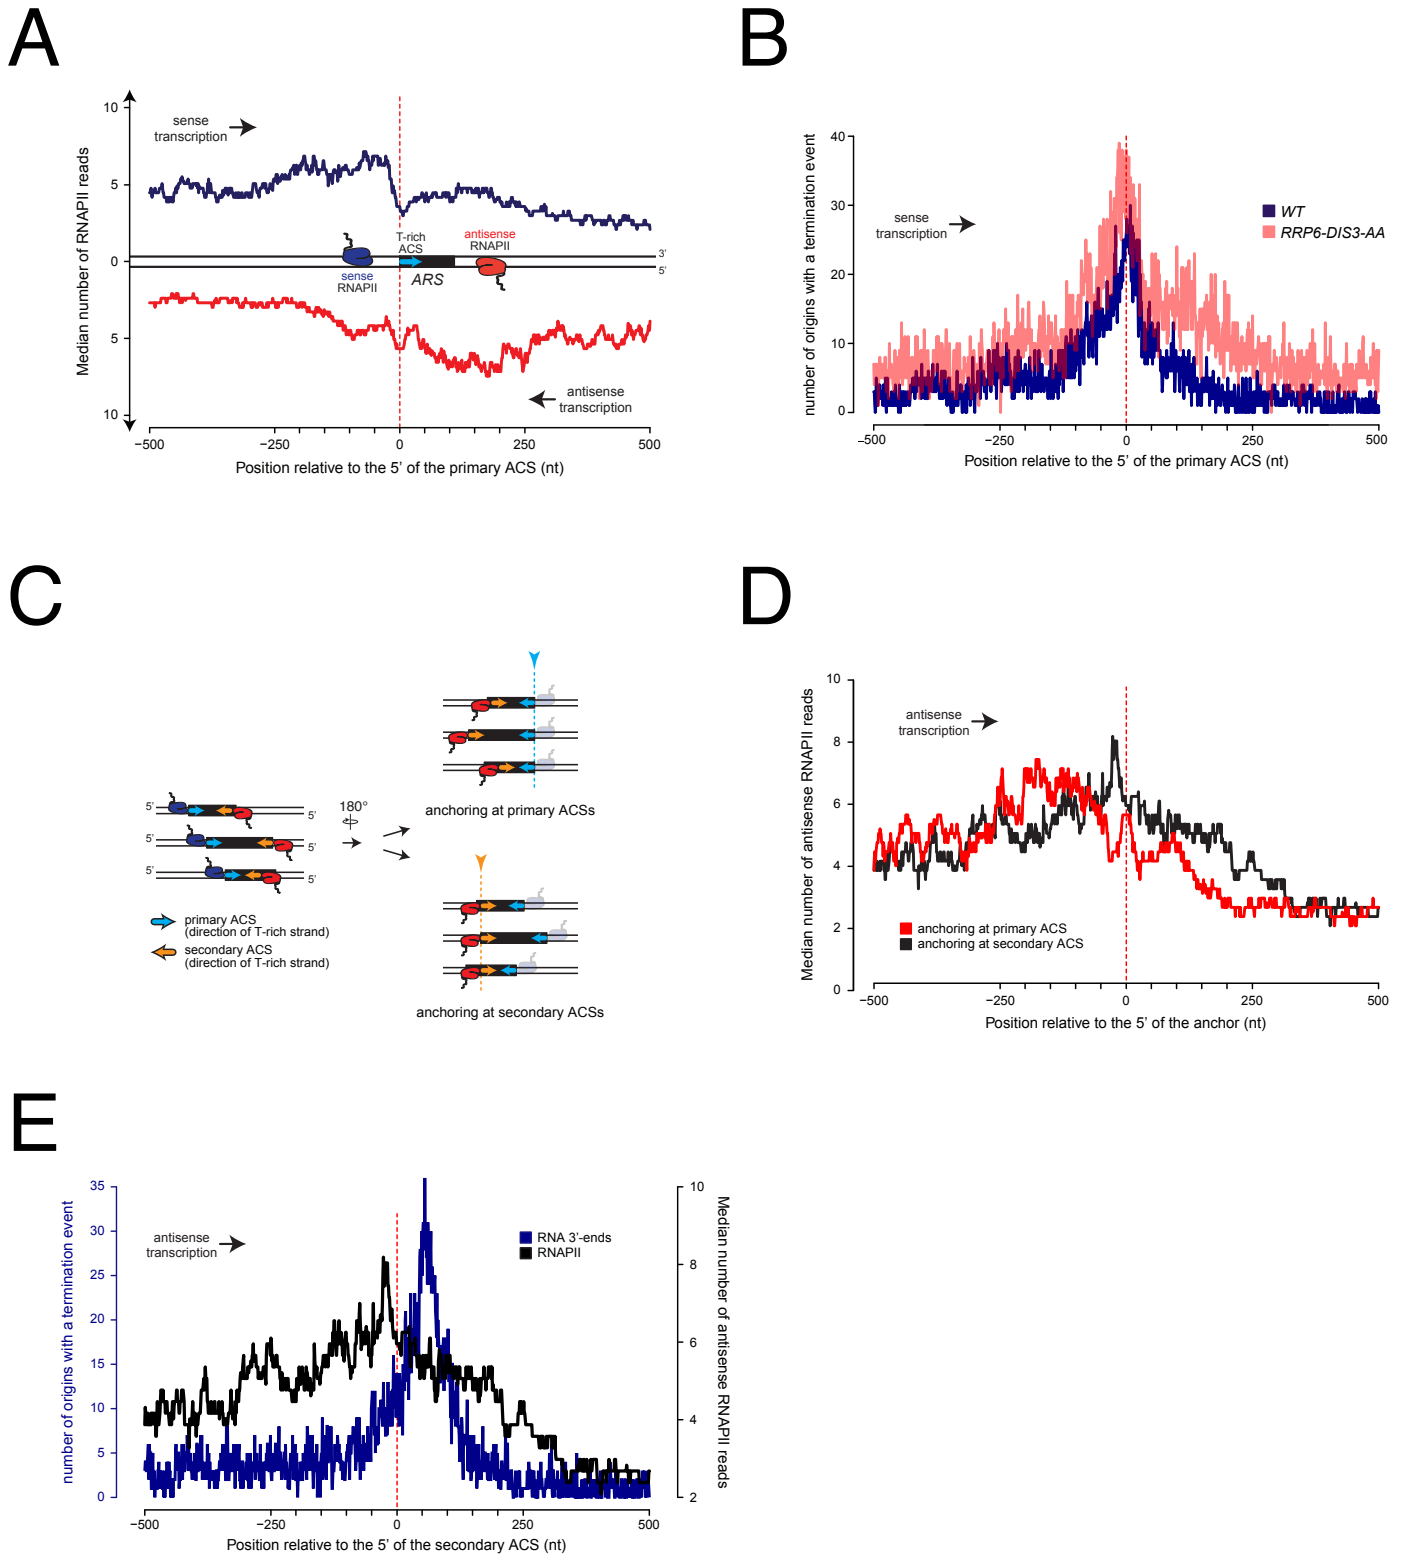

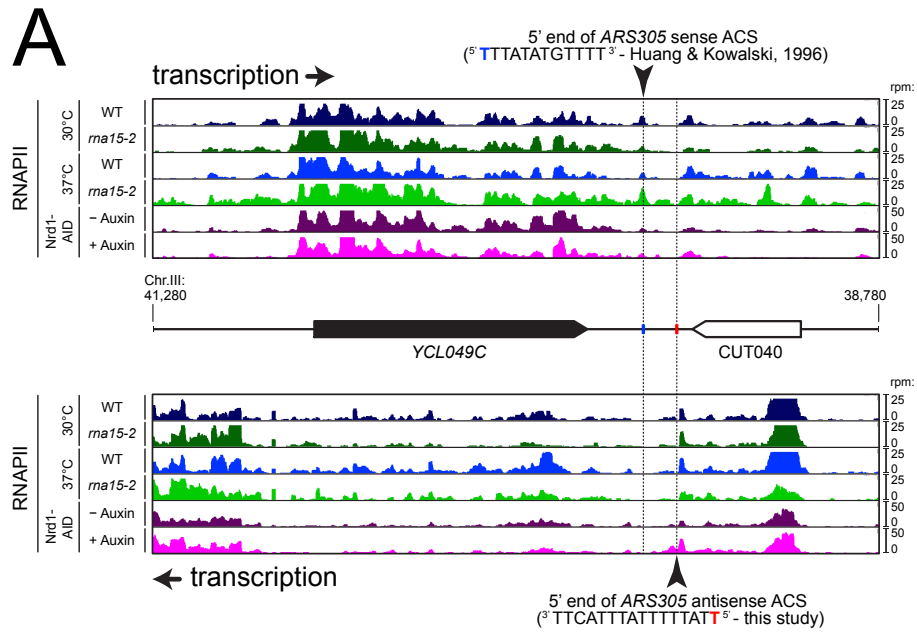

ARS305

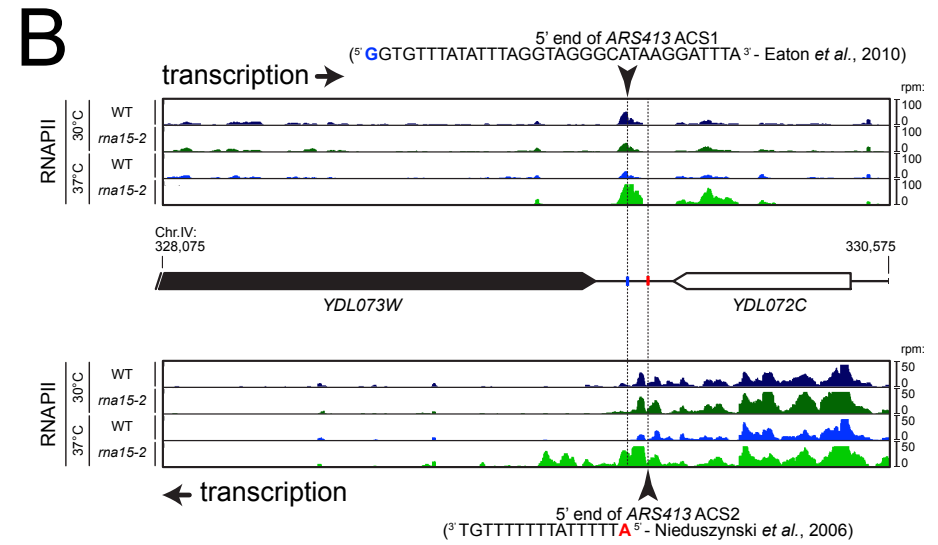

ARS413

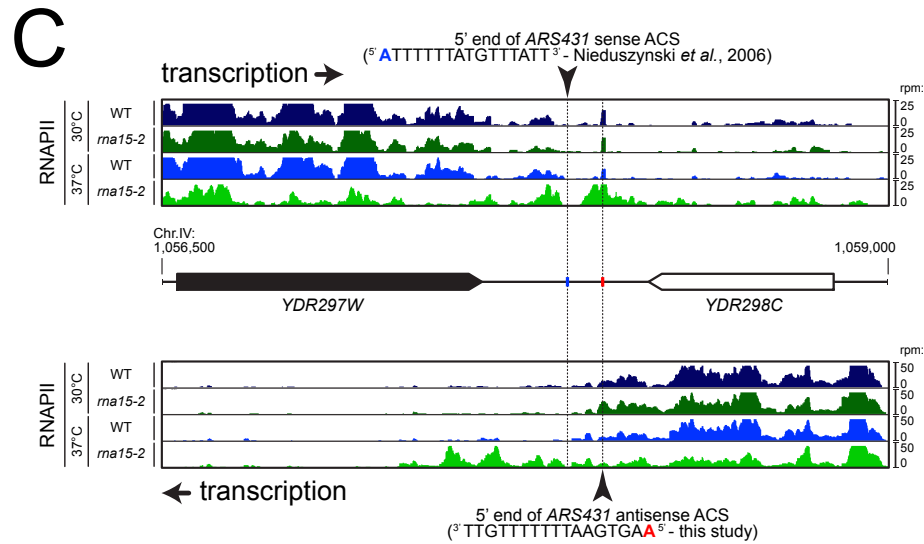

ARS431

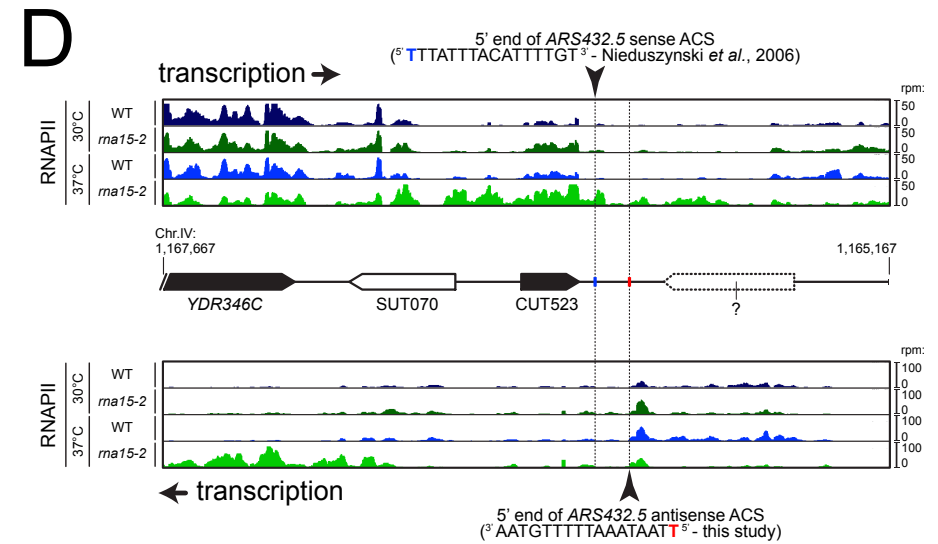

ARS432.5

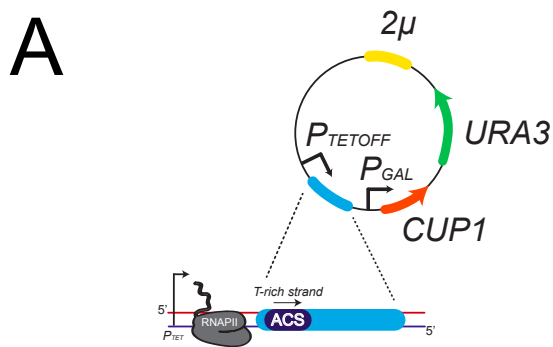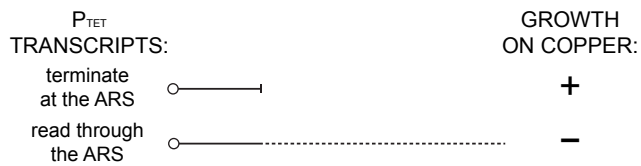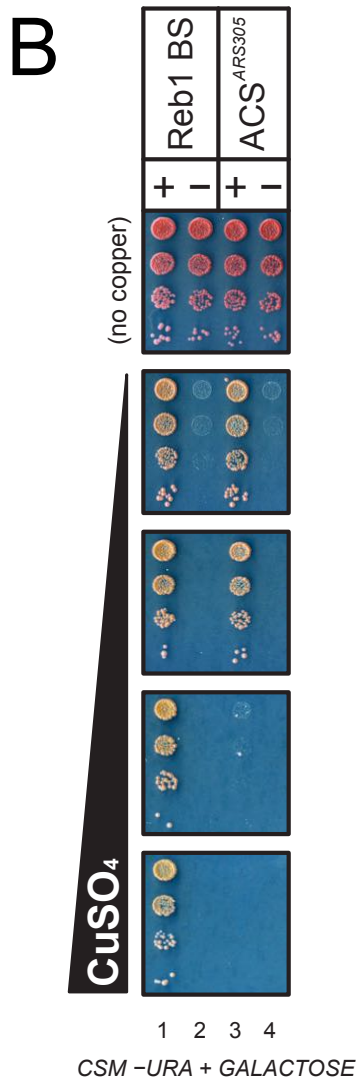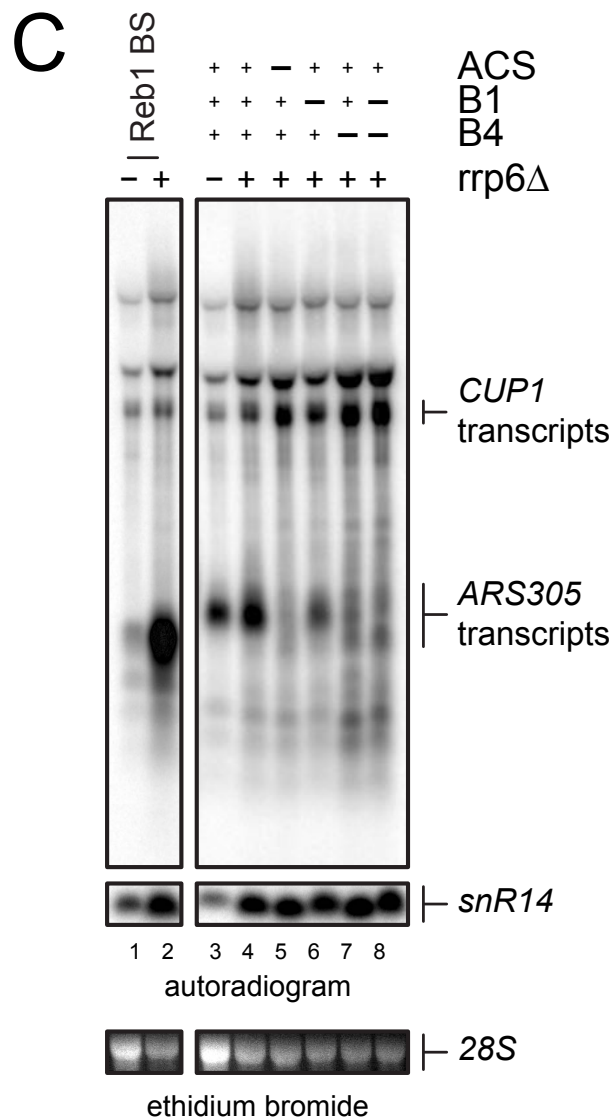

A

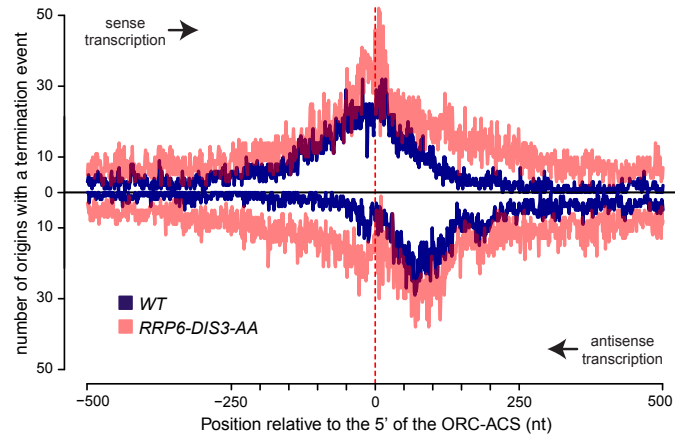

B

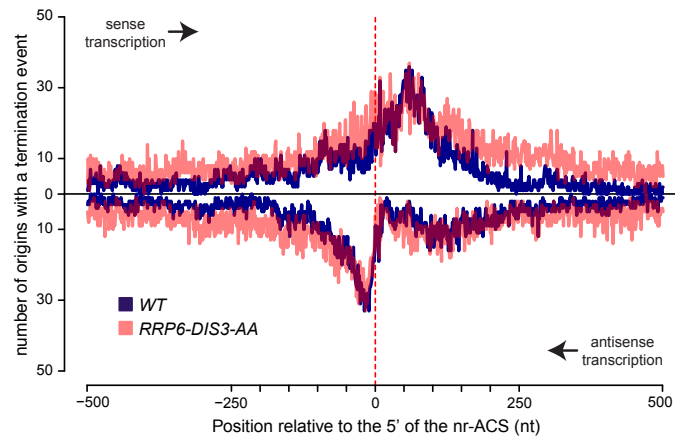

C

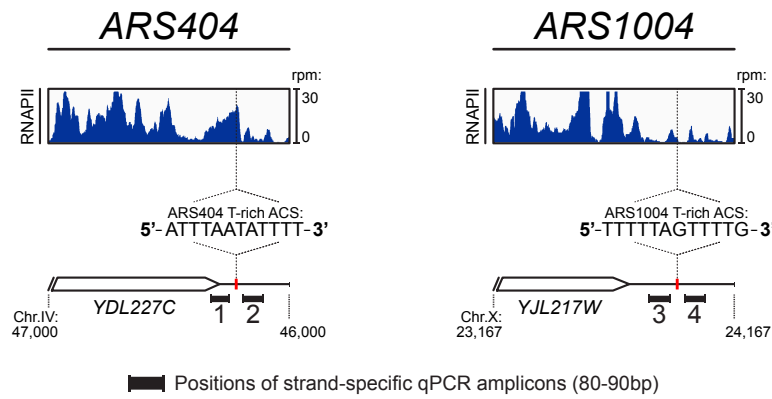

D

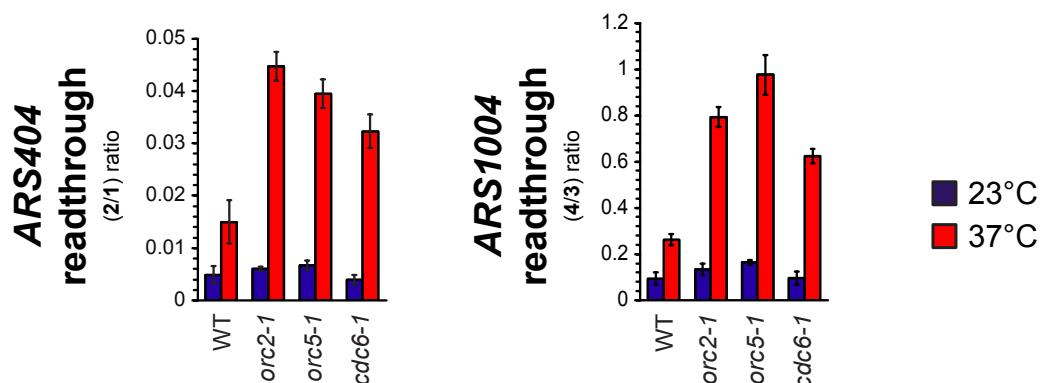

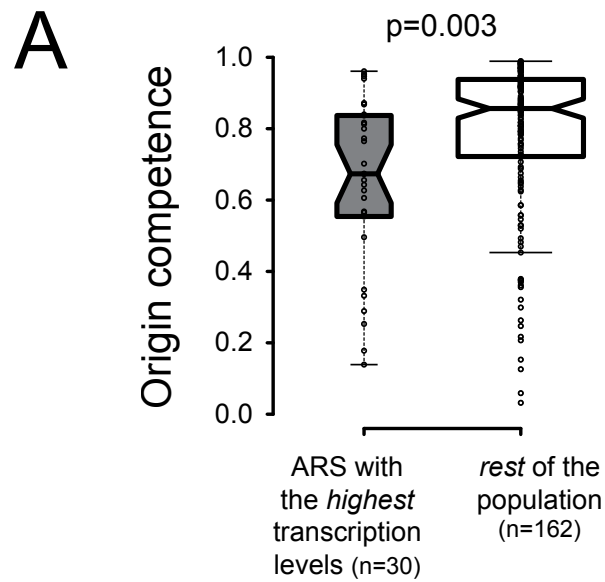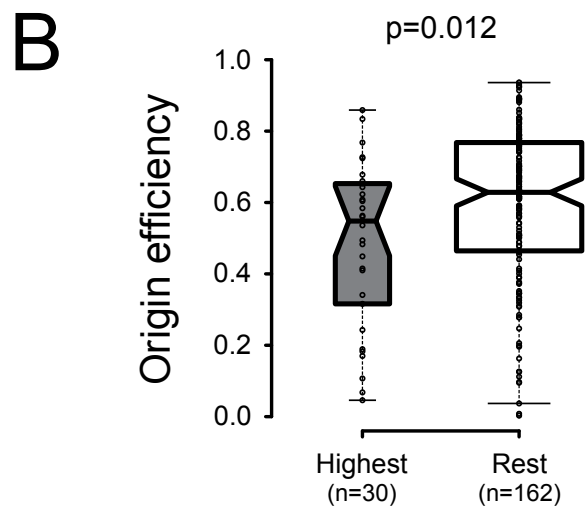



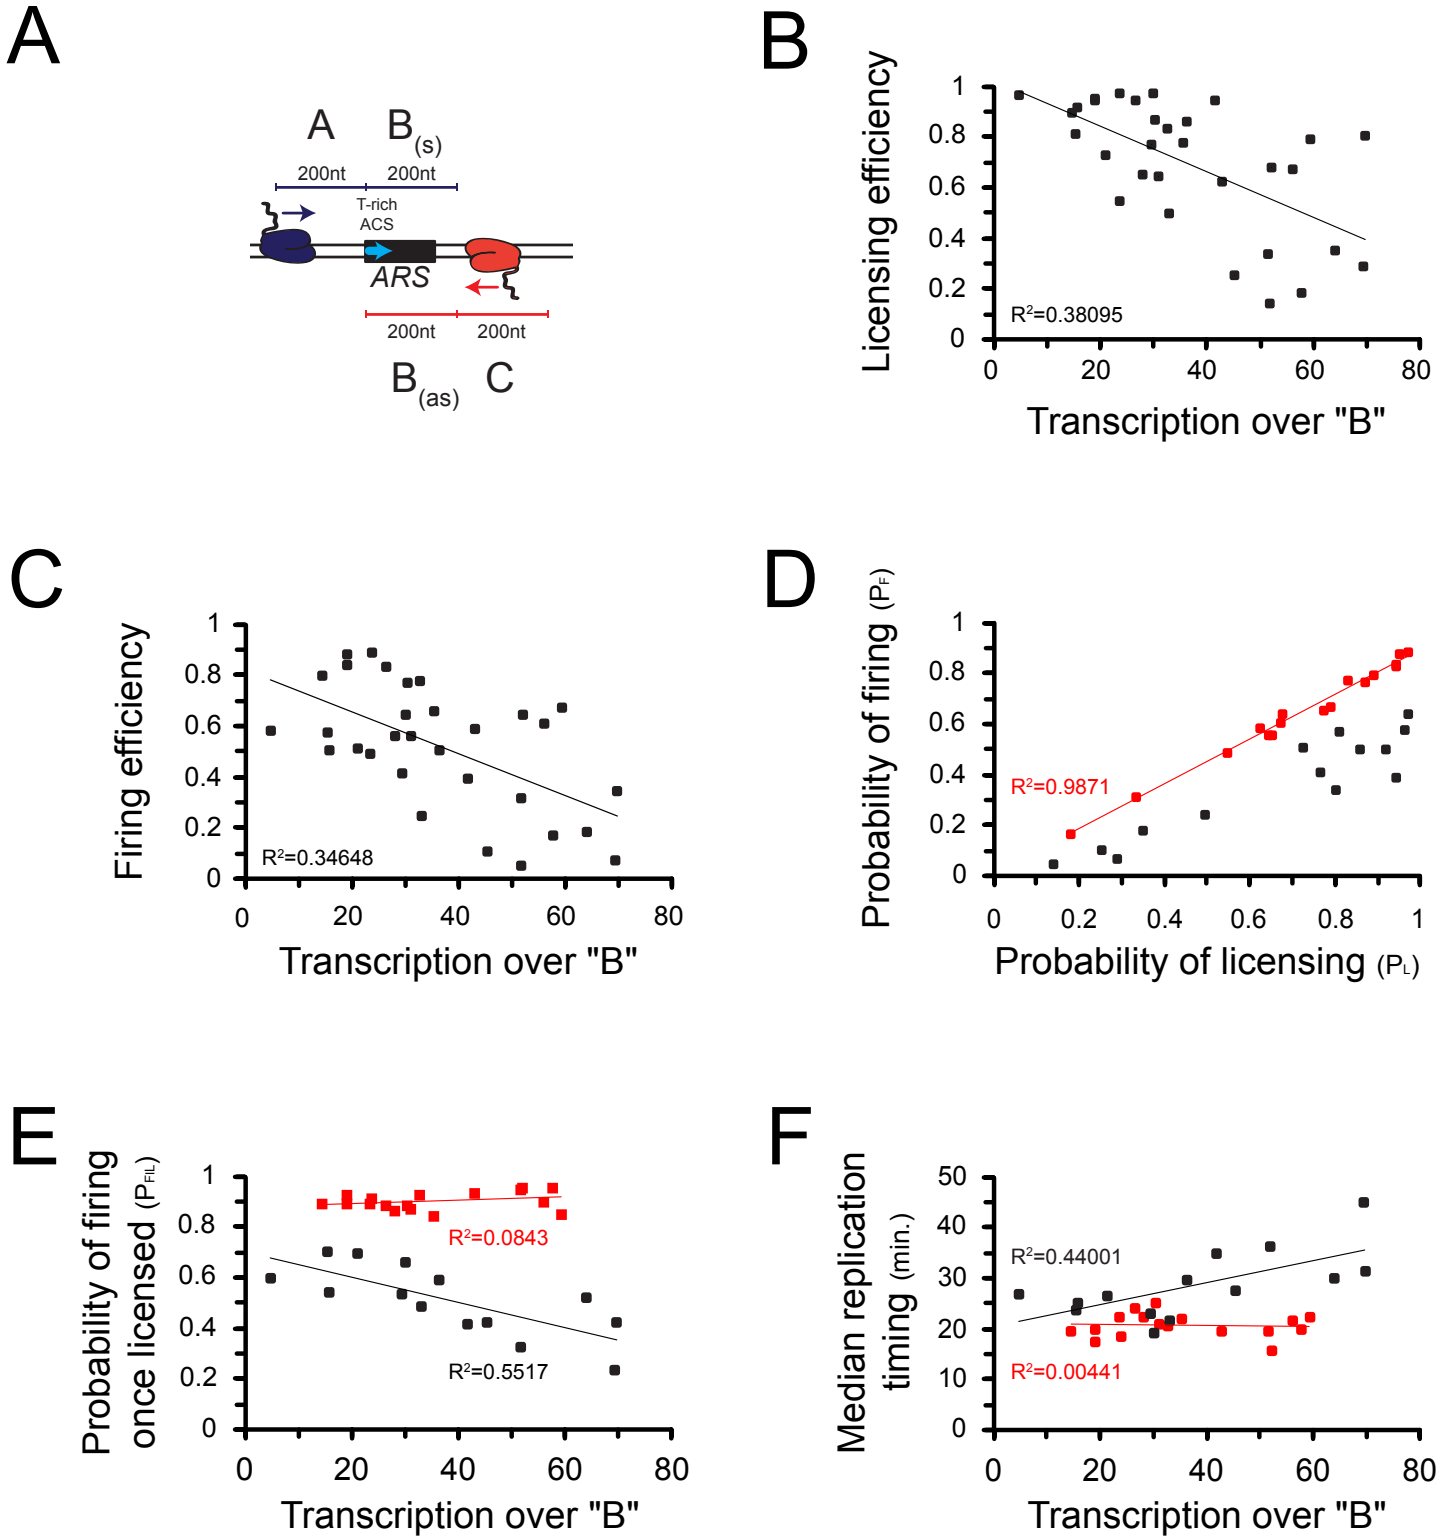

A

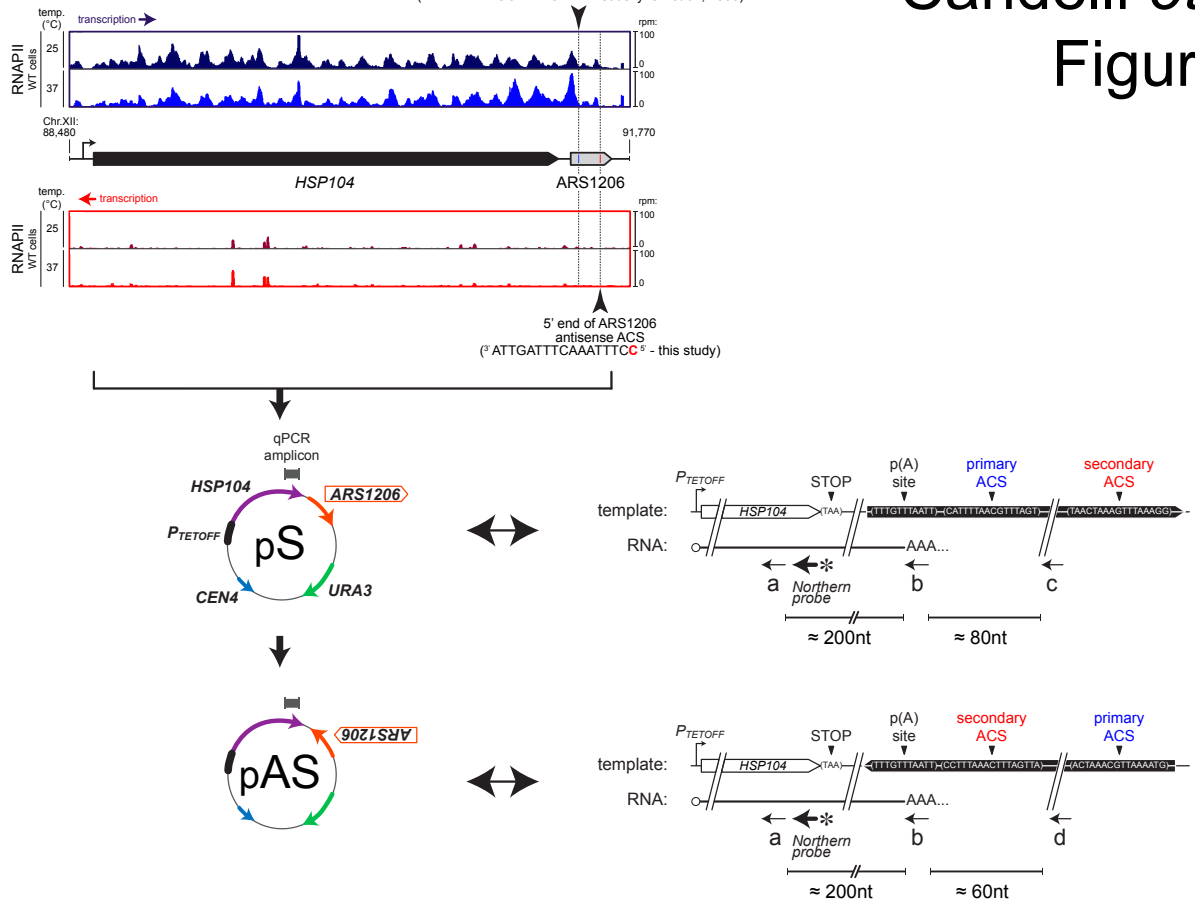

B

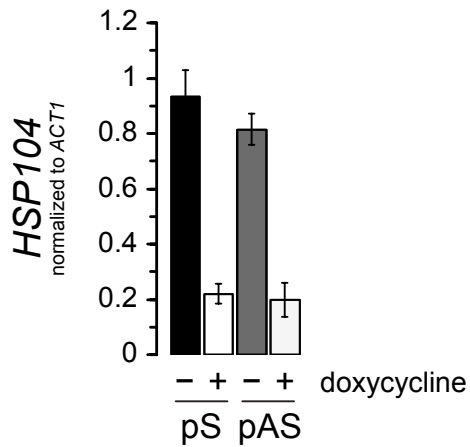

C

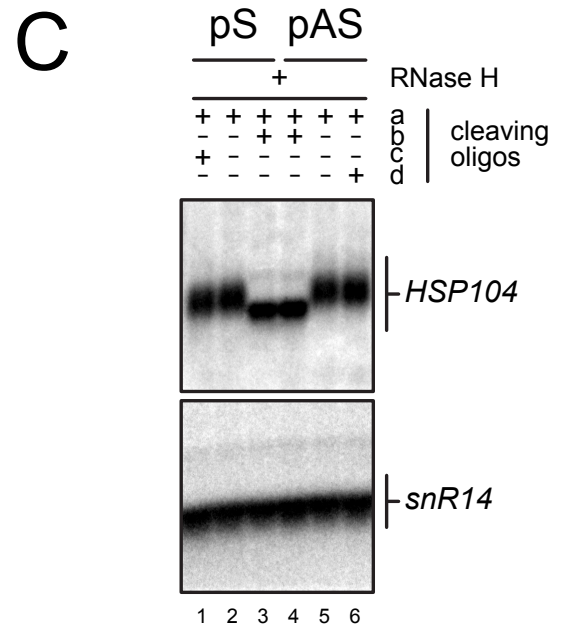

D

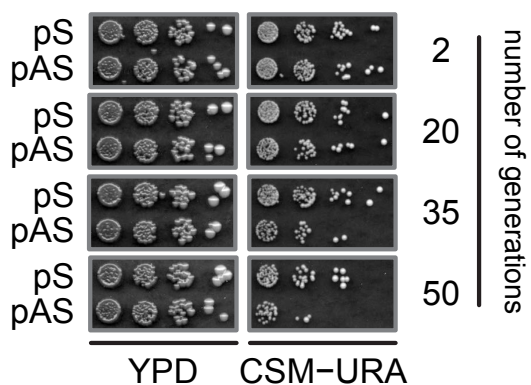

E

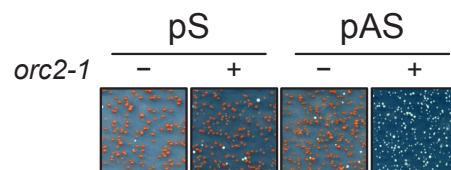

Candelli et al., Table 1

|                  | Yeast strains |                                                                                                    | Origin                                                                                                                                                                                                                                                   |                  |
|------------------|---------------|----------------------------------------------------------------------------------------------------|----------------------------------------------------------------------------------------------------------------------------------------------------------------------------------------------------------------------------------------------------------|------------------|
|                  | Name          | Genotype                                                                                           |                                                                                                                                                                                                                                                          |                  |
|                  | DLY671        | W303-1a <i>trp1Δ</i>                                                                               | Libri laboratory (BMA64)                                                                                                                                                                                                                                 |                  |
|                  | DLY2923       | W303-1a <i>ORC2 ORC5 CDC6</i>                                                                      | Gift from the Pasero laboratory (PP2583)                                                                                                                                                                                                                 |                  |
|                  | DLY2688       | as W303-1a, <i>ORC2 ORC5 cdc6-1</i>                                                                | Gift from the Schwob laboratory (E589)                                                                                                                                                                                                                   |                  |
|                  | DLY2687       | as W303-1a, <i>orc2-1 ORC5 CDC6</i>                                                                | Gift from the Schwob laboratory (E1507)                                                                                                                                                                                                                  |                  |
|                  | DLY2688       | as W303-1a, <i>ORC2 orc5-1 CDC6</i>                                                                | Gift from the Schwob laboratory (E4649)                                                                                                                                                                                                                  |                  |
| Oligonucleotides |               |                                                                                                    |                                                                                                                                                                                                                                                          |                  |
|                  | Name          | Sequence                                                                                           | Purpose                                                                                                                                                                                                                                                  |                  |
|                  | DL3370        | CATCCACAATTACAACCTATACATATTCTAGCTGCCTTCATTGAAACGGCGACGCCGACGCCGTAATAAC                             | Amplification of ARS305 from genomic DNA. Fw primer bearing 48bp of homology with DL1702.                                                                                                                                                                |                  |
|                  | DL3371        | gaatcttctcgaatcaccttatttagcaccctcggttaatgctgggATATATCAGAAACATACATATG                               | Amplification of ARS305 from genomic DNA. Rev primer bearing 50bp of homology with DL1666.                                                                                                                                                               |                  |
|                  | DL3446        | CATCCACAATTACAACCTATACATATTCTAGCTGCCTTCATTGAAACGATATATCAGAAACATACATATG                             | Insertion of ARS305 in reverse orientation (compare with primer pair DL3370 / DL3371). Rev primer bearing homology with DL1702.                                                                                                                          |                  |
|                  | DL3447        | gaatcttctcgaatcaccttatttagcaccctcggttaatgctgggGCGACGCCGACGCCGTAATAAC                               | Insertion of ARS305 in reverse orientation (compare with primer pair DL3370 / DL3371). Fwd primer bearing homology with DL1666.                                                                                                                          |                  |
|                  | DL3581        | gaatcttctcgaatcaccttatttagcaccctcggttaatgctgggGTTTCATGACTGTCCGGTGTGATT                             | Insertion of shortened ARS305, fwd (cf. DL3447). Primes 32bp downstream B4 element, removing 291bp of ARS305 "full-length" 3' end.                                                                                                                       |                  |
|                  | DL3583        | CATCCACAATTACAACCTATACATATTCTAGCTGCCTTCATTGAAACGGAGTATTGATCCTTTTTTTATTG                            | Insertion of shortened ARS305, rev (cf. DL3446). Primes 34bp upstream ARS305 ACS, removing 83bp of ARS305 "full-length" 3' end.                                                                                                                          |                  |
|                  | DL3376        | TTATTCCTCGAGGACTTTGTAGTCTTAAAGC                                                                    | Insertion of linker substitution Lin102 (B4-) in ARS305 by 2 stages overlapping PCRs. Fw primer, pair with DL3371.                                                                                                                                       |                  |
|                  | DL3377        | CTACAAGTCTCGAGGATAATAAATCACACCCGGAC                                                                | Insertion of linker substitution Lin102 (B4-) in ARS305 by 2 stages overlapping PCRs. Rev primer, pair with DL3370.                                                                                                                                      |                  |
|                  | DL3378        | GGGACCTCGAGGAAATACATAACAAAACATATAAAAAC                                                             | Insertion of linker substitution Lin22 (B1-) in ARS305 by 2 stages overlapping PCRs. Fw primer, pair with DL3371.                                                                                                                                        |                  |
|                  | DL3379        | GTTATGATTCCTCGAGGCTCCTTTAAATTTAGGATATG                                                             | Insertion of linker substitution Lin22 (B1-) in ARS305 by 2 stages overlapping PCRs. Rev primer, pair with DL3370.                                                                                                                                       |                  |
|                  | DL3380        | CATAACCCCTCGAGGATAAAAACCAACACAATAAAAAAAGG                                                          | Insertion of linker substitution Lin4 (A-) in ARS305 by 2 stages overlapping PCRs. Fw primer, pair with DL3371.                                                                                                                                          |                  |
|                  | DL3381        | GGTTTTACCTCGAGGCTTGTATTGTTTATTTC                                                                   | Insertion of linker substitution Lin4 (A-) in ARS305 by 2 stages overlapping PCRs. Rev primer, pair with DL3370.                                                                                                                                         |                  |
|                  | DL1359        | CCTTATACATAGTCTCTT                                                                                 | <i>HSP104</i> Northern PCR probe, fwd. Primes about 100nt upstream <i>HSP104</i> ATG in PTETOFF- <i>HSP104</i> plasmid series                                                                                                                            |                  |
|                  | DL1360        | ATCCCCCAATTAGTCCGG                                                                                 | <i>HSP104</i> Northern PCR probe, rev. Primes upstream BamHI site in PTETOFF- <i>HSP104</i> plasmid series                                                                                                                                               |                  |
|                  | DL377         | ATGTTCCCGATTTGCCGA                                                                                 | ACT1 Northern PCR probe / RT-qPCR amplicon, fwd.                                                                                                                                                                                                         |                  |
|                  | DL378         | acacttctggaacagctc                                                                                 | ACT1 Northern PCR probe / RT-qPCR amplicon, rev.                                                                                                                                                                                                         |                  |
|                  | DL2627        | ATTCAAAAGGGAACCCGAATGACCATTGACGAGGAGCGGTCTGTTTAT                                                   | <i>snR14</i> Northern oligo probe                                                                                                                                                                                                                        |                  |
|                  | DL3763        | CTGTGTAACAATAAATGATCCCGGTAAC                                                                       | ARS404 qRT-PCR, amplicon downstream ARS404 ACS, 5' primes 202bp after SSB1 STOP, pair with DL3764.                                                                                                                                                       |                  |
|                  | DL3764        | GACTTTTTCTTACTAGCAATCGGTGAGTAAAGACCG                                                               | ARS404 qRT-PCR, amplicon downstream ARS404 ACS, 5' primes 288bp after SSB1 STOP, pair with DL3763.                                                                                                                                                       |                  |
|                  | DL3767        | CTTTTAACTAATATACACATTTTACGAGATGCG                                                                  | ARS404 qRT-PCR, amplicon upstream ARS404 ACS, 5' primes 23bp after HO STOP, pair with DL3768.                                                                                                                                                            |                  |
|                  | DL3768        | GATGCTGTCCGGGGCCCTACAAG                                                                            | ARS404 qRT-PCR, amplicon upstream ARS404 ACS, 5' primes 60bp before HO STOP, pair with DL3767.                                                                                                                                                           |                  |
|                  | DL3823        | GGCAGTATGCTTTTAAATTTGTTTAACTCAATTTCCG                                                              | ARS1004 qRT-PCR, amplicon upstream ARS1004 ACS, 5' anneals 80bp after REE1 STOP                                                                                                                                                                          |                  |
|                  | DL3824        | GCCAGTATTTTGTAACTGTATGGATTGACTAG                                                                   | ARS1004 qRT-PCR, amplicon upstream ARS1004 ACS, 5' anneals 170bp after REE1 STOP                                                                                                                                                                         |                  |
|                  | DL3827        | GTGTTTTAAGATAAAGTGACGAAAGTTAGGGTG                                                                  | ARS1004 qRT-PCR, amplicon downstream ARS1004 ACS, 5' anneals 228bp after REE1 STOP                                                                                                                                                                       |                  |
|                  | DL3828        | CATCAATAAGTACTAATACCACGAATCAATAATAGTAAATAC                                                         | ARS1004 qRT-PCR, amplicon downstream ARS1004 ACS, 5' anneals 318bp after REE1 STOP                                                                                                                                                                       |                  |
|                  | DL187         | ACACActaaataccgcatcaattcggggatccATGACGACCAACCGCAATT                                                | Cloning of <i>HSP104</i> in pCM188, fwd.                                                                                                                                                                                                                 |                  |
|                  | DL189         | catgatcgccctcctcgagggcctagcgccgcTTAATCATAGTCATCATCAA                                               | Cloning of <i>HSP104</i> in pCM188, rev.                                                                                                                                                                                                                 |                  |
|                  | DL1124        | taatgagcagatggaatgatgatgactagattaaTTAATATAGTGTGATTTT                                               | Cloning of <i>HSP104</i> 3' UTR in pCM188- <i>HSP104</i> , fwd.                                                                                                                                                                                          |                  |
|                  | DL1125        | ATTACATATGCGGCCCTCCTGCAAGGCCCTAGCGGCCCTTTAACATGATTTGGTAGTC                                         | Cloning of <i>HSP104</i> 3' UTR in pCM188- <i>HSP104</i> , fwd.                                                                                                                                                                                          |                  |
|                  | DL4026        | CGTTTTCCCTGTTTGAATCAGAAGCAG                                                                        | ARS1 KO in pDL214 by overlapping PCRs. Fwd. Anneals 236bp after pDL214's <i>URA3</i> STOP. To be used for both 1st and 2nd step of the reaction. During 1st step, use it in combination with DL4027. During 2nd step, use it in combination with DL4030. |                  |
|                  | DL4027        | GCTAGCAAGATCGGGCTGGGCTCTCTTGCCCTCCAAC                                                              | ARS1 KO in pDL214 by overlapping PCRs. Rev. Anneals 334bp after pDL214's <i>URA3</i> STOP. To be used during 1st step in combination with DL4026.                                                                                                        |                  |
|                  | DL4029        | CAAGAGCCCGGAGCCGATTTCTGCTAGCCTTTTCTC                                                               | ARS1 KO in pDL214 by overlapping PCRs. Fwd. Anneals 746bp after pDL214's <i>URA3</i> STOP. To be used during 1st step in combination with DL4030.                                                                                                        |                  |
|                  | DL4030        | GTTACGAGGATACGGAGGAGAGG                                                                            | ARS1 KO in pDL214 by overlapping PCRs. Rev. Anneals 843bp after pDL214's <i>URA3</i> STOP. To be used for both 1st and 2nd step of the reaction. During 1st step, use it in combination with DL4029. During 2nd step, use it in combination with DL4026. |                  |
|                  | DL4032        | GTAAGGAGCATGTTGCGCACAC                                                                             | ARS1 KO in pDL214 by overlapping PCRs. Rev sequencing primer. Anneals 1157bp after pDL214's <i>URA3</i> STOP.                                                                                                                                            |                  |
|                  | DL4000        | TTCAAAATGACAGTAACATCAAAACCATTATTGTAGTACCCGATTTCTAATAATGAGCAAAAAGAGCTCACATTTAAAGC                   | Reverse ARS1206 orientation in pDL214, Fwd. Bears 55bp of homology with ARS1206 3' end (+320 to +375 after <i>HSP104</i> STOP) followed by 25bp of homology to 5' of T-rich predicted ACS (+102 to +127 after <i>HSP104</i> STOP). Pair with DL4001.     |                  |
|                  | DL4001        | TATATATAAATAAACAACATAAGGAATTTGTTAATTGAACCTGACACCCGAGCGGACCAATCCGCGTGTGTTTATAC                      | Reverse ARS1206 orientation in pDL214, Rev. Bears 55bp of homology with ARS1206 5' end (+51 to +106 after <i>HSP104</i> STOP) followed by 25bp of homology with 3' end of ARS1206 (+295 to +320 after <i>HSP104</i> STOP). Pair with DL4000.             |                  |
|                  | DL4061        | ATTATAGAATACGGGTACTAC                                                                              | Reverse ARS1206 orientation in pDL214, extension of homology region downstream ARS1206. Fwd. Primes 134bp upstream <i>CYC1</i> terminator. Pair with M13 reverse (DL2163).                                                                               |                  |
|                  | DL2163        | caggaacagctatgac                                                                                   | Reverse ARS1206 orientation in pDL214, extension of homology region downstream ARS1206. Rev.                                                                                                                                                             |                  |
|                  | DL4066        | GCTCGGGTGTCAAGTCAATTAAC                                                                            | Reverse ARS1206 orientation in pDL214, extension of homology region upstream ARS1206. Fwd. Primes 106bp downstream <i>HSP104</i> STOP. Pair with DL530.                                                                                                  |                  |
|                  | DL530         | GTTGAATTTAATCAAGAGGC                                                                               | Reverse ARS1206 orientation in pDL214, extension of homology region upstream ARS1206. Fwd. Anneals 2409-2429 in <i>HSP104</i> .                                                                                                                          |                  |
|                  | DL3986        | ctcgaagatctcgaagatctacc                                                                            | Reverse ARS1206 orientation in pDL214, Fwd sequencing primer annealing 108bp before <i>HSP104</i> STOP.                                                                                                                                                  |                  |
|                  | DL163         | acattttcaccgagattacc                                                                               | RNase H cleavage assay, <i>HSP104</i> , antisense, position 2806-2833 from <i>HSP104</i> ATG.                                                                                                                                                            |                  |
|                  | DL164         | ttatcgtaccactaacctcagccctatagactctgattgtagaacctcc                                                  | RNase H cleavage assay, <i>HSP104</i> Northern oligonucleotide probe, antisense, position 2719-2631 from <i>HSP104</i> ATG.                                                                                                                              |                  |
|                  | DL473         | TTTTTTTTTTTTTTTTTT                                                                                 | RNase H cleavage assay, Poly(GT) oligonucleotide                                                                                                                                                                                                         |                  |
|                  | DL3991        | GATTTGACGCTCCAGTGGACTTTTTTTGTCC                                                                    | RNase H cleavage assay, test <i>HSP104</i> readthrough on pDL905, antisense, position 2923-2895 from <i>HSP104</i> ATG                                                                                                                                   |                  |
|                  | DL3994        | GAAGTAAATAGTGAAGTTAAATCTGGACC                                                                      | RNase H cleavage assay, test <i>HSP104</i> readthrough on pDL907, antisense, position 2909-2879 from <i>HSP104</i> ATG                                                                                                                                   |                  |
| Plasmids         |               |                                                                                                    |                                                                                                                                                                                                                                                          |                  |
|                  | Name          | Features                                                                                           | Reference                                                                                                                                                                                                                                                |                  |
|                  | pDL454        | PTETOFF- <i>HSP104</i> ::Reb1BS:: <i>HSP104</i> , PGAL1-CUP1, 2 $\mu$ , <i>URA3</i>                | Colin et al. Mol. Cell 2014                                                                                                                                                                                                                              |                  |
|                  | pDL551        | PTETOFF- <i>HSP104</i> ::Reb1BS(-):: <i>HSP104</i> , PGAL1-CUP1, 2 $\mu$ , <i>URA3</i>             |                                                                                                                                                                                                                                                          |                  |
|                  | pDL790        | PTETOFF- <i>HSP104</i> ::ARS305 548bp:: <i>HSP104</i> , PGAL1-CUP1, 2 $\mu$ , <i>URA3</i>          | This study                                                                                                                                                                                                                                               |                  |
|                  | pDL793        | PTETOFF- <i>HSP104</i> ::ARS305(A-), 548bp:: <i>HSP104</i> , PGAL1-CUP1, 2 $\mu$ , <i>URA3</i>     |                                                                                                                                                                                                                                                          |                  |
|                  | pDL909        | PTETOFF- <i>HSP104</i> ::ARS305 175bp:: <i>HSP104</i> , PGAL1-CUP1, 2 $\mu$ , <i>URA3</i>          |                                                                                                                                                                                                                                                          |                  |
|                  | pDL910        | PTETOFF- <i>HSP104</i> ::ARS305(A-), 175bp:: <i>HSP104</i> , PGAL1-CUP1, 2 $\mu$ , <i>URA3</i>     |                                                                                                                                                                                                                                                          |                  |
|                  | pDL911        | PTETOFF- <i>HSP104</i> ::ARS305(B1-), 175bp:: <i>HSP104</i> , PGAL1-CUP1, 2 $\mu$ , <i>URA3</i>    |                                                                                                                                                                                                                                                          |                  |
|                  | pDL912        | PTETOFF- <i>HSP104</i> ::ARS305(B4-), 175bp:: <i>HSP104</i> , PGAL1-CUP1, 2 $\mu$ , <i>URA3</i>    |                                                                                                                                                                                                                                                          |                  |
|                  | pDL913        | PTETOFF- <i>HSP104</i> ::ARS305(B1-B4-), 175bp:: <i>HSP104</i> , PGAL1-CUP1, 2 $\mu$ , <i>URA3</i> |                                                                                                                                                                                                                                                          |                  |
|                  | pDL30         | PTETOFF- <i>HSP104</i> , ARS1, CEN4, <i>URA3</i>                                                   |                                                                                                                                                                                                                                                          |                  |
|                  | pDL214        | PTETOFF- <i>HSP104</i> , ARS1206, ARS1, CEN4, <i>URA3</i>                                          |                                                                                                                                                                                                                                                          | Libri laboratory |
|                  | pDL905        | PTETOFF- <i>HSP104</i> , ARS1206, $\Delta$ ars1, CEN4, <i>URA3</i>                                 |                                                                                                                                                                                                                                                          | This study       |
|                  | pDL907        | PTETOFF- <i>HSP104</i> , 6021sra, $\Delta$ ars1, CEN4, <i>URA3</i>                                 |                                                                                                                                                                                                                                                          |                  |

Candelli *et al.*, Table 2

| ID | Proposed Primary ACS (Nieduszynski <i>et al.</i> , 2006) |        |        |        |                   |             | Putative Secondary ACS (this study) |        |        |        |                    |             | Protected Length (nt) |
|----|----------------------------------------------------------|--------|--------|--------|-------------------|-------------|-------------------------------------|--------|--------|--------|--------------------|-------------|-----------------------|
|    | Chromosome                                               | Strand | Start  | End    | Match             | Score       | Chromosome                          | Strand | Start  | End    | Match              | Score       |                       |
| 1  | chrI                                                     | +      | 31001  | 31018  | TATTTTAAAGTTTGT   | 0.974909231 | chrI                                | -      | 31190  | 31173  | GTATAATATTTTAGT    | 0.87301127  | 189                   |
| 2  | chrI                                                     | -      | 70431  | 70414  | ATTTTATGTTTAGAA   | 0.949548431 | chrI                                | +      | 70251  | 70268  | ACTATCAATGTTTATC   | 0.818662772 | 180                   |
| 3  | chrI                                                     | -      | 124526 | 124509 | ATTTTATATTTAAGT   | 0.939615332 | chrI                                | +      | 124412 | 124429 | GTTTTCTCTATTTAAAT  | 0.76163459  | 114                   |
| 4  | chrI                                                     | +      | 159951 | 159968 | TTTATTTATTTAGTG   | 0.951660057 | chrI                                | -      | 160108 | 160091 | ATATAGCATAATTACTT  | 0.796339361 | 157                   |
| 5  | chrI                                                     | +      | 176234 | 176251 | TCTTTTATGTTTCTT   | 0.936946746 | chrI                                | -      | 176333 | 176316 | TAAATATGTGTTTATTA  | 0.816621821 | 99                    |
| 6  | chrII                                                    | +      | 28984  | 29001  | TCACTCTATCTTTTTA  | 0.78989004  | chrII                               | -      | 29092  | 29075  | TATAACAAAATTGGTC   | 0.767973746 | 108                   |
| 7  | chrII                                                    | -      | 63376  | 63359  | TTTTTTAAATTTTGTG  | 0.934538928 | chrII                               | +      | 63256  | 63273  | TAAAAATTTGTTTCTT   | 0.843331211 | 120                   |
| 8  | chrII                                                    | -      | 170228 | 170211 | CCAGTGAACGCTTAAAA | 0.646819795 | chrII                               | +      | 170126 | 170143 | CTTTGCTACGATTTCTT  | 0.763191826 | 102                   |
| 9  | chrII                                                    | -      | 198382 | 198365 | AACCTCAAAGTACATTG | 0.673812699 | chrII                               | +      | 198228 | 198245 | ATTATAGACTTTTCATTC | 0.772245255 | 154                   |
| 10 | chrII                                                    | -      | 237832 | 237815 | AAGGTACATAGCGATT  | 0.628400298 | chrII                               | +      | 237685 | 237702 | TTATTAAGGGTTTGGA   | 0.774836934 | 147                   |
| 11 | chrII                                                    | -      | 255040 | 255023 | AGGTAGAAGAGTTACGG | 0.617416402 | chrII                               | +      | 254892 | 254909 | TGATTTTTCATTTACT   | 0.841326164 | 148                   |
| 12 | chrII                                                    | +      | 326149 | 326166 | CTATCGAAACTTTTGT  | 0.748562634 | chrII                               | -      | 326273 | 326256 | CTTTTAATAGTTTAGGT  | 0.860235002 | 124                   |
| 13 | chrII                                                    | -      | 408006 | 407989 | TAGGAAAATATATAGAG | 0.708025047 | chrII                               | +      | 407871 | 407888 | ATATTTAAAGAGTTGAA  | 0.77590664  | 135                   |
| 14 | chrII                                                    | -      | 417974 | 417957 | TGTAGAAATGCTAGCG  | 0.67916971  | chrII                               | +      | 417844 | 417861 | AAATTTAATATTTTGA   | 0.912902242 | 130                   |
| 15 | chrII                                                    | -      | 486855 | 486838 | GAAGTCTCTCTTTCGC  | 0.639951668 | chrII                               | +      | 486735 | 486752 | ATTAATTATGTTTTCC   | 0.89533109  | 120                   |
| 16 | chrII                                                    | +      | 622713 | 622730 | TATATAGAAAGTTGCTT | 0.760778109 | chrII                               | -      | 622866 | 622849 | TTTTTGACGTTTTTTT   | 0.907808059 | 153                   |
| 17 | chrII                                                    | -      | 704289 | 704306 | CTACCAAAGTGTACCG  | 0.581803503 | chrII                               | -      | 704455 | 704438 | AATGTTTTTTTTTTTT   | 0.897759223 | 166                   |
| 18 | chrII                                                    | -      | 741746 | 741729 | CGAAAAGATATGTGGGA | 0.64946824  | chrII                               | +      | 741628 | 741645 | TAAGATCAAGTTTGGTA  | 0.824844021 | 118                   |
| 19 | chrII                                                    | +      | 757441 | 757458 | TAAATCTAAGATAGCTG | 0.682422088 | chrII                               | -      | 757613 | 757596 | GTTATATAAGTATACGT  | 0.779064174 | 172                   |
| 20 | chrII                                                    | +      | 792164 | 792181 | TATTTTCATGGTTTTAG | 0.736834685 | chrII                               | -      | 792287 | 792270 | CTTTTTAAATTCATTG   | 0.834945362 | 123                   |
| 21 | chrIII                                                   | +      | 11254  | 11271  | TTTTTTTATGTTTTTTT | 0.985847127 | chrIII                              | -      | 11400  | 11383  | GTTGAATTTGGTTAGAT  | 0.782826917 | 146                   |
| 22 | chrIII                                                   | +      | 39591  | 39574  | TTTTTATATGTTTTGT  | 0.963617028 | chrIII                              | +      | 39476  | 39493  | TTATTTTTTATTTACTT  | 0.914777509 | 115                   |
| 23 | chrIII                                                   | +      | 74518  | 74535  | TGTATTTATATTTATTT | 0.944792175 | chrIII                              | -      | 74682  | 74665  | GAGATCTTAATTTATCT  | 0.770457519 | 164                   |
| 24 | chrIII                                                   | -      | 108972 | 108955 | TTTATTTATGTTTCTT  | 0.960865701 | chrIII                              | +      | 108832 | 108849 | TAGAAATATGTTGAGTT  | 0.795588546 | 140                   |
| 25 | chrIII                                                   | +      | 132036 | 132053 | TTTGATACATGTTTATA | 0.792015393 | chrIII                              | -      | 132155 | 132138 | CTTTTATATGTTTAAAT  | 0.885104513 | 119                   |
| 26 | chrIII                                                   | +      | 166650 | 166667 | GTTTTATTCCATTATTT | 0.81768767  | chrIII                              | -      | 166768 | 166751 | ATTATTACATTTACGA   | 0.903103359 | 118                   |
| 27 | chrIII                                                   | +      | 194302 | 194319 | CTACTGCAATTTTTTAC | 0.730959168 | chrIII                              | -      | 194402 | 194385 | TGTAATTACATTTCTTA  | 0.79211775  | 100                   |
| 28 | chrIII                                                   | -      | 197559 | 197542 | AATATTCATGTTAGTA  | 0.934784063 | chrIII                              | +      | 197415 | 197432 | ATCTTAAACCTTTTTAG  | 0.797219912 | 144                   |
| 29 | chrIII                                                   | +      | 224856 | 224873 | TCAGTTTTTTTTATGTT | 0.78153895  | chrIII                              | -      | 224956 | 224939 | TTTATTTTTGTTGTTT   | 0.899494022 | 100                   |
| 30 | chrIII                                                   | -      | 273030 | 273013 | TTTTTTCAAATTTAGTT | 0.94325972  | chrIII                              | +      | 272904 | 272921 | TTTATTCAAAATTTTTT  | 0.870692365 | 126                   |
| 31 | chrIII                                                   | +      | 292584 | 292601 | TATATATATATTTATTT | 0.933162383 | chrIII                              | -      | 292695 | 292678 | TATAATAACATTTTTTA  | 0.881496782 | 111                   |
| 32 | chrIII                                                   | +      | 315872 | 315889 | TGTATATAAATTAAGTG | 0.777607317 | chrIII                              | -      | 315979 | 315962 | CATTTTTAATATCTATAT | 0.829435873 | 107                   |
| 33 | chrIV                                                    | -      | 15681  | 15664  | ATTTTTTACGTTTTCTC | 0.928797007 | chrIV                               | +      | 15525  | 15542  | TAAATCTAAGTTATTC   | 0.806599978 | 156                   |
| 34 | chrIV                                                    | -      | 86123  | 86106  | GATTTTATGTTGGGC   | 0.907628171 | chrIV                               | +      | 85996  | 86013  | CTTTATAAAGATTTTAT  | 0.843543061 | 127                   |
| 35 | chrIV                                                    | +      | 123677 | 123694 | TGTTTTCACTTTGTGTT | 0.820618605 | chrIV                               | -      | 123793 | 123776 | TTAATATATATTTAGTT  | 0.9347773   | 116                   |
| 36 | chrIV                                                    | -      | 212592 | 212575 | TTTTTTTATATTTTGT  | 0.991320747 | chrIV                               | +      | 212441 | 212458 | TTTTTTTTTTTTTTTTT  | 0.926463613 | 151                   |
| 37 | chrIV                                                    | +      | 253839 | 253856 | ATTTTTTATAGTTTTGC | 0.901024131 | chrIV                               | -      | 253948 | 253931 | TAATTTTTATCTTTAGAT | 0.940018266 | 109                   |
| 38 | chrIV                                                    | -      | 329742 | 329725 | GATTTTTATTTTTTGT  | 0.930581986 | chrIV                               | +      | 329601 | 329618 | TATTATTATTATTATTC  | 0.884653435 | 141                   |
| 39 | chrIV                                                    | +      | 408134 | 408151 | TTATATTATTTAGCG   | 0.896228674 | chrIV                               | -      | 408291 | 408274 | TTATTACATTTTTTGT   | 0.898263462 | 157                   |
| 40 | chrIV                                                    | -      | 484039 | 484022 | TTTTTTTATATTTATGT | 0.972409126 | chrIV                               | +      | 483896 | 483913 | TTGTTTGTTTCATTTCTT | 0.792451309 | 143                   |
| 41 | chrIV                                                    | -      | 505522 | 505505 | TTTTTTTATATTTTTGC | 0.95203234  | chrIV                               | +      | 505345 | 505362 | CCTTTTCACGTTTTTGC  | 0.864843823 | 177                   |
| 42 | chrIV                                                    | -      | 555401 | 555384 | AAAGTTTATGTTTTTTC | 0.925775335 | chrIV                               | +      | 555290 | 555307 | ATAAATGTTGTTTTTTT  | 0.835510567 | 111                   |
| 43 | chrIV                                                    | -      | 567681 | 567664 | TTTTTTTATGTTTGGAG | 0.946669447 | chrIV                               | +      | 567572 | 567589 | ACTTTTAATTTTTTTTT  | 0.905571442 | 109                   |
| 44 | chrIV                                                    | -      | 640068 | 640051 | TTTTTAAAGTTTGGT   | 0.951500543 | chrIV                               | +      | 639918 | 639935 | CTATAATATATTTATTC  | 0.86149187  | 150                   |

|    |         |   |         |         |                    |             |         |   |         |         |                    |             |     |
|----|---------|---|---------|---------|--------------------|-------------|---------|---|---------|---------|--------------------|-------------|-----|
| 45 | chrIV   | + | 702928  | 702945  | AAAATAATTAATGTTTT  | 0.737939741 | chrIV   | - | 703030  | 703013  | TGATTTAAAATTCTGTA  | 0.83908476  | 102 |
| 46 | chrIV   | + | 748452  | 748469  | AAATTAATTGATTAATT  | 0.822458971 | chrIV   | - | 748585  | 748568  | TTTTTTAATATTTAATA  | 0.915446997 | 133 |
| 47 | chrIV   | - | 753339  | 753322  | TTTTTTTACATTTTGCT  | 0.953908195 | chrIV   | + | 753221  | 753238  | AAACTTATTTTTTAAGC  | 0.78950557  | 118 |
| 48 | chrIV   | + | 806097  | 806114  | CTCTTCCAAATTTTAA   | 0.777746734 | chrIV   | - | 806256  | 806239  | TCATATCCTGTTTTAAA  | 0.722790604 | 159 |
| 49 | chrIV   | + | 913859  | 913876  | TTTTTTTATTTTATAT   | 0.943491396 | chrIV   | - | 913957  | 913940  | ACAATTTTTGTTTATTT  | 0.885371567 | 98  |
| 50 | chrIV   | + | 921736  | 921753  | TCTTTAATCGATTTTAA  | 0.773941597 | chrIV   | - | 921840  | 921823  | TTTGTTTATTTTTTTTT  | 0.943438157 | 104 |
| 51 | chrIV   | - | 1016854 | 1016837 | TTTGTTCACGTTTTGGA  | 0.934312886 | chrIV   | + | 1016682 | 1016699 | AGAATTCATTTTAACT   | 0.772819262 | 172 |
| 52 | chrIV   | + | 1057886 | 1057903 | TTCTTTTATTATTTTTT  | 0.899933367 | chrIV   | - | 1058017 | 1058000 | AAAGTGAATTTTTTTGT  | 0.837029199 | 131 |
| 53 | chrIV   | - | 1110139 | 1110122 | TTTTTTTATATTTTTAT  | 0.956467815 | chrIV   | + | 1109960 | 1109977 | GAATTCCTCATTTAGAT  | 0.824896005 | 179 |
| 54 | chrIV   | - | 1159452 | 1159435 | CTTTTCTAAGCTTTGAA  | 0.769370807 | chrIV   | + | 1159286 | 1159303 | ATAATTAATTTTTTTGA  | 0.889208627 | 166 |
| 55 | chrIV   | - | 1166166 | 1166149 | TCGGAATATTATTTCTT  | 0.763125812 | chrIV   | + | 1166064 | 1166081 | CTTAATAAATTTTTGTA  | 0.854045557 | 102 |
| 56 | chrIV   | + | 1240920 | 1240937 | CTTCTTGAATTTGATT   | 0.771311686 | chrIV   | - | 1241096 | 1241079 | TTTATAAAAAATTTATAT | 0.871453601 | 176 |
| 57 | chrIV   | + | 1276271 | 1276288 | TTCTTTTTCTTTTTCTC  | 0.82062871  | chrIV   | - | 1276405 | 1276388 | CAAATATATATGATCA   | 0.767679431 | 134 |
| 58 | chrIV   | - | 1302763 | 1302746 | TATATATTTAGTTAATG  | 0.795859241 | chrIV   | + | 1302616 | 1302633 | GAGTTTTACGTATTCTT  | 0.80224896  | 147 |
| 59 | chrIV   | + | 1404323 | 1404340 | TAAAATCATTTTCTTTT  | 0.829710275 | chrIV   | - | 1404511 | 1404494 | AGGATTCTTTATTACGT  | 0.774058834 | 188 |
| 60 | chrIV   | + | 1461890 | 1461907 | GAGTAACCTCTGTCCGG  | 0.624436491 | chrIV   | - | 1462038 | 1462021 | AACATTAATTGTTGTTA  | 0.790149896 | 148 |
| 61 | chrIV   | - | 1487098 | 1487081 | TTAAATTTAGTTTTTTTT | 0.870549799 | chrIV   | + | 1486965 | 1486982 | CCAATACATGATTGGAT  | 0.773138313 | 133 |
| 62 | chrV    | - | 59469   | 59452   | AATATTACATTTTGAT   | 0.935717414 | chrV    | + | 59363   | 59380   | TTTTTTTTCTTTTTTTT  | 0.922560213 | 106 |
| 63 | chrV    | + | 94055   | 94072   | CAAGTTTATATTTTGTT  | 0.938620288 | chrV    | - | 94173   | 94156   | TATGTTTAAATTATATTG | 0.79888376  | 118 |
| 64 | chrV    | - | 145714  | 145697  | CAGTTTTTTGTTTAGTT  | 0.906995194 | chrV    | + | 145608  | 145625  | TTATATAATTTTTTAGG  | 0.854409653 | 106 |
| 65 | chrV    | - | 173808  | 173791  | TAATTTTATATTTTGCC  | 0.93759113  | chrV    | + | 173704  | 173721  | TATTTATACTTTTACGG  | 0.861582181 | 104 |
| 66 | chrV    | + | 212455  | 212472  | TAAAATTTATGTTAGGT  | 0.938368393 | chrV    | - | 212555  | 212538  | CGTATACTTTTTTTGTG  | 0.794230687 | 100 |
| 67 | chrV    | + | 287567  | 287584  | TTTATTTATGTTTGTGTT | 0.988690479 | chrV    | - | 287761  | 287744  | CTTTGTTATCTTGTA    | 0.729422588 | 194 |
| 68 | chrV    | + | 353586  | 353603  | AATATTACTTTTTGGT   | 0.936542643 | chrV    | - | 353774  | 353757  | TTGAATTATGCTTATGT  | 0.812386986 | 188 |
| 69 | chrV    | - | 406906  | 406889  | TTTTTTTATATATAGTC  | 0.881971164 | chrV    | + | 406734  | 406751  | GTAATTTATGATTAATC  | 0.864888268 | 172 |
| 70 | chrV    | - | 439105  | 439088  | ATTTTTTAAAGTTTTGCG | 0.915882066 | chrV    | + | 438997  | 439014  | GGTATTCCTCTTTTTCT  | 0.814453982 | 108 |
| 71 | chrV    | + | 549589  | 549606  | TATTATTAATCTTGT    | 0.818517794 | chrV    | - | 549686  | 549669  | TAATTTAATTTTTTTTT  | 0.948482332 | 97  |
| 72 | chrVI   | - | 167738  | 167721  | TATATTTATATTTTCGT  | 0.945765544 | chrVI   | + | 167551  | 167568  | AATATTTAAATATAAGT  | 0.814242246 | 187 |
| 73 | chrVI   | + | 199397  | 199414  | TTATTTTCGAGCTTTGTC | 0.737504399 | chrVI   | - | 199507  | 199490  | ATCCATAATATTTACCT  | 0.801830214 | 110 |
| 74 | chrVI   | + | 216470  | 216487  | CATTTCTATTTTTTTTT  | 0.890722071 | chrVI   | - | 216600  | 216583  | TAATGTGATGGTTAGTT  | 0.802062704 | 130 |
| 75 | chrVI   | + | 256383  | 256366  | TTTATGTTTTTTCCGGA  | 0.701845209 | chrVI   | + | 256263  | 256280  | AAAAATCCGATCTTGT   | 0.72753389  | 120 |
| 76 | chrVII  | - | 64458   | 64441   | ATTTTTAATATTTTGTT  | 0.966859378 | chrVII  | + | 64357   | 64374   | TATTGTTATATTTAGTT  | 0.901272249 | 101 |
| 77 | chrVII  | + | 112124  | 112141  | ATTTTATACGTTTATGT  | 0.921703978 | chrVII  | - | 112271  | 112254  | ATAGTTTTTTTTTATGC  | 0.861155565 | 147 |
| 78 | chrVII  | + | 163235  | 163252  | TCATTTTATAATTTGTT  | 0.916233817 | chrVII  | - | 163378  | 163361  | GTAATATATGATTAGAA  | 0.844307348 | 143 |
| 79 | chrVII  | + | 203971  | 203988  | ATTTTTTATATTTATTA  | 0.950625858 | chrVII  | - | 204165  | 204148  | CATTTTAACTCTATAT   | 0.78805761  | 194 |
| 80 | chrVII  | + | 286003  | 286020  | TTTATTTACTTTTTAGTC | 0.933155022 | chrVII  | - | 286153  | 286136  | CTAGTAATCTTTTCAGTC | 0.747097252 | 150 |
| 81 | chrVII  | - | 352863  | 352846  | TTTAATTACGTTTAGTT  | 0.942276914 | chrVII  | + | 352758  | 352775  | TACTTTTATGATTCATT  | 0.812763403 | 105 |
| 82 | chrVII  | - | 388846  | 388829  | TTTATTTAACTTTTTGTT | 0.939702794 | chrVII  | + | 388738  | 388755  | TTAGTTCTCATTTATAA  | 0.82432824  | 108 |
| 83 | chrVII  | - | 421280  | 421263  | ATAAATTTATGTTTAGT  | 0.826708937 | chrVII  | + | 421176  | 421193  | CTATTTCAAATTTGTTT  | 0.859366438 | 104 |
| 84 | chrVII  | - | 485110  | 485093  | TTTATTTATGTTTGGCC  | 0.947613634 | chrVII  | + | 484978  | 484995  | ATCTTCAAGTTTTTCT   | 0.875154553 | 132 |
| 85 | chrVII  | - | 508907  | 508890  | CATTTTAAATGTTTGGTT | 0.923555282 | chrVII  | + | 508801  | 508818  | ATCTTTTATCTTTTATC  | 0.872797056 | 106 |
| 86 | chrVII  | - | 568660  | 568643  | AGTATTTATATTTAGCC  | 0.909439604 | chrVII  | + | 568509  | 568526  | GTCATTCATGATTTATT  | 0.834093344 | 151 |
| 87 | chrVII  | + | 574700  | 574717  | AGTATTTATGTTTGGTC  | 0.937749085 | chrVII  | - | 574854  | 574837  | TATACTCATATTTGGC   | 0.838055118 | 154 |
| 88 | chrVII  | - | 660000  | 659983  | ATATTTTATGTTTACTT  | 0.952756007 | chrVII  | + | 659904  | 659921  | TTGTTTTTTTATGTTT   | 0.823819951 | 96  |
| 89 | chrVII  | + | 715314  | 715331  | TTTGTTTATATTTGTT   | 0.970567449 | chrVII  | - | 715431  | 715414  | AATCTTTAACTTTGTGAT | 0.779912848 | 117 |
| 90 | chrVII  | + | 778013  | 778030  | CTTTTTTACCTTTTGTT  | 0.938434047 | chrVII  | - | 778193  | 778176  | AGTGTTTATATTTATTT  | 0.926919799 | 180 |
| 91 | chrVII  | - | 834664  | 834647  | TTGTATATAGTTTAGTT  | 0.854509956 | chrVII  | + | 834549  | 834566  | GGTTTTTAACTTTTCCC  | 0.830646453 | 115 |
| 92 | chrVII  | + | 888412  | 888429  | TATTTTAAATTTTTGTT  | 0.973625821 | chrVII  | - | 888567  | 888550  | TTTATATATATATATTC  | 0.823335292 | 155 |
| 93 | chrVII  | - | 977904  | 977887  | TTTTTTTAAATTTTTTAT | 0.925318963 | chrVII  | + | 977810  | 977827  | TTTTTTTAAATGATTTT  | 0.806000942 | 94  |
| 94 | chrVII  | + | 999468  | 999485  | CTTTTTTACTTTTTGGG  | 0.904948204 | chrVII  | - | 999575  | 999558  | TATTTTTTTTTTTTTTT  | 0.925871289 | 107 |
| 95 | chrVIII | - | 7755    | 7738    | TATTTTATATTTAGGT   | 0.984899843 | chrVIII | + | 7618    | 7635    | CTTGTTTATATATTA    | 0.875022851 | 137 |

|     |         |   |        |        |                    |             |         |   |        |        |                    |             |     |
|-----|---------|---|--------|--------|--------------------|-------------|---------|---|--------|--------|--------------------|-------------|-----|
| 96  | chrVIII | + | 64302  | 64319  | TAATTTTAATTTTAGTT  | 0.942262943 | chrVIII | - | 64434  | 64417  | ATTCTTTATATTTATT   | 0.922675429 | 132 |
| 97  | chrVIII | - | 133538 | 133521 | TATTTTAACATTTAGTT  | 0.959052991 | chrVIII | + | 133406 | 133423 | TTCTTTTATGTGTATGC  | 0.834208883 | 132 |
| 98  | chrVIII | + | 168597 | 168614 | TTGTGTCATATTTAGAC  | 0.799695233 | chrVIII | - | 168793 | 168776 | TATATATATATACGT    | 0.820409776 | 196 |
| 99  | chrVIII | + | 245788 | 245805 | CTATTTTATGATTAGTT  | 0.939777326 | chrVIII | - | 245940 | 245923 | CAATTTCCAAATTTAGGC | 0.831524522 | 152 |
| 100 | chrVIII | - | 392260 | 392243 | TTTTTTCTTGAGTACT   | 0.788764838 | chrVIII | + | 392088 | 392105 | ATAATTTACATTAATAT  | 0.821200767 | 172 |
| 101 | chrVIII | - | 447794 | 447777 | TATGTTTATGTTTTGTG  | 0.947093715 | chrVIII | + | 447598 | 447615 | TTGCTTAATATTTTGCA  | 0.846461752 | 196 |
| 102 | chrVIII | - | 501949 | 501932 | CGTTTATACATTTTGTT  | 0.896794884 | chrVIII | + | 501752 | 501769 | ATATTTTACGGTCTTT   | 0.824337524 | 197 |
| 103 | chrVIII | + | 556140 | 556157 | AATTTTACGTTTAGGT   | 0.969507836 | chrVIII | - | 556301 | 556284 | CATTTTAATATCTATAT  | 0.829435873 | 161 |
| 104 | chrIX   | - | 105966 | 105949 | ATTATTCATGTTTCTT   | 0.92780469  | chrIX   | + | 105812 | 105829 | AATAATAATAAATGG    | 0.754881026 | 154 |
| 105 | chrIX   | - | 136290 | 136273 | GCAGTTTATGTTTTGTT  | 0.905839044 | chrIX   | + | 136160 | 136177 | GATATCTATATTTTATA  | 0.840946348 | 130 |
| 106 | chrIX   | + | 175173 | 175190 | ATGTTTATGTTTTGTC   | 0.936874196 | chrIX   | - | 175339 | 175322 | CAATTTCAAATTTAAAA  | 0.82970169  | 166 |
| 107 | chrIX   | + | 214735 | 214752 | TTAATTTATGTTTTGTA  | 0.95530712  | chrIX   | - | 214909 | 214892 | TGTTTTTATATTTTCGT  | 0.841209426 | 174 |
| 108 | chrIX   | - | 245882 | 245865 | TTTTTAAATGTTTTGTC  | 0.962520612 | chrIX   | + | 245773 | 245790 | CCTTAAAAAGGTCTCAC  | 0.67119524  | 109 |
| 109 | chrIX   | - | 247754 | 247737 | TTTTTAAATGTTTTGTC  | 0.962520612 | chrIX   | + | 247631 | 247648 | TACATTTCTCTTTTTTT  | 0.823299168 | 123 |
| 110 | chrIX   | - | 342031 | 342014 | TTTTTAAATGTTTAGCT  | 0.961127508 | chrIX   | + | 341853 | 341870 | TAAGGCTTTGTTTGTTT  | 0.760099392 | 178 |
| 111 | chrIX   | + | 357225 | 357242 | AATTTTATATTTTGTT   | 0.983369656 | chrIX   | - | 357356 | 357339 | TATTTATAGATTTTCT   | 0.83281607  | 131 |
| 112 | chrIX   | - | 412003 | 411986 | AATTTTAAATGTTTTGTC | 0.954569521 | chrIX   | + | 411895 | 411912 | AAGGTATAAATGTAGTT  | 0.778441725 | 108 |
| 113 | chrX    | - | 7731   | 7714   | TATTTTATGTTTAGGT   | 0.992509265 | chrX    | + | 7570   | 7587   | CATTTTAATATCTATAT  | 0.829435873 | 161 |
| 114 | chrX    | - | 67714  | 67697  | CTTTTTTATTTTTTTT   | 0.944897067 | chrX    | + | 67593  | 67610  | AAAATTAATAAATTTCC  | 0.769826733 | 121 |
| 115 | chrX    | + | 99498  | 99515  | TTTTTAAATTTTTTTT   | 0.947088854 | chrX    | - | 99625  | 99608  | TTTATTTATGTTTGTT   | 0.988690479 | 127 |
| 116 | chrX    | + | 298616 | 298633 | TGACTCTAACCAGTT    | 0.666661983 | chrX    | - | 298725 | 298708 | CTAATAAAACTTTTTCC  | 0.801772328 | 109 |
| 117 | chrX    | + | 337049 | 337066 | CTTAAATAAGGTGAAGA  | 0.678459288 | chrX    | - | 337193 | 337176 | CTCTTGCTTGTTTAGTT  | 0.819488866 | 144 |
| 118 | chrX    | + | 374633 | 374650 | AATTACTACAATTTTCG  | 0.788091986 | chrX    | - | 374774 | 374757 | GAAATTTACATTTATTT  | 0.914653679 | 141 |
| 119 | chrX    | - | 375586 | 375569 | TTAGTGCAAATATGAG   | 0.674815863 | chrX    | + | 375403 | 375420 | TTCTTTAAACTTTTTGA  | 0.856145267 | 183 |
| 120 | chrX    | - | 417088 | 417071 | TTGATGCACTATCATGA  | 0.704755133 | chrX    | + | 416918 | 416935 | GATTTCTATGTTCTCGA  | 0.808544598 | 170 |
| 121 | chrX    | + | 540294 | 540311 | GGGTAATAATGCGCTGTA | 0.572247037 | chrX    | - | 540461 | 540444 | AAAAATGACTTCCAGTT  | 0.755451504 | 167 |
| 122 | chrX    | - | 612772 | 612755 | CACCAACAAATTGACAG  | 0.600434727 | chrX    | + | 612662 | 612679 | GGATTTTATAATTGTGG  | 0.785437954 | 110 |
| 123 | chrX    | - | 654253 | 654236 | TAAAGTTAACGTAACCA  | 0.631991513 | chrX    | + | 654127 | 654144 | TCAAACCTTGATTTGTT  | 0.783019587 | 126 |
| 124 | chrX    | + | 683708 | 683725 | CAGATAAACAGCATAT   | 0.624200951 | chrX    | - | 683904 | 683887 | GTATTGTACATTTACCT  | 0.826577659 | 196 |
| 125 | chrX    | + | 711652 | 711669 | ATTTCTAATGCCCTTGAT | 0.672178619 | chrX    | + | 711852 | 711835 | TTTGTTCACTGTTAGTT  | 0.872596683 | 200 |
| 126 | chrX    | + | 729810 | 729827 | TAGTTGAATAAATTCGTA | 0.742850129 | chrX    | - | 729989 | 729972 | CGATTAAGCGTTTTGCC  | 0.743397787 | 179 |
| 127 | chrX    | - | 736901 | 736884 | CAATTGGAAAATTAGTG  | 0.76415065  | chrX    | + | 736789 | 736806 | TGTTTGAGTGTTTAGGT  | 0.744514544 | 112 |
| 128 | chrX    | + | 744625 | 744642 | TAATTAGCACTTCTCCC  | 0.637153506 | chrX    | - | 744819 | 744802 | GTAATATAACTGTACTC  | 0.72903611  | 194 |
| 129 | chrXI   | - | 55866  | 55849  | TTTCATTAATGTTTAGTT | 0.937267458 | chrXI   | + | 55685  | 55702  | ATTTTTCATCTTTATTA  | 0.906973964 | 181 |
| 130 | chrXI   | + | 98384  | 98401  | TTTTTTATGTTTAGTT   | 0.969509169 | chrXI   | - | 98530  | 98513  | GTACTTTATTTTTGGTT  | 0.851436401 | 146 |
| 131 | chrXI   | - | 153120 | 153103 | AATTTTTACAATTTGTC  | 0.919552201 | chrXI   | + | 152995 | 153012 | TAGTTATAAGATTATCT  | 0.841554901 | 125 |
| 132 | chrXI   | - | 196216 | 196199 | TTTTTTCATTTTTTGTT  | 0.951572253 | chrXI   | + | 196020 | 196037 | TTTGCTCATTTTTAAGT  | 0.795946302 | 196 |
| 133 | chrXI   | - | 213317 | 213300 | AGAGTTTGTCATTACCA  | 0.719440701 | chrXI   | + | 213207 | 213224 | ATTAATAATCTGTATTT  | 0.803703635 | 110 |
| 134 | chrXI   | - | 329497 | 329480 | GGTACTGAAATTTCCGT  | 0.675926258 | chrXI   | + | 329388 | 329405 | AAAATTTCTTGATGTGTT | 0.785345702 | 109 |
| 135 | chrXI   | + | 388665 | 388682 | GGTGTTTAAAGGGTAAAT | 0.710373823 | chrXI   | - | 388761 | 388744 | TTGTTTTAGTTAGTA    | 0.833546833 | 113 |
| 136 | chrXI   | + | 416880 | 416897 | CGCGAGATCCATAGGCT  | 0.528888624 | chrXI   | - | 416990 | 416973 | TATATCTTGATTGGAT   | 0.835644767 | 110 |
| 137 | chrXI   | - | 447845 | 447828 | CACATACATATTTAAC   | 0.785193796 | chrXI   | + | 447678 | 447695 | GTAATAAATATTTCTCAT | 0.786845724 | 167 |
| 138 | chrXI   | + | 516676 | 516693 | ACTTGTTATGTTTATGT  | 0.80432569  | chrXI   | - | 516825 | 516808 | CATAATTGCCTTTTCTT  | 0.777169896 | 149 |
| 139 | chrXI   | + | 581535 | 581552 | ACTATGTATCTTGCGAT  | 0.639967512 | chrXI   | - | 581699 | 581682 | TATTTTTTAAATTATGC  | 0.885914166 | 164 |
| 140 | chrXI   | - | 612054 | 612037 | TTTGGATTACATTAACG  | 0.610536381 | chrXI   | + | 611861 | 611878 | GAGAATGACGATTCGGT  | 0.681607383 | 193 |
| 141 | chrXI   | + | 642416 | 642433 | GGATGCGACATTTAACT  | 0.658787349 | chrXI   | - | 642546 | 642529 | CGCTTATATGTTGGTAT  | 0.720382898 | 130 |
| 142 | chrXII  | + | 91467  | 91484  | CATTTTAAACGTTTAGTT | 0.947368024 | chrXII  | - | 91595  | 91578  | TCCTTTAAACTTTAGTT  | 0.864360818 | 128 |
| 143 | chrXII  | + | 156701 | 156718 | TGATTTTACTTTTTGGA  | 0.897074392 | chrXII  | - | 156822 | 156805 | TAAGATTACGTTTTTAA  | 0.861864859 | 121 |
| 144 | chrXII  | + | 231249 | 231266 | TTTGTTTATATTTTTGT  | 0.950585996 | chrXII  | - | 231358 | 231341 | GTTGTTTAGTTTTATTT  | 0.830642974 | 109 |
| 145 | chrXII  | - | 289420 | 289403 | AAAATTAATGTTTTGCT  | 0.929806448 | chrXII  | + | 289325 | 289342 | TATATCTTCTTTATAT   | 0.811743224 | 95  |
| 146 | chrXII  | - | 373327 | 373310 | TTTTTTTATATTTTCTC  | 0.944189014 | chrXII  | + | 373227 | 373244 | TTGATAAAGGTTTGTC   | 0.807458273 | 100 |



|     |         |   |         |         |                    |             |         |   |         |         |                    |             |     |
|-----|---------|---|---------|---------|--------------------|-------------|---------|---|---------|---------|--------------------|-------------|-----|
| 147 | chrXII  | - | 412852  | 412835  | ATGTTTTTGTGTTTGT   | 0.918453308 | chrXII  | + | 412678  | 412695  | GTTTTGTACCTTTAGCT  | 0.848513235 | 174 |
| 148 | chrXII  | - | 450659  | 450642  | TTTTTTTATATCTTGCT  | 0.878438397 | chrXII  | + | 450505  | 450522  | CGTTTTTATGTTTATTC  | 0.924039943 | 154 |
| 149 | chrXII  | - | 459090  | 459073  | ATTGTTTATGTTTGTG   | 0.940327272 | chrXII  | + | 458995  | 459012  | CTATTCTATGTTTCTT   | 0.886167882 | 95  |
| 150 | chrXII  | - | 513083  | 513066  | TTTATTATGTTTTGT    | 0.968709027 | chrXII  | + | 512958  | 512975  | ATTATAAACATTTTATA  | 0.845822907 | 125 |
| 151 | chrXII  | - | 603109  | 603092  | TTTTTAAATGTTTATG   | 0.962915946 | chrXII  | + | 602997  | 603014  | GTTTTTATCAGTTTCAT  | 0.801484796 | 112 |
| 152 | chrXII  | + | 659892  | 659909  | GCTTTTTATGTTTATTT  | 0.92663958  | chrXII  | - | 660003  | 659986  | AGTATTCATGTTTACT   | 0.871065837 | 111 |
| 153 | chrXII  | - | 745115  | 745098  | TATCTTTATGTTTTGT   | 0.949064504 | chrXII  | + | 745006  | 745023  | TCGTTCAAACCTTTTGTC | 0.79040136  | 109 |
| 154 | chrXII  | - | 794207  | 794190  | AAAGTTTAAAGTTTAGTT | 0.935806549 | chrXII  | + | 794096  | 794113  | TTTGATCATAATTATTT  | 0.872143422 | 111 |
| 155 | chrXII  | - | 888740  | 888723  | GTTTTTATGTTTAGAT   | 0.952111375 | chrXII  | + | 888618  | 888635  | AATTTTTATAATTAATG  | 0.88656275  | 122 |
| 156 | chrXII  | + | 1007232 | 1007249 | ATGTTTCATATTTTTAT  | 0.888016553 | chrXII  | - | 1007338 | 1007321 | AAAATTTATAATTTAGT  | 0.886785202 | 106 |
| 157 | chrXII  | + | 1013789 | 1013806 | TTTTTTTATGTTTTCTC  | 0.951798435 | chrXII  | - | 1013882 | 1013865 | AAACAGTACGTTTTTTT  | 0.715569985 | 93  |
| 158 | chrXII  | - | 1024156 | 1024139 | CTTAATGATGTTTAGTT  | 0.887516109 | chrXII  | + | 1024017 | 1024034 | CTAGTTTTTAATTATAT  | 0.838833831 | 139 |
| 159 | chrXIII | + | 31766   | 31783   | GTAGTTTATTATTAGTT  | 0.89054401  | chrXIII | - | 31876   | 31859   | CATTAATAAATTATAT   | 0.824526619 | 110 |
| 160 | chrXIII | - | 94390   | 94373   | ATTAATTATATTAGAT   | 0.921181496 | chrXIII | + | 94266   | 94283   | ATGTTAAATATTTTATT  | 0.857637919 | 124 |
| 161 | chrXIII | + | 137321  | 137338  | AATATTATGTTTTGTT   | 0.980739388 | chrXIII | - | 137437  | 137420  | TTGTTATTTATTTTTGA  | 0.841585149 | 116 |
| 162 | chrXIII | - | 184017  | 184000  | GTTATATATGGTTAGTT  | 0.884678994 | chrXIII | + | 183864  | 183881  | ACATTAATAATTTTTGG  | 0.834854862 | 153 |
| 163 | chrXIII | + | 263126  | 263143  | ATTTTTTATATTTGTG   | 0.953471148 | chrXIII | - | 263313  | 263296  | TATGTATATTTTATCT   | 0.900878883 | 187 |
| 164 | chrXIII | + | 286846  | 286863  | ATTTTTCTTATTAGTT   | 0.921601724 | chrXIII | - | 286946  | 286929  | AGGATTTATGTTTTTTT  | 0.908582747 | 100 |
| 165 | chrXIII | + | 371020  | 371037  | AATTTTATTGTTTAGTT  | 0.937218464 | chrXIII | - | 371128  | 371111  | CACCTATATTTTTTTAT  | 0.851831461 | 108 |
| 166 | chrXIII | + | 468237  | 468254  | TTTTTTTATTTTTGTT   | 0.977274497 | chrXIII | - | 468357  | 468340  | ATCATTTTTAATTAGTA  | 0.851483278 | 120 |
| 167 | chrXIII | - | 535770  | 535753  | TTAATTTATATTAGTT   | 0.970090441 | chrXIII | + | 535662  | 535679  | AGTTGTTTTGTTTTTTT  | 0.82595884  | 108 |
| 168 | chrXIII | + | 611318  | 611335  | ATTGTTTATGTTTATGT  | 0.951906482 | chrXIII | - | 611459  | 611442  | ATTTGGCATCATTGTAT  | 0.685281331 | 141 |
| 169 | chrXIII | + | 634521  | 634538  | TATTTTACTATTTGTA   | 0.910848762 | chrXIII | - | 634639  | 634622  | CAATTTTATGGTCATTT  | 0.857274617 | 118 |
| 170 | chrXIII | + | 649362  | 649379  | TTATTTTCATATTTGTT  | 0.953558055 | chrXIII | - | 649549  | 649532  | CCTACTAACAAATTTCTC | 0.76251583  | 187 |
| 171 | chrXIII | - | 758417  | 758400  | AAATTTTATGTTTTTTT  | 0.965835588 | chrXIII | + | 758312  | 758329  | ACTTAGCGCGGTTTTTTT | 0.674331603 | 105 |
| 172 | chrXIII | + | 772677  | 772694  | TTTTTTTACTATTTACT  | 0.90600905  | chrXIII | - | 772820  | 772803  | AATTTATACAACATATAT | 0.778650456 | 143 |
| 173 | chrXIII | + | 805162  | 805179  | TATTTTTGATTTAGTC   | 0.881724676 | chrXIII | - | 805312  | 805295  | TTTTTTTACCTTTTTCC  | 0.903568549 | 150 |
| 174 | chrXIII | + | 815391  | 815408  | AAATCTATGTTTGTG    | 0.925335958 | chrXIII | - | 815493  | 815476  | ATTTTTTTTTTTTTGGA  | 0.903966564 | 102 |
| 175 | chrXIII | - | 897976  | 897959  | TTTTTTTATGTTGGTT   | 0.960544596 | chrXIII | + | 897881  | 897898  | TTATTTTATCATTTTCT  | 0.89758988  | 95  |
| 176 | chrXIV  | - | 28654   | 28637   | TTTTTTTATTTTAGTT   | 0.971445917 | chrXIV  | + | 28486   | 28503   | AAGTTAGATAATTAGCG  | 0.781498458 | 168 |
| 177 | chrXIV  | + | 61695   | 61712   | GTTTTTAAATGTTTGTA  | 0.934385921 | chrXIV  | - | 61857   | 61840   | TTTTTTTAAATTTTGCC  | 0.916575598 | 162 |
| 178 | chrXIV  | - | 89756   | 89739   | TATTTTAAAGTTTGTG   | 0.974909231 | chrXIV  | + | 89644   | 89661   | CTACTTATAGTTTTTCT  | 0.805190002 | 112 |
| 179 | chrXIV  | - | 169748  | 169731  | TAATTTAACGTTTGTG   | 0.953532134 | chrXIV  | + | 169589  | 169606  | TTTATATATATGTATGT  | 0.835743836 | 159 |
| 180 | chrXIV  | - | 196225  | 196208  | TTTTTTTAACTTTAGCC  | 0.904522219 | chrXIV  | + | 196096  | 196113  | TTCGTAATAAATTTTGC  | 0.820044435 | 129 |
| 181 | chrXIV  | - | 250464  | 250447  | AATTTTACGGTTTTTTT  | 0.918603933 | chrXIV  | + | 250330  | 250347  | GATAAACATATTCCTGT  | 0.787486687 | 134 |
| 182 | chrXIV  | - | 280066  | 280049  | ATTATTTATGTTTTTCT  | 0.94647878  | chrXIV  | + | 279948  | 279965  | ATAATAATTAATTAGTT  | 0.843720251 | 118 |
| 183 | chrXIV  | + | 322003  | 322020  | TTTGTTTACGTTTAGCC  | 0.937398674 | chrXIV  | - | 322198  | 322181  | GTTATAAATATTTATAA  | 0.847440569 | 195 |
| 184 | chrXIV  | - | 412441  | 412424  | TTTTTTTATATTTCTGC  | 0.869234054 | chrXIV  | + | 412299  | 412316  | CAACTTCTACATTACAT  | 0.72789922  | 142 |
| 185 | chrXIV  | - | 449536  | 449519  | CATATTTACATTTAGCC  | 0.905544669 | chrXIV  | + | 449372  | 449389  | TAAATCACTGTTATTT   | 0.822061337 | 164 |
| 186 | chrXIV  | + | 499040  | 499057  | TTTCTTTATGTTTAGCT  | 0.928956769 | chrXIV  | - | 499150  | 499133  | TATCTCTCTTTTTGTT   | 0.820455656 | 110 |
| 187 | chrXIV  | - | 546149  | 546132  | TATTTTACGTTTGGCC   | 0.956489817 | chrXIV  | + | 545981  | 545998  | AACATTAGTATTTAATT  | 0.792422254 | 168 |
| 188 | chrXIV  | - | 561330  | 561313  | TTTGTTTACATTTAGTT  | 0.930292374 | chrXIV  | + | 561216  | 561233  | TTGATTTACATTTCAAC  | 0.797477323 | 114 |
| 189 | chrXIV  | + | 609536  | 609553  | TTTTTTTATGTTTATTT  | 0.986916959 | chrXIV  | - | 609674  | 609657  | TATTTATGCTTTTACTT  | 0.819944062 | 138 |
| 190 | chrXIV  | - | 635833  | 635816  | TTTTTTTAAATTTAGTT  | 0.954915715 | chrXIV  | + | 635716  | 635733  | TGTTTTTTTTTTTTGCA  | 0.87217818  | 117 |
| 191 | chrXIV  | - | 691680  | 691663  | GTAATTAACATTTGTGTT | 0.910156612 | chrXIV  | + | 691559  | 691576  | GATATTTCCCTTTTGGGA | 0.801789741 | 121 |
| 192 | chrXV   | + | 35714   | 35731   | TATATTTATATTTAGAG  | 0.929297843 | chrXV   | - | 35855   | 35838   | CATATTTATGTTTCATT  | 0.847487414 | 141 |
| 193 | chrXV   | + | 72688   | 72705   | TTTTTTTACTTTTAGTT  | 0.962701666 | chrXV   | - | 72794   | 72777   | TTTTATCACGTTTAGCA  | 0.883721557 | 106 |
| 194 | chrXV   | - | 85366   | 85349   | TATACCTATATTTATGT  | 0.817468435 | chrXV   | + | 85268   | 85285   | GCTTTTAAATTTTATTT  | 0.887881307 | 98  |
| 195 | chrXV   | + | 113895  | 113912  | ATTGTTTATATTTTGT   | 0.943227229 | chrXV   | - | 114058  | 114041  | TAATATCATGTTTATA   | 0.868893438 | 163 |
| 196 | chrXV   | + | 167003  | 167020  | TTTATTTATGTTTTCGT  | 0.95396729  | chrXV   | - | 167143  | 167126  | TTTAAAACCTGTTTACGT | 0.78001402  | 140 |
| 197 | chrXV   | - | 277732  | 277715  | GTTGTTTATCTTTTGT   | 0.926499065 | chrXV   | + | 277562  | 277579  | TTATAAAAAATTTATTT  | 0.859561998 | 170 |

|     |        |   |         |         |                    |             |        |   |         |         |                   |             |     |
|-----|--------|---|---------|---------|--------------------|-------------|--------|---|---------|---------|-------------------|-------------|-----|
| 198 | chrXV  | - | 337483  | 337466  | TCTTTTACCTTTTGTC   | 0.904262836 | chrXV  | + | 337385  | 337402  | TATTTTAGTATTATTT  | 0.870845988 | 98  |
| 199 | chrXV  | + | 436790  | 436807  | TATATTTATTTTATTC   | 0.935122318 | chrXV  | - | 436888  | 436871  | TTCTTTTTTCATTTATT | 0.832867098 | 98  |
| 200 | chrXV  | - | 490060  | 490043  | GTTGTTTTCTTTTCTT   | 0.860946443 | chrXV  | + | 489890  | 489907  | TAAGTTTATATTTTGGT | 0.951016266 | 170 |
| 201 | chrXV  | - | 566597  | 566580  | AAATTTTACCTTTTGAT  | 0.915947006 | chrXV  | + | 566499  | 566516  | AATATTTAATATCTCTT | 0.824916747 | 98  |
| 202 | chrXV  | + | 656701  | 656718  | CTATTTAATGATTAGTA  | 0.901351813 | chrXV  | - | 656901  | 656884  | GTTGATTTCTTTTCTT  | 0.817366446 | 200 |
| 203 | chrXV  | + | 729795  | 729812  | TATTTTATATTTTGGC   | 0.964523057 | chrXV  | - | 729894  | 729877  | TTCTTTCATTTTGTAC  | 0.823636542 | 99  |
| 204 | chrXV  | + | 766689  | 766706  | GTATTTTACGTTTTTTC  | 0.912718329 | chrXV  | - | 766791  | 766774  | TATTTTAAATTTCTGTA | 0.860782306 | 102 |
| 205 | chrXV  | + | 783386  | 783403  | TATTTTAACTTTTGGT   | 0.942451749 | chrXV  | - | 783582  | 783565  | TCTTTTATCTCTTCAA  | 0.777182413 | 196 |
| 206 | chrXV  | - | 874370  | 874353  | CATTTTAAATTTTGTTA  | 0.881539907 | chrXV  | + | 874192  | 874209  | AAGTTTCCGTTTAGCA  | 0.807156571 | 178 |
| 207 | chrXV  | + | 908307  | 908324  | CTAAACTTTGTTTATGT  | 0.815272772 | chrXV  | - | 908439  | 908422  | GGTTTTTTTTTTAAGT  | 0.8448056   | 132 |
| 208 | chrXV  | + | 981507  | 981524  | TTTTTTTATTTATATT   | 0.874148828 | chrXV  | - | 981603  | 981586  | TTTTTTCATGATTTTGT | 0.924378634 | 96  |
| 209 | chrXV  | + | 1053687 | 1053704 | TAAATTAATTGTTTTGTT | 0.896133812 | chrXV  | - | 1053797 | 1053780 | CGATTAATGTTTTTAT  | 0.856030986 | 110 |
| 210 | chrXVI | - | 43150   | 43133   | TTTGTTTATATTTTGA   | 0.929263085 | chrXVI | + | 42958   | 42975   | TTCTTTTACCTTTAATA | 0.863567037 | 192 |
| 211 | chrXVI | + | 73104   | 73121   | GTTTTTTTTGTTTTTTC  | 0.902693595 | chrXVI | - | 73301   | 73284   | TATATTTATAATTATAA | 0.896514883 | 197 |
| 212 | chrXVI | + | 116593  | 116610  | TATTTTATGTTTTGTT   | 0.998337845 | chrXVI | - | 116770  | 116753  | TAAAATTAAGTTTTGCG | 0.868507637 | 177 |
| 213 | chrXVI | + | 289531  | 289548  | ATAATTAATGTTTACTT  | 0.925413716 | chrXVI | - | 289675  | 289658  | AAAGTTAATTTTTATAT | 0.885623957 | 144 |
| 214 | chrXVI | + | 384591  | 384608  | TATTCTAAAATTTATGT  | 0.840759582 | chrXVI | - | 384718  | 384701  | TTTAAATATATTTAAGT | 0.869580534 | 127 |
| 215 | chrXVI | + | 418177  | 418194  | TTCTTTCTATTACAA    | 0.82265266  | chrXVI | - | 418289  | 418272  | TATTATTTGTTTTCTT  | 0.900944489 | 112 |
| 216 | chrXVI | - | 456763  | 456746  | TTTTTATTTTTTTGTT   | 0.945433762 | chrXVI | + | 456626  | 456643  | CTTATTCACAATTTCAA | 0.820656345 | 137 |
| 217 | chrXVI | + | 511708  | 511725  | TATTTTATGTTTTTTG   | 0.954763972 | chrXVI | - | 511820  | 511803  | GTGGTTATCATTTATTT | 0.826572147 | 112 |
| 218 | chrXVI | + | 563881  | 563898  | AGTCTTTTATATTTAGT  | 0.760925944 | chrXVI | - | 563991  | 563974  | TCTAAATATATTCATCT | 0.791939697 | 110 |
| 219 | chrXVI | + | 565119  | 565136  | TGTTTTTAATTTTATGT  | 0.884153732 | chrXVI | - | 565272  | 565255  | TTTTTGGTTCTTTTGTT | 0.822137769 | 153 |
| 220 | chrXVI | + | 633925  | 633942  | CGTTTTTATAGTTTAGT  | 0.858684766 | chrXVI | - | 634064  | 634047  | TTGTTTTATATTTAACA | 0.875389458 | 139 |
| 221 | chrXVI | + | 684409  | 684426  | TTTTTTTTACTTTTTGT  | 0.892233188 | chrXVI | - | 684534  | 684517  | CATATGTTTGTTAGCT  | 0.847979457 | 125 |
| 222 | chrXVI | - | 695624  | 695607  | TTTTTTTTAATTTTCT   | 0.889872135 | chrXVI | + | 695470  | 695487  | AATTTTATATTTGGTT  | 0.944984083 | 154 |
| 223 | chrXVI | + | 749121  | 749138  | AATTTTTAAGTTTAGTA  | 0.947297384 | chrXVI | - | 749222  | 749205  | ATAATTTACATTTTATT | 0.907501113 | 101 |
| 224 | chrXVI | - | 777098  | 777081  | TTTATTTATATTTGGC   | 0.954875691 | chrXVI | + | 776923  | 776940  | AATGTGTTAGTTTTTCT | 0.811819984 | 175 |
| 225 | chrXVI | - | 819345  | 819328  | AATTTTATATTTATTC   | 0.952049491 | chrXVI | + | 819204  | 819221  | TATATTATCATATAGTT | 0.819972999 | 141 |
| 226 | chrXVI | - | 842856  | 842839  | TTTATTAGATTTAGTT   | 0.894404608 | chrXVI | + | 842714  | 842731  | AATTTTAACTTTTAGTA | 0.928064324 | 142 |
| 227 | chrXVI | + | 880904  | 880921  | CTCATATATATTTATG   | 0.822074378 | chrXVI | - | 881035  | 881018  | TAACCTAACTTTTTTA  | 0.800027746 | 131 |
| 228 | chrXVI | - | 933170  | 933153  | CTTATTACGTTTAGCT   | 0.93305337  | chrXVI | + | 933047  | 933064  | ATTCAAAAATATTTTGA | 0.822210839 | 123 |

## SUPPLEMENTARY FIGURE LEGENDS

### **Supplementary Figure 1, related to Figure 1: Measures on mapped secondary ACSs.**

(A). Average distribution of the distances between the main and the putative secondary ACS defined based on conformity to the consensus sequence defined in Coster et al. (Coster and Diffley, 2017) for every ARS. (B). Distribution of the average scores of main (blue) and putative secondary ACSs (red).

### **Supplementary Figure 2, related to Figure 2: ARS305 sequence confers mitotic maintenance to a centromeric plasmid when transcription is shut down.**

To assess the functionality of ARS305 in the reporter construct used for detecting transcription termination, we deleted the  $2\mu$  origin of the plasmid and transformed yeast in the presence or absence of doxycycline to control expression of the *TET* promoter. Transformants were only recovered in the absence of transcription, indicating that ARS305 is active but inactivated, as expected, when strong transcription is run through it.

# Candelli *et al.*, Supplementary Figure 1

## A

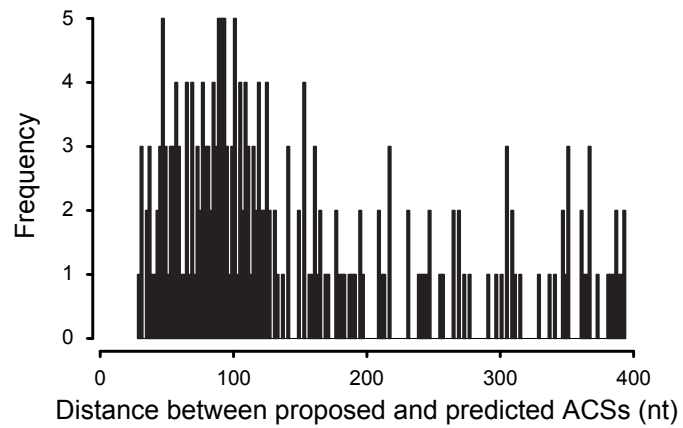

## B

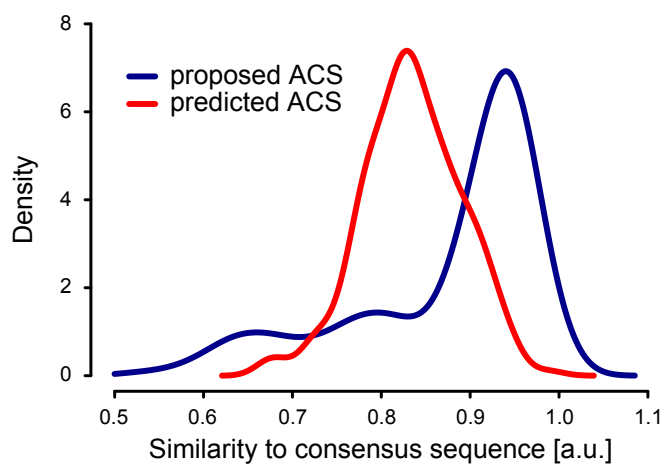

# Candelli *et al.*, Supplementary Figure 2

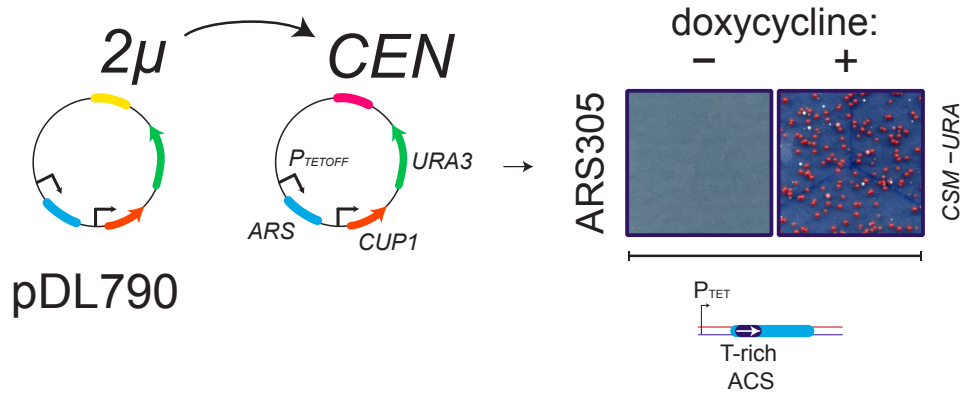

Candelli *et al.*, Supplementary Table 1

| Chromosome | Strand | Coordinate (5' end of T-rich ACS) | Total transcription over a 100nt window starting at coordinate |
|------------|--------|-----------------------------------|----------------------------------------------------------------|
| chrXIII    | +      | 634522                            | 180.7264823                                                    |
| chrXI      | -      | 55865                             | 103.3148095                                                    |
| chrXV      | -      | 85365                             | 94.97816782                                                    |
| chrIX      | +      | 214732                            | 91.40532139                                                    |
| chrXV      | +      | 729795                            | 84.25962851                                                    |
| chrXVI     | +      | 749117                            | 78.90035885                                                    |
| chrIV      | +      | 253840                            | 76.22072402                                                    |
| chrX       | +      | 99505                             | 64.31123589                                                    |
| chrXII     | -      | 794207                            | 62.82254988                                                    |
| chrXIV     | +      | 61694                             | 59.54744064                                                    |
| chrXIII    | +      | 805162                            | 58.05875463                                                    |
| chrIV      | -      | 86124                             | 56.27233141                                                    |
| chrXVI     | -      | 43150                             | 54.78364539                                                    |
| chrXII     | +      | 156700                            | 46.4470037                                                     |
| chrVII     | -      | 977906                            | 46.4470037                                                     |
| chrIV      | -      | 329741                            | 45.25605489                                                    |
| chrIV      | +      | 921736                            | 44.66058048                                                    |
| chrIV      | -      | 484034                            | 44.36284328                                                    |
| chrX       | -      | 654244                            | 40.78999684                                                    |
| chrIV      | -      | 640062                            | 40.78999684                                                    |
| chrV       | +      | 212455                            | 40.78999684                                                    |
| chrX       | +      | 337048                            | 39.89678523                                                    |
| chrIX      | +      | 357222                            | 37.81262481                                                    |
| chrXVI     | +      | 289531                            | 36.32393879                                                    |
| chrX       | -      | 67713                             | 35.43072718                                                    |
| chrXII     | -      | 888741                            | 35.43072718                                                    |
| chrXII     | +      | 1007235                           | 35.13298998                                                    |
| chrX       | +      | 298616                            | 34.23977837                                                    |
| chrXVI     | +      | 384592                            | 34.23977837                                                    |
| chrVIII    | +      | 168596                            | 33.34656676                                                    |
| chrXIII    | -      | 94390                             | 33.04882956                                                    |
| chrXIV     | -      | 449533                            | 32.15561795                                                    |
| chrII      | -      | 408003                            | 32.15561795                                                    |
| chrXII     | +      | 1013785                           | 29.17824591                                                    |
| chrXI      | +      | 98386                             | 28.88050871                                                    |

|         |   |         |             |
|---------|---|---------|-------------|
| chrVII  | - | 388847  | 28.88050871 |
| chrXII  | - | 459091  | 28.58277151 |
| chrXV   | + | 113894  | 27.9872971  |
| chrIV   | + | 123676  | 27.9872971  |
| chrIV   | + | 1404322 | 27.6895599  |
| chrV    | - | 145713  | 27.09408549 |
| chrII   | + | 622713  | 26.79634829 |
| chrIV   | - | 1166170 | 26.79634829 |
| chrXV   | + | 766690  | 25.90313668 |
| chrXIV  | - | 196224  | 25.30766227 |
| chrXVI  | - | 695618  | 23.81897626 |
| chrIV   | - | 567676  | 23.81897626 |
| chrXV   | + | 35713   | 23.52123905 |
| chrXI   | + | 388662  | 23.22350185 |
| chrXIII | + | 611318  | 23.22350185 |
| chrVII  | - | 508909  | 22.92576465 |
| chrXIV  | - | 89754   | 22.92576465 |
| chrXVI  | + | 684405  | 22.62802744 |
| chrXIII | + | 468236  | 22.03255304 |
| chrII   | + | 757442  | 22.03255304 |
| chrIII  | - | 108968  | 21.73481583 |
| chrIX   | - | 136287  | 21.43707863 |
| chrIV   | + | 1057887 | 21.43707863 |
| chrIII  | + | 224854  | 20.54386702 |
| chrXII  | - | 450660  | 20.24612982 |
| chrVII  | - | 834667  | 20.24612982 |
| chrVI   | + | 216469  | 19.94839262 |
| chrII   | - | 741741  | 19.65065541 |
| chrIV   | + | 1276267 | 18.7574438  |
| chrVIII | - | 501945  | 18.4597066  |
| chrXVI  | - | 842851  | 18.4597066  |
| chrXIV  | - | 280062  | 18.1619694  |
| chrXIII | - | 758417  | 18.1619694  |
| chrIX   | - | 105966  | 17.56649499 |
| chrXIV  | - | 635830  | 16.67328338 |
| chrVII  | + | 163240  | 16.67328338 |
| chrIV   | + | 1240919 | 16.07780897 |
| chrIX   | + | 175170  | 15.78007177 |
| chrXII  | + | 659892  | 15.78007177 |
| chrIII  | + | 132037  | 15.78007177 |



|         |   |         |             |
|---------|---|---------|-------------|
| chrXIV  | - | 169747  | 15.48233457 |
| chrVIII | - | 447792  | 14.88686016 |
| chrI    | - | 124522  | 14.58912296 |
| chrXII  | - | 1024151 | 14.29138575 |
| chrXIV  | + | 609532  | 14.29138575 |
| chrXIII | + | 649361  | 13.99364855 |
| chrXIII | + | 31767   | 13.99364855 |
| chrXIV  | - | 412438  | 13.99364855 |
| chrXV   | + | 656702  | 13.69591135 |
| chrXVI  | - | 933164  | 13.10043694 |
| chrI    | - | 70433   | 13.10043694 |
| chrXIV  | - | 546145  | 13.10043694 |
| chrIV   | - | 555396  | 13.10043694 |
| chrV    | - | 406902  | 13.10043694 |
| chrVII  | + | 715315  | 13.10043694 |
| chrXVI  | + | 116593  | 13.10043694 |
| chrX    | - | 736905  | 12.80269974 |
| chrII   | - | 237834  | 12.80269974 |
| chrXIV  | - | 28653   | 12.20722533 |
| chrV    | - | 59469   | 11.90948813 |
| chrV    | + | 549585  | 11.90948813 |
| chrX    | + | 540302  | 11.90948813 |
| chrXI   | - | 612045  | 11.90948813 |
| chrXII  | + | 231250  | 11.90948813 |
| chrVII  | - | 421284  | 11.61175093 |
| chrIX   | - | 412000  | 11.61175093 |
| chrVIII | + | 245789  | 11.61175093 |
| chrXV   | - | 874367  | 11.61175093 |
| chrII   | - | 170222  | 10.71853932 |
| chrVIII | + | 64300   | 10.71853932 |
| chrX    | + | 711661  | 10.71853932 |
| chrXIV  | + | 322000  | 10.71853932 |
| chrII   | - | 255040  | 10.12306491 |
| chrV    | + | 94056   | 10.12306491 |
| chrXII  | - | 513085  | 10.12306491 |
| chrXII  | + | 91466   | 10.12306491 |
| chrXV   | + | 167002  | 10.12306491 |
| chrXI   | + | 416878  | 9.825327706 |
| chrXIII | + | 371020  | 9.825327706 |
| chrIV   | - | 212593  | 9.527590503 |

|         |   |         |             |
|---------|---|---------|-------------|
| chrV    | - | 173807  | 9.527590503 |
| chrXV   | + | 908307  | 9.527590503 |
| chrXIII | + | 772677  | 9.2298533   |
| chrI    | + | 176232  | 8.932116096 |
| chrIV   | - | 1110132 | 8.932116096 |
| chrVII  | - | 485113  | 8.932116096 |
| chrXIV  | - | 250464  | 8.634378893 |
| chrI    | + | 159951  | 8.33664169  |
| chrII   | + | 28985   | 8.33664169  |
| chrVII  | - | 660002  | 8.33664169  |
| chrIII  | + | 74522   | 8.038904487 |
| chrXV   | + | 783387  | 8.038904487 |
| chrXI   | + | 642412  | 7.741167283 |
| chrIV   | + | 408131  | 7.741167283 |
| chrVII  | + | 203975  | 7.741167283 |
| chrII   | + | 326153  | 7.741167283 |
| chrXV   | + | 436792  | 7.44343008  |
| chrXVI  | + | 73105   | 7.44343008  |
| chrVII  | - | 64457   | 7.44343008  |
| chrXIV  | - | 691677  | 7.44343008  |
| chrXV   | - | 337483  | 7.44343008  |
| chrXII  | - | 412854  | 6.847955674 |
| chrIV   | - | 1302755 | 6.847955674 |
| chrXIII | + | 815391  | 6.847955674 |
| chrX    | + | 729813  | 6.550218471 |
| chrXIII | - | 184017  | 6.401349869 |
| chrII   | - | 198385  | 6.252481267 |
| chrXII  | - | 373328  | 5.954744064 |
| chrXIV  | + | 499038  | 5.954744064 |
| chrVIII | - | 133530  | 5.954744064 |
| chrIV   | + | 913856  | 5.657006861 |
| chrXIV  | - | 561326  | 5.657006861 |
| chrXIII | - | 535769  | 5.359269658 |
| chrIX   | - | 342028  | 5.061532455 |
| chrXV   | + | 72688   | 5.061532455 |
| chrXIII | + | 263126  | 4.763795251 |
| chrIV   | + | 1461899 | 4.466058048 |
| chrXII  | - | 289421  | 4.466058048 |
| chrIII  | - | 39591   | 4.466058048 |
| chrVII  | - | 352864  | 4.466058048 |

|         |   |         |             |
|---------|---|---------|-------------|
| chrV    | + | 353582  | 4.168320845 |
| chrVIII | + | 556137  | 4.168320845 |
| chrIV   | + | 806100  | 4.168320845 |
| chrIV   | + | 702924  | 4.168320845 |
| chrIV   | - | 505517  | 4.168320845 |
| chrIV   | - | 1159450 | 4.168320845 |
| chrVII  | + | 888415  | 4.168320845 |
| chrXVI  | - | 777094  | 4.168320845 |
| chrIV   | - | 15681   | 3.870583642 |
| chrXVI  | + | 633921  | 3.870583642 |
| chrVII  | - | 568661  | 3.870583642 |
| chrVIII | - | 392253  | 3.870583642 |
| chrII   | - | 417972  | 3.870583642 |
| chrX    | - | 417089  | 3.870583642 |
| chrI    | + | 31002   | 3.572846439 |
| chrVI   | - | 167731  | 3.572846439 |
| chrVII  | + | 778015  | 3.572846439 |
| chrXV   | - | 566597  | 3.572846439 |
| chrXVI  | + | 511704  | 3.572846439 |
| chrXI   | - | 153121  | 3.275109235 |
| chrII   | - | 486858  | 3.275109235 |
| chrIV   | - | 1487091 | 2.977372032 |
| chrXIII | + | 137321  | 2.977372032 |
| chrV    | + | 287565  | 2.977372032 |
| chrVI   | + | 199401  | 2.977372032 |
| chrXIII | - | 897977  | 2.977372032 |
| chrXVI  | + | 880906  | 2.977372032 |
| chrXI   | - | 213308  | 2.828503431 |
| chrIII  | - | 273023  | 2.679634829 |
| chrX    | + | 683706  | 2.679634829 |
| chrXV   | + | 981505  | 2.679634829 |
| chrII   | - | 63370   | 2.381897626 |
| chrXV   | - | 277732  | 2.381897626 |
| chrIII  | + | 315873  | 1.488686016 |
| chrX    | - | 7731    | 1.488686016 |

Candelli *et al.*, Supplementary Table 2

| Chromosome | Strand | Coordinate (5' end of T-rich ACS) | Total transcription over a 200nt window starting at coordinate |
|------------|--------|-----------------------------------|----------------------------------------------------------------|
| chrXIV     | +      | 61694                             | 130.7066322                                                    |
| chrXII     | -      | 794207                            | 74.73203801                                                    |
| chrXIII    | +      | 634522                            | 71.45692877                                                    |
| chrVIII    | +      | 168596                            | 71.15919157                                                    |
| chrXV      | -      | 85365                             | 69.67050555                                                    |
| chrX       | +      | 99505                             | 69.37276835                                                    |
| chrIV      | +      | 253840                            | 64.01349869                                                    |
| chrXI      | -      | 55865                             | 63.71576149                                                    |
| chrIV      | -      | 86124                             | 61.92933827                                                    |
| chrXIV     | -      | 89754                             | 59.24970344                                                    |
| chrXVI     | -      | 43150                             | 57.76101742                                                    |
| chrVII     | -      | 977906                            | 55.9745942                                                     |
| chrIX      | +      | 214732                            | 52.10401056                                                    |
| chrXVI     | +      | 749117                            | 51.80627336                                                    |
| chrXV      | +      | 729795                            | 51.50853616                                                    |
| chrIV      | +      | 1240919                           | 48.53116412                                                    |
| chrXIV     | -      | 546145                            | 46.4470037                                                     |
| chrXII     | +      | 156700                            | 45.25605489                                                    |
| chrV       | -      | 145713                            | 42.87415726                                                    |
| chrII      | -      | 408003                            | 41.68320845                                                    |
| chrX       | +      | 337048                            | 37.81262481                                                    |
| chrIV      | +      | 1057887                           | 36.32393879                                                    |
| chrXII     | +      | 1007235                           | 35.43072718                                                    |
| chrIX      | +      | 357222                            | 35.13298998                                                    |
| chrIV      | -      | 640062                            | 33.34656676                                                    |
| chrIV      | +      | 921736                            | 33.04882956                                                    |
| chrXII     | +      | 1013785                           | 33.04882956                                                    |
| chrVII     | -      | 388847                            | 32.75109235                                                    |
| chrV       | +      | 212455                            | 31.85788074                                                    |
| chrIV      | -      | 329741                            | 31.26240634                                                    |
| chrXVI     | +      | 384592                            | 30.96466913                                                    |
| chrX       | -      | 654244                            | 30.96466913                                                    |
| chrXII     | -      | 888741                            | 30.36919473                                                    |
| chrIV      | -      | 1166170                           | 30.07145752                                                    |
| chrXVI     | +      | 289531                            | 30.07145752                                                    |

|         |   |         |             |
|---------|---|---------|-------------|
| chrX    | + | 298616  | 29.77372032 |
| chrXIII | + | 805162  | 29.47598312 |
| chrXIV  | - | 280062  | 27.9872971  |
| chrIX   | - | 136287  | 27.9872971  |
| chrXV   | + | 113894  | 27.9872971  |
| chrIV   | - | 484034  | 27.6895599  |
| chrVII  | - | 660002  | 27.3918227  |
| chrIV   | - | 567676  | 27.09408549 |
| chrIII  | - | 108968  | 27.09408549 |
| chrXI   | + | 98386   | 27.09408549 |
| chrXIV  | - | 250464  | 26.79634829 |
| chrX    | - | 67713   | 26.49861109 |
| chrXIII | + | 468236  | 26.20087388 |
| chrII   | + | 757442  | 25.90313668 |
| chrXIII | - | 94390   | 25.30766227 |
| chrVII  | - | 834667  | 25.00992507 |
| chrXIV  | - | 449533  | 24.71218787 |
| chrXV   | + | 766690  | 24.41445066 |
| chrXVI  | + | 684405  | 24.11671346 |
| chrXII  | + | 231250  | 23.81897626 |
| chrXIV  | - | 169747  | 23.81897626 |
| chrIV   | + | 1404322 | 23.52123905 |
| chrXII  | - | 459091  | 22.33029024 |
| chrIV   | + | 123676  | 21.73481583 |
| chrIX   | - | 412000  | 21.43707863 |
| chrXI   | + | 388662  | 21.13934143 |
| chrXIV  | - | 635830  | 21.13934143 |
| chrXVI  | - | 842851  | 20.84160422 |
| chrXIII | - | 758417  | 20.54386702 |
| chrIV   | - | 555396  | 20.54386702 |
| chrVI   | + | 216469  | 20.54386702 |
| chrXIV  | - | 412438  | 20.54386702 |
| chrII   | - | 741741  | 20.54386702 |
| chrV    | - | 406902  | 19.05518101 |
| chrIX   | - | 105966  | 19.05518101 |
| chrIII  | + | 224854  | 19.05518101 |
| chrVIII | - | 501945  | 18.7574438  |
| chrI    | - | 124522  | 18.7574438  |
| chrXIV  | + | 322000  | 18.4597066  |
| chrV    | + | 549585  | 18.1619694  |

|         |   |         |             |
|---------|---|---------|-------------|
| chrIV   | + | 1276267 | 17.56649499 |
| chrXIII | + | 31767   | 17.56649499 |
| chrXV   | + | 35713   | 17.26875779 |
| chrVII  | - | 421284  | 17.26875779 |
| chrXVI  | - | 695618  | 17.26875779 |
| chrXIV  | - | 691677  | 17.26875779 |
| chrIV   | - | 1110132 | 17.26875779 |
| chrXIII | + | 611318  | 16.97102058 |
| chrXII  | - | 450660  | 16.97102058 |
| chrXII  | - | 1024151 | 16.07780897 |
| chrX    | + | 540302  | 15.78007177 |
| chrII   | - | 255040  | 15.78007177 |
| chrXIII | + | 815391  | 15.48233457 |
| chrXIII | + | 649361  | 15.48233457 |
| chrI    | - | 70433   | 15.48233457 |
| chrVII  | + | 715315  | 15.18459736 |
| chrIX   | + | 175170  | 14.88686016 |
| chrIV   | + | 408131  | 14.58912296 |
| chrV    | - | 59469   | 14.58912296 |
| chrXVI  | + | 73105   | 14.14251715 |
| chrXV   | + | 436792  | 13.69591135 |
| chrIV   | - | 1302755 | 13.69591135 |
| chrXV   | - | 874367  | 13.69591135 |
| chrII   | + | 622713  | 13.39817414 |
| chrIV   | + | 913856  | 12.80269974 |
| chrXIV  | - | 196224  | 12.80269974 |
| chrXII  | + | 659892  | 12.80269974 |
| chrXVI  | - | 933164  | 12.50496253 |
| chrVIII | + | 64300   | 12.50496253 |
| chrV    | - | 173807  | 11.90948813 |
| chrXV   | + | 656702  | 11.90948813 |
| chrIII  | + | 132037  | 11.90948813 |
| chrVII  | + | 163240  | 11.90948813 |
| chrII   | - | 170222  | 11.61175093 |
| chrXI   | - | 612045  | 11.61175093 |
| chrIV   | - | 212593  | 11.31401372 |
| chrII   | + | 28985   | 11.01627652 |
| chrVIII | - | 447792  | 11.01627652 |
| chrX    | + | 711661  | 10.71853932 |
| chrXII  | - | 373328  | 10.71853932 |

|         |   |         |             |
|---------|---|---------|-------------|
| chrVII  | - | 352864  | 10.42080211 |
| chrX    | - | 736905  | 10.42080211 |
| chrXVI  | + | 116593  | 10.42080211 |
| chrXIII | + | 371020  | 10.42080211 |
| chrVII  | - | 64457   | 10.12306491 |
| chrXIV  | - | 28653   | 9.825327706 |
| chrXV   | - | 337483  | 9.527590503 |
| chrII   | - | 237834  | 9.527590503 |
| chrVII  | - | 485113  | 9.527590503 |
| chrXII  | - | 513085  | 9.527590503 |
| chrXIV  | + | 609532  | 9.527590503 |
| chrVIII | + | 245789  | 9.2298533   |
| chrI    | + | 159951  | 8.932116096 |
| chrII   | - | 198385  | 8.932116096 |
| chrIII  | - | 39591   | 8.634378893 |
| chrII   | + | 326153  | 8.634378893 |
| chrV    | + | 94056   | 8.634378893 |
| chrXIII | - | 535769  | 8.634378893 |
| chrVII  | - | 508909  | 8.33664169  |
| chrI    | + | 31002   | 8.33664169  |
| chrVII  | + | 203975  | 8.038904487 |
| chrI    | + | 176232  | 8.038904487 |
| chrIII  | + | 74522   | 8.038904487 |
| chrXIII | + | 772677  | 7.890035885 |
| chrXIV  | - | 561326  | 7.890035885 |
| chrXI   | + | 642412  | 7.741167283 |
| chrXV   | + | 783387  | 7.741167283 |
| chrVIII | - | 133530  | 7.44343008  |
| chrXV   | + | 908307  | 7.145692877 |
| chrIV   | + | 1461899 | 7.145692877 |
| chrIV   | + | 702924  | 6.996824275 |
| chrV    | + | 353582  | 6.847955674 |
| chrXIV  | + | 499038  | 6.847955674 |
| chrXII  | + | 91466   | 6.550218471 |
| chrXIII | + | 263126  | 6.252481267 |
| chrXII  | - | 412854  | 5.954744064 |
| chrXI   | - | 153121  | 5.954744064 |
| chrVII  | - | 568661  | 5.657006861 |
| chrXII  | - | 289421  | 5.359269658 |
| chrVIII | - | 392253  | 5.359269658 |



|         |   |         |             |
|---------|---|---------|-------------|
| chrII   | - | 486858  | 5.061532455 |
| chrXV   | + | 72688   | 5.061532455 |
| chrIX   | - | 342028  | 4.763795251 |
| chrXIII | - | 184017  | 4.763795251 |
| chrIV   | - | 505517  | 4.763795251 |
| chrX    | - | 417089  | 4.763795251 |
| chrXVI  | - | 777094  | 4.763795251 |
| chrXIII | + | 137321  | 4.466058048 |
| chrII   | - | 417972  | 4.466058048 |
| chrIII  | - | 273023  | 4.466058048 |
| chrXV   | + | 167002  | 4.466058048 |
| chrXVI  | + | 633921  | 4.168320845 |
| chrVII  | + | 888415  | 4.168320845 |
| chrXV   | + | 981505  | 4.168320845 |
| chrVII  | + | 778015  | 3.870583642 |
| chrXI   | + | 416878  | 3.870583642 |
| chrIV   | + | 806100  | 3.870583642 |
| chrIV   | - | 1159450 | 3.870583642 |
| chrV    | + | 287565  | 3.870583642 |
| chrIV   | - | 15681   | 3.870583642 |
| chrXVI  | + | 511704  | 3.870583642 |
| chrIV   | - | 1487091 | 3.572846439 |
| chrXV   | - | 566597  | 3.275109235 |
| chrVI   | - | 167731  | 3.275109235 |
| chrXVI  | + | 880906  | 3.275109235 |
| chrII   | - | 63370   | 2.977372032 |
| chrX    | + | 729813  | 2.977372032 |
| chrXI   | - | 213308  | 2.679634829 |
| chrXIII | - | 897977  | 2.679634829 |
| chrVI   | + | 199401  | 2.679634829 |
| chrX    | + | 683706  | 2.084160422 |
| chrXV   | - | 277732  | 2.084160422 |
| chrVIII | + | 556137  | 1.786423219 |
| chrIII  | + | 315873  | 1.190948813 |
| chrX    | - | 7731    | 1.190948813 |

Candelli *et al.*, Supplementary Table 3

| Chromosome | Strand | Coordinate (5' end of T-rich ACS) | Total transcription over a 200nt window starting at coordinate |
|------------|--------|-----------------------------------|----------------------------------------------------------------|
| chrXV      | -      | 85365                             | 69.67050555                                                    |
| chrX       | +      | 99505                             | 69.37276835                                                    |
| chrIV      | +      | 253840                            | 64.01349869                                                    |
| chrXIV     | -      | 89754                             | 59.24970344                                                    |
| chrXVI     | -      | 43150                             | 57.76101742                                                    |
| chrVII     | -      | 977906                            | 55.9745942                                                     |
| chrIX      | +      | 214732                            | 52.10401056                                                    |
| chrXVI     | +      | 749117                            | 51.80627336                                                    |
| chrXV      | +      | 729795                            | 51.50853616                                                    |
| chrXII     | +      | 156700                            | 45.25605489                                                    |
| chrV       | -      | 145713                            | 42.87415726                                                    |
| chrII      | -      | 408003                            | 41.68320845                                                    |
| chrIV      | +      | 1057887                           | 36.32393879                                                    |
| chrXII     | +      | 1007235                           | 35.43072718                                                    |
| chrIV      | +      | 921736                            | 33.04882956                                                    |
| chrVII     | -      | 388847                            | 32.75109235                                                    |
| chrXVI     | +      | 384592                            | 30.96466913                                                    |
| chrXII     | -      | 888741                            | 30.36919473                                                    |
| chrIV      | -      | 1166170                           | 30.07145752                                                    |
| chrXIII    | +      | 805162                            | 29.47598312                                                    |
| chrIX      | -      | 136287                            | 27.9872971                                                     |
| chrX       | -      | 67713                             | 26.49861109                                                    |
| chrXII     | +      | 231250                            | 23.81897626                                                    |
| chrIV      | +      | 1404322                           | 23.52123905                                                    |
| chrXIV     | -      | 635830                            | 21.13934143                                                    |
| chrV       | -      | 406902                            | 19.05518101                                                    |
| chrIII     | +      | 224854                            | 19.05518101                                                    |
| chrII      | -      | 255040                            | 15.78007177                                                    |
| chrXIII    | +      | 649361                            | 15.48233457                                                    |
| chrV       | -      | 59469                             | 14.58912296                                                    |
| chrIX      | -      | 342028                            | 4.763795251                                                    |
